# Supplementary material for: THZ531 Induces a State of BRCAness in Multiple Myeloma Cells: Synthetic Lethality with Combination Treatment of THZ 531 with DNA Repair Inhibitors
Source: Int J Mol Sci. 2022 Jan 21;23(3):1207. doi: 10.3390/ijms23031207 (PMC8835885; doi:10.3390/ijms23031207)
Supplement: Supplementary file 1 [file ijms-23-01207-s001.zip]

Archive with 4 entries (4 files):
- Supplementary data/Supplementary Figures.pdf
- Supplementary data/Supplementary Table 1.xlsx
- Supplementary data/Supplementary Table 2.xlsx
- Supplementary data/Supplementary Table 3.pdf
