# Supplementary material for: THZ531 Induces a State of BRCAness in Multiple Myeloma Cells: Synthetic Lethality with Combination Treatment of THZ 531 with DNA Repair Inhibitors
Source: Int J Mol Sci. 2022 Jan 21;23(3):1207. doi: 10.3390/ijms23031207 (PMC8835885; doi:10.3390/ijms23031207)
Supplement: Supplementary file 1 [file ijms-23-01207-s001.zip › Supplementary data/Supplementary Table 1.xlsx]

## Sheet: DOWN GENES OVERLAP
622 elements included exclusively in "8226 200nM":	204 common elements in "KMS18 200nM", "KMS28 200nM" and "8226 200nM":	174 common elements in "KMS18 200nM" and "8226 200nM":	166 common elements in "KMS28 200nM" and "8226 200nM":	2077 elements included exclusively in "KMS18 200nM":	1477 elements included exclusively in "KMS28 200nM":	2253 common elements in "KMS18 200nM" and "KMS28 200nM":
RP11-514P8.8	CTC-205M6.5	CACNB2	NBPF4	SDK2	RP11-72I8.1	DDX59
ZDHHC8P1	SCN7A	PPP1R16B	CICP16	CTB-175P5.4	WNT11	CUX2
RIN3	ZNF625	RP11-460N20.7	CTBP2	VAV1	RP11-774O3.3	CTD-3088G3.8
STX1B	RP11-723O4.6	RP11-479G22.8	RP11-164J13.1	SYS1	C11orf89	FGF12
COLCA1	NPFF	CCER2	CTB-43E15.3	RPL29P12	SSH3	SH3BP5L
RP11-809O17.1	ERBB2	NLRP3	RP11-318A15.2	LLNLR-249E10.1	ANKHD1-EIF4EBP3	RP11-347C18.3
RP11-32B5.7	ZC3H12B	DNHD1	RP11-50E11.2	ZNF730	RP11-21C4.1	XRCC3
VIL1	RMRPP2	LCN10	C6orf164	TSSK6	ARHGEF17	RP11-916L7.1
RIC3	RP11-367G18.1	PMS2P10	DNASE1	CLTC	FOXO6	C9orf37
LINC00898	KB-1460A1.5	SLC7A9	KCND3	RP11-115C21.2	A1BG-AS1	AC005387.3
AL021546.6	RN7SL737P	AC116366.5	CDH1	VPS33B	RP11-67L2.2	AC016747.3
LMOD1	PDZD2	ZNF846	NLRC4	NCS1	SH3TC1	MELK
PXDN	SGPP2	TEX12	SOGA3	MAGEB2	FAM83G	AMZ2P1
RP11-439A17.7	AL136531.1	NT5DC4	SLC16A13	WWTR1-IT1	TMEM44	VDR
SYNGR1	FAM132A	CTB-91J4.3	UCP3	HMCN2	RP11-875O11.3	AC096579.1
RP11-394O4.3	CTC-471F3.5	NEURL3	APBA1	PHACTR1	RP11-752G15.9	KLRAP1
MEF2B	C11orf21	OVOL3	RP11-353B9.1	TRIM21	AMIGO1	C3orf83
LINC00565	TOB2P1	CTB-92J24.2	SPATA3-AS1	SNORD69	RP11-46A10.4	LA16c-60H5.7
RP11-20I23.1	NLRP14	PTPRVP	CUBN	RP4-686C3.7	ZNF160	CENPJ
RAB6C-AS1	AC093901.1	AC105253.1	AANAT	CCAR1	RTKN	LINC01002
RP11-484D2.4	SYTL3	PP2D1	C1orf134	CCHCR1	LINC00943	DDX50P1
RERG	GAS6-AS1	RP13-131K19.6	GPR68	RING1	XXbac-B476C20.17	ANKMY1
CTD-2235C13.3	SOCS5P4	RP11-418J17.1	HAL	IGLVIVOR22-1	CTD-2541J13.2	EFNA1
CDRT4	RP11-267M23.4	RP11-574K11.31	AP001579.1	SHANK3	FAM86B2	RP5-991G20.2
AP001187.1	C17orf100	LINC00299	C2orf16	SAMD15	PCDHGA5	RP11-166B2.1
PITX1	HYAL1	THEM5	SMIM14	SNX9	SCHIP1	FRA10AC1
RP11-188P20.3	CCDC136	DUX4L15	POPDC2	CCDC101	RP11-1415C14.4	ARHGAP9
TFAP2A-AS1	Y_RNA	ZCWPW2	AC093162.5	PBX2	UBAP1L	RAB3D
RP11-523L20.2	RP11-187C18.4	RP11-382A20.2	LRRN1	GTF2A1	FAM182B	STX1A
SUSD5	snoU13	RP11-214K3.23	MEP1B	TMEM63C	RP11-457M11.5	OXTR
MPDZ	ITPKB-IT1	RP11-2E17.1	AKR1C1	AC010547.9	PITPNM3	KRIT1
RP1-149A16.17	HR	RP1-8B1.4	ACTG1P1	KLHL7-AS1	TTC28	AC011718.1
HHLA2	RP11-712L6.5	CCDC73	RP11-481A20.10	RP1-95L4.4	AL662800.1	EML5
DYDC2	DHRS4-AS1	SNORD36C	CCDC180	GNB3	LOX	FRMD8
LINC00907	RP11-91G21.1	RP4-607J23.2	HTATSF1P2	RP11-749H20.3	RP11-286E11.1	RP11-498E2.8
RP11-345M22.3	MIR4712	RP11-460N20.4	KCNK7	MTA1	TMEM144	ZNF671
FTLP3	RAP1GAP	TTYH1	ARTN	RNF150	RP11-298I3.1	AC090644.1
CLUL1	RP13-20L14.6	RP11-445H22.3	AC018892.9	ZRANB2-AS1	AC104135.3	TRMT44
BMPR1B	APLF	WFDC3	MSS51	SEPT7P9	NAV3	RP11-618P17.4
WI2-1959D15.1	C1orf228	SLC8A1	CTD-2013M15.1	LL22NC03-N27C7.1	TMEM139	SEMA3C
MYOM3	DRP2	FRMD5	CTD-3110H11.1	RP1-168L15.5	FAM200A	RP11-480G7.1
CMKLR1	C3orf20	RP11-21L23.3	TUBA3FP	WASH7P	C11orf74	EXPH5
GPR82	TUBA8	CEL	C5	ST20	IL9R	PRR12
CTD-2199O4.7	KLHL32	RP11-234A1.1	TNFRSF10C	GEN1	ZSCAN23	TANGO6
LINC00861	ZNF837	RP11-344P13.6	PHKG1	PDE1B	RP1-266L20.2	STON1
DLGAP1-AS5	RP11-355F16.1	SLC25A35	ESRRB	RP11-110H1.4	LINC00638	CHD9
P4HA3	HEATR4	RP11-158M2.5	CCNB3	ZNF271	STARD13	SOGA1
AICDA	RP1-30M3.5	RP11-24M17.4	CAPN3	CISH	A1CF	IQUB
PLB1	MIR641	RP11-723O4.2	CHIT1	SLC22A1	LINC00884	CDCA3
PEAR1	RARRES2	CASKIN1	RP11-27K13.3	ALKBH3	CELF2-AS1	MBD3
SGCA	SNORA45	RP1-80N2.3	MARK2P9	LINC01056	C1orf61	CHST15
RP11-390N6.1	SHPK	CTA-217C2.1	SMTNL1	DNAJC18	AP001046.5	DNAJC6
HTRA4	PKHD1L1	RP11-423O2.1	STAC3	EHBP1L1	RP11-599B13.6	ZCCHC9
IDI2-AS1	FGR	MYO1G	AP001469.7	OARD1	ZSWIM8-AS1	ZBED3
SCUBE2	NEURL2	HRG	RP11-791G15.2	RP11-434C1.1	BLOC1S5-TXNDC5	RP4-559A3.7
CACNA1B	CYP4F35P	RP11-284F21.9	PCDHGB6	C19orf12	RP11-337C18.9	AF131215.8
RP11-701P16.5	ATP13A4	PLAT	SLC26A7	TRIQK	RP11-510M2.2	DLGAP4
RP11-25D3.1	NDUFA6-AS1	AOC2	MYOM1	CTD-2008P7.1	RP11-697E2.6	STAG3L5P-PVRIG2P-PILRB
CCDC79	NARF-IT1	RP11-727A23.1	RP11-505K9.4	RPL7L1	RP1-239B22.5	SOX7
C9orf153	CD160	RP11-548K12.4	DNASE1L3	ARL6IP6	PCDHGA1	DDIT3
LINC00494	BNIPL	PABPN1L	RP11-1008C21.2	RP11-473M20.5	N4BP3	AC009950.2
CLIP3	BDNF-AS	ZNF177	FAM212B	MAGEB17	VASH1	AL626787.1
SLC9A4	RN7SL333P	GIMAP8	SCARF2	ENPP5	ESYT3	AC092299.7
NOS1	RP11-75L1.2	C21orf62	SLC25A45	RP11-305L7.1	APOBEC3H	LINC01053
KB-1440D3.13	JPH3	CTD-2124B8.2	RP5-1148A21.3	RP13-20L14.1	LINC01011	RP11-54K16.2
RP11-87E22.2	RP11-110I1.12	RP11-415J8.5	CCDC154	GRAP	TFEC	RP11-881M11.8
RP11-463D19.2	IQCD	RP1-28H20.3	SLC27A3	ZNF606	CCDC183	ZBTB45
RP5-1050D4.5	RAD51-AS1	ATP8B1	ACRC	KDELC1	KEL	PCDHA1
ACSBG1	AC005943.5	DNAJC27-AS1	AC135178.1	MGST1	SLC29A2	POLQ
RP5-1086K13.1	RP11-334C17.5	GRID1	RP11-353K11.1	IFITM1	ZNF311	UBA7
RP1-153G14.4	RP11-218L14.4	RP11-214C8.2	RP11-481J2.2	RP11-290F20.3	RP4-760C5.5	COLQ
ANK3	TLL1	AC093673.5	FSTL1	TTC9	DLC1	RP5-1121E10.2
FAM66C	KLHL22	RP4-564F22.5	RP11-722E23.2	SNTB2	LEAP2	CTRL
AC008132.13	RP11-55L3.1	RGPD2	EFCAB8	NRROS	ZNF555	RP11-324C10.1
DOK2	RP3-388M5.9	CTD-2611O12.6	FNDC8	GABRP	ZNF609	SLC2A12
CACNA1A	CYP4F26P	VWC2	SERF1A	NPHP1	RP1-179N16.6	SCAF1
CHRNB4	TMEM154	AP003068.9	LINC00441	DMPK	USP30	CHAF1A
KLK2	RP11-215D10.1	RP11-15E18.1	HNF4G	NINJ1	CTC-459F4.1	AD000090.2
CHRD	RP11-159H10.3	CCDC7	CCM2L	MAK16	CCDC113	BCRP2
LINC00959	DOK3	RP11-146E13.4	PCDHGA10	RP11-326A19.4	FAM115D	DCAF8
VWA3A	DNAH1	RP11-1151B14.4	AC024704.2	ARHGAP18	RP11-175I17.2	ACTR8
CNTD2	USP46-AS1	RP11-385F5.5	RP4-740C4.8	TLR2	PDE6C	AC018755.17
RP11-262H14.4	HIGD1B	RP1-257A7.4	C16orf96	CRYM-AS1	METTL20	RITA1
ASPRV1	POLN	GPR61	AP001056.1	MYB-AS1	MDGA1	CYTH2
ASB3	ZNF285B	RP11-1246C19.1	TTC21A	SYS1-DBNDD2	PIP5KL1	RAB24
RP11-274B21.9	RP11-396C23.4	FAM57B	C12orf40	APOBEC2	ITGAM	ZNF788
RP11-362K2.2	GPR156	SPON1	ALPK3	UPF3B	FMO4	ZNF91
DRD4	RP3-462E2.5	SHISA4	RP11-849F2.7	SPC24	RP4-610C12.4	PAIP2B
CYP4F3	BSN	RP11-1348G14.4	CGREF1	C5orf22	RN7SL406P	RP13-104F24.3
RP11-620J15.1	RSPH4A	GJC1	WISP2	IFNAR1	SERPINE3	SLC25A15
RP11-307B6.3	CEACAM21	FP15737	RP5-875O13.6	LIAS	CCDC62	PIM2
GUCY1A2	ZNF75D	LA16c-349E10.1	CST7	ZNF765	CLEC18B	GSG2
RP11-26F2.1	RP11-532M24.1	CYP19A1	NR1H3	MAGI2	GOLGA8UP	RP11-511I2.2
ZBTB45P1	FPGT-TNNI3K	TUBG1P	RP11-559N14.5	RP1-111B22.3	LINC00639	C16orf59
NYX	FOXD4L1	CCDC65	AC006378.2	ABLIM2	RP11-111F5.5	GHRLOS
RP11-342M1.3	CTD-2555O16.2	ZNF222	RP4-584D14.7	AL592063.1	RP11-599J14.2	ETS1
CORIN	AC068580.6	AL450992.2	CTD-2525I3.5	PFN1P7	ZNF774	AC008440.10
AOC3	PEX6	MICD	IQCH-AS1	RP11-254F7.2	MIRLET7DHG	CSTF3
RP11-364P22.1	RP11-227G15.2	LRRCC1	RP11-700H6.2	COLGALT2	CTD-2619J13.9	NUTM2A
NIPAL2	C21orf58	ECM1	MTSS1L	CMYA5	RP11-495P10.9	RP11-142C4.6
UPF3AP3	LINC00963	RP11-296O14.3	CTC-325J23.3	RP11-659E9.2	LGALS4	ZNF275
AC022532.1	BCAR3	LINC00663	DNAH6	SURF2	SYT15	CTC-471F3.4
AP001024.2	CHD5	SLC46A1	RP11-373N22.3	GMEB1	PPP2R2B	CTD-2369P2.5
KIRREL3	VILL	ZNF660	LINC00846	LINC00971	DBIL5P	KIAA0753
AC009495.2	RP3-508I15.21	RP11-304F15.3	ENG	LIPC	NBPF18P	AIMP2
CD247	MIR4477A	RP3-327A19.5	HHIP	RP11-385J1.2	C12orf79	ATP9A
NEXN	AKAP3	KIF7	PKHD1	METTL5	C1QTNF4	OFD1
RP11-286E11.2	RP11-278H7.4	C1RL-AS1	ALG1L	TNFAIP8L1	FMN1	SLITRK5
CEP164P1	RP11-434B12.1	CTC-523E23.1	RP11-149I2.5	SLC25A46	NBPF6	Z95152.1
RNA5SP517	RP11-438L19.1	KCNG2	AL133493.2	RP11-381K20.2	ALOX12P2	CTC-429P9.2
SLC22A15	RP11-165F24.2	ACADL	RP11-802O23.3	TNRC6C	LAMA2	ZBTB38
DNAJB13	GDPD3	C8orf44-SGK3	PTCH2	AC005276.1	OVGP1	C21orf140
AS3MT	RP11-123K3.4	RP11-468E2.4	SLIT3	RP11-513M1.1	RP11-890B15.2	RAD54L
CTD-2523D13.2	ACRV1	GS1-124K5.10	LINC00868	MAP1A	RP11-363E6.3	SNX29P2
AP001623.1	CTD-2541M15.1	TDO2	RP11-554D14.4	RNASEH1-AS1	NEURL1B	ALOX15
DNM3	ZNF404	KB-1572G7.2	RGPD3	NOXA1	AC004980.10	ZMIZ2
EFCC1	CTD-2541M15.4	EHHADH	RP5-1039K5.16	STARD7-AS1	AC097724.3	AC004112.4
AC104653.1	THAP7-AS1	EVPLL	ARMC3	AF127936.5	RP11-451M19.3	H6PD
PDE6B	MAP3K14-AS1	STAT5A	RP4-794H19.4	AC025335.1	CSPG4P12	RP11-67L3.4
SNORA74	RP11-645C24.5	RP11-483P21.2	AC104651.1	TRAV19	ZNF423	RP11-219C20.3
RP11-54O7.2	AC007040.7	MSH5-SAPCD1	AC024560.2	HMBS	CCR7	AC004257.3
COL14A1	RP11-884K10.7	PER3	MKLN1-AS	LTB4R2	RP11-204M4.2	WTIP
ITIH4	RP11-57A19.2	C4B	AC018804.7	AP3S2	FAM131A	GOLGA2P5
CHN1	AC062029.1	RP11-348P10.2	RP11-137L10.6	LIN52	RP11-762H8.2	UGT3A2
NHSL2	AC024937.6	CTD-3105H18.16	NLRP6	MED11	HRH4	DNAJC28
RP4-569D19.5	RP13-735L24.1	RIBC1	AC005154.7	RP11-571M6.15	CTC-448F2.6	RP11-565N2.1
GS1-259H13.10	ERMAP	USP18	GREM2	KCTD20	FAAH	TRAF4
RP1-272J12.1	CTD-3203P2.1	ZNF705E	RP11-353N14.2	AC005324.6	AC138655.4	SAMD4B
SLC4A5	RN7SL381P	RP11-159D12.2	RP11-459F6.3	ZNF688	CTD-2132N18.2	RP11-109N23.6
AF146191.4	KB-1460A1.1	RP11-592B15.3	RP1-148H17.1	CACTIN-AS1	NONOP2	TMEM62
MYH15	ANKRD18EP	RP11-1038A11.3	GNMT	RP11-54C4.1	AC012487.2	SH3BP2
AC007238.1	BRCA2	TESPA1	CTC-277H1.7	ZNF780B	RFX4	AP003068.18
STXBP5L	NLGN3	ZNF559-ZNF177	CTD-2224J9.8	CDH13	ARHGEF39	VIPAS39
CYP3A43	COL5A1	AC018816.3	LRRTM2	FAM174A	RP11-440D17.4	LINC00537
CTA-223H9.9	MLANA	AC097662.2	SLCO2B1	TMEM43	INHBA	CTC-550B14.7
NRADDP	RP11-284M14.1	DCAF4L1	RP1-283E3.4	NLRP1	RP1-90G24.6	RP11-574M7.1
RP6-74O6.3	KIAA1199	RP11-327L3.3	RP11-344G13.1	SLC39A13	RP11-159N11.4	CBFA2T3
AP000477.3	LINC01137	GSDMC	PCDHGB3	SYT3	ULBP1	AP000769.1
PGLYRP3	WDR52	SLC22A9	AGAP8	AC109309.4	GABRA4	HEATR3
AK5	SIRT4	RP3-508I15.18	LL21NC02-1C16.2	KLF7	LINC01096	PARP16
RN7SL360P	AC004985.12	CDNF	RP11-20I23.13	RN7SL175P	ZNF629	RP11-316O14.1
RP11-392P7.6	SPSB2	RP11-539L10.2	PRDM6	RP11-23P13.6	RP11-76P2.4	RP11-337C18.8
PTAFR	SYCP2	RP11-284F21.7	FKBP9	RNF214	IRGQ	GRHL3
ASB18	PGLYRP4	RP11-293M10.2	C16orf98	ORAOV1	HECW1	SLX4IP
AC090186.1	RP4-657D16.3	C6orf223	AC092143.1	FAM27E2	SLC30A8	KB-1836B5.1
AMER2	FAM86HP	CAPN5	ATCAY	MTHFS	RAB3C	CABLES2
COL20A1	AC108488.4	RNF112	WSCD1	OPA3	RP11-142C4.4	RP11-472K22.2
RP11-570L15.2	RP11-458D21.1	MORN3	RP11-637A17.2	RPS11P5	AC010504.2	RP11-705C15.3
CTD-2134A5.4	RP11-646I6.5	RBM26-AS1	ATE1-AS1	CTD-3187F8.11	ESRRG	RP11-881M11.2
COL4A2	AC024580.1	TNS4	CPB2-AS1	OR7E117P	NPIPA2	CTB-114C7.3
AP000473.5	WBP1LP2	CSPG4	RP11-15A1.7	CTD-2349P21.10	RP11-276H19.1	RP11-317P15.4
RP11-368M16.3	ZNF8	CTD-2587H19.1	SRP14-AS1	TMEM119	RP11-231C14.4	TTC12
RP11-379C10.1	RP11-187C18.2	SV2B	RP1-283E3.8	UBLCP1	CTD-2232E5.2	TK2
CDHR5	KCNJ14	ARL11	RP1-102H19.8	SP3P	FBXO27	FAM157A
AHRR	AC073415.2	APOBEC3D	AHCYP2	IFITM3	BCAR1	MUM1
CRB1	SPIRE2	GIMAP5	TMPRSS13	ANKUB1	RP11-343C2.7	SLC35E2B
HS3ST5	SAPCD1	ZBTB47	NEK5	ZNF100	C1QTNF3	RAB37
HECW2	ATP6V0E2-AS1	RP11-284F21.10	NPIPB6	EME2	AC009948.5	RP11-267N12.3
SPACA6P	RP11-10N23.2	AP001062.8	RP11-580I16.2	DHTKD1	TTC36	RP5-901A4.1
CLEC3B	RP11-421L21.3	RP11-359B12.2	RP11-723O4.9	LRR1	C2orf81	ZNF57
CTD-2313N18.7	NPR2	RNF43	RPS2P32	DUOX2	RP11-460N11.2	C2orf48
WI2-85898F10.1	MATN1-AS1	FAM218A	ALS2CR12	CTD-3018O17.3	TNRC6C-AS1	AGFG2
FRMD1	BBS12	CACNA1C-AS1	MYLK	KIF20A	AL049542.1	RN7SL809P
AC010729.1	TMED7-TICAM2	WDR78	CTBP2P4	RN7SL637P	PRRT1	AC005841.1
MTX1P1	ANKRD31	HLA-V	RP11-219B4.5	SLC25A29	TGM5	PGBD4
BCO2	FAM186B	C2orf72	CLEC4A	RDH13	TFAP2E	KIAA1217
RP11-466F5.8	DLK2	BCAN		WDR65	FBXO40	AC009961.3
BCL6B	CEP19	MATN1		RP5-977B1.7	SUSD2	SLC25A25
AL050321.1	RP11-461A8.4	TRIM16		RP11-19N8.4	IQSEC1	RP11-431K24.1
BGN	RP11-33B1.4	RHOU		PHKA2-AS1	SORBS2	IFNG-AS1
AC092316.1	AC000123.4	RP11-375H19.2		EMP1	RP11-383C5.5	GPR55
APOF	WNK4	SIM1		RP13-455A7.1	AC005618.6	METTL21A
RP11-566K11.4	RP4-813F11.4	RP11-181G12.2		RP11-564C4.6	XX-C2158C6.3	HMGXB4
CTD-2600O9.1	RIMBP3	KCNA6		C17orf51	FAM26F	FGF14-AS2
AC011515.2	RP11-496I2.6			BPNT1	MROH5	OGG1
TRPV6	UNC5CL			RAB10	RP11-425A23.1	FBXW12
ZNF300P1	ZNF155			NCF1C	KIF9-AS1	FBXL18
SLC13A3	C21orf67			AC006539.4	RP1-74M1.3	ALDH1B1
FAM46A	TREML2			RP11-318E3.4	RP11-16P6.1	FAHD2CP
RP11-553L6.2	TRPM2			SLC15A2	CYP3A7	RP11-548H3.1
FERMT2	RP11-88I18.2			C10ORF68	RP11-685A21.1	CTD-2554C21.2
MOBP	TRIM34			NCF1B	KLRB1	PXN-AS1
RP11-15A1.2	GPR75			RN7SL156P	FBXO36	AC009120.5
CTB-43P18.1	BACE1			ENAM	CNTNAP1	SEC16A
DSCAML1	MOCS3			TFB1M	LINC00707	MPV17L
DAAM2	PPP1R10			COIL	RP11-794P6.6	ANKRD23
RP11-136H19.1	THSD1			SNRPGP14	FOXH1	C19orf71
KIAA1407	CCDC110			AC011738.4	VN1R1	RP6-74O6.2
RP11-82L2.1	RP11-206L10.1			CEP85	CTD-2007L18.5	RP11-564D11.3
ARHGAP24	RP11-177C12.1			AC005391.2	PCDH12	DNM1P47
KLHL6-AS1	KIAA1107			CXorf30	TSPY26P	TPPP
LILRB1	U47924.30			SARS2	AC138035.2	GATSL3
LYST-AS1	PAQR8			RP11-506M12.1	TECTA	TRMT10C
CTD-2516F10.2	RP11-448G15.3			TET1	LMO2	DDX20
PTPRH	ZNF747			C16orf58	FAM27E1	NLRP7
ZNF709	RP11-27I1.4			AGL	PCDHGA7	CCDC77
RPL23AP53	KRCC1			RN7SL351P	FAM215B	RP5-1021I20.2
C4orf26	XXbac-B461K10.4			FLYWCH1	WDR64	ZNF341
RNA5SP440	MIR570			CMC1	QRICH2	AC010524.2
EFCAB12	FBXO10			AC137932.1	RP11-1277A3.1	LONRF1
FCER1G	AF001548.5			RN7SL781P	PEX11A	SUGP1
RP11-137H2.6	ZC3H10			FAM53B	TLR9	TRAPPC13
KLHL29	ZNF835			CRLF2	RP11-96D1.10	FANCE
RP11-483I13.5	RP11-71H17.9			GTF2H3	ARVCF	AC025171.1
RP11-245M24.1				RP11-708J19.2	LZTS1	UPK3B
GPR110				RP11-155G14.6	FAM182A	TNPO2
RP4-792G4.2				RB1	SYT2	DOCK9-AS2
CDC42BPA				FRAT1	C6orf163	PCGF6
TMEM74B				RP3-500L14.2	RP11-562A8.4	CEND1
RP11-848P1.5				CTD-2342J14.6	VMAC	CFL2
MUC4				RP11-646I6.6	ST6GALNAC3	CTD-2031P19.3
RP1-68D18.4				RP11-134O21.1	HMSD	RP11-45P15.4
AL391380.1				PPP1R9B	KRT18P41	NLRP4
AC073130.3				ARHGEF38-IT1	RP11-256I9.2	KCTD18
CYP21A2				ZFP82	RP11-589F5.4	WDR91
CYP27A1				TAS1R3	HNRNPA1P16	CTD-2021A8.3
DGCR9				LYRM5	RP11-656D10.6	SSX7
CLEC18A				GALK2	FAM131C	CTB-32O4.2
FAR1-IT1				PLA2G12A	RP11-309H21.3	LMO4
RP11-540O11.1				VNN2	RP11-154D17.1	TRIM66
RP11-39K24.7				RP11-348J24.2	VIM-AS1	GRK5
RP11-543P15.1				RNF219	NPIPB11	RP11-492E3.51
GRIN3A				ZNF490	AC069213.1	ZFHX2
TMPRSS3				GRIA4	SPAG8	TMEM262
ADAM29				RP13-131K19.2	RP11-423O2.5	UFSP1
CORT				EXOC6	RP11-148K1.12	BMS1P5
KDM5B				PPIL1	AC069277.2	MOSPD1
SYNPO2				RP11-477H21.2	RP11-83N9.5	CTC-471F3.6
RP1-178F15.4				LTBP4	ME3	CTC-524C5.2
ITGA10				AL359709.2	PTPRB	ASB14
RP11-4E23.2				NUCKS1	RP11-108F13.2	RP11-167J8.3
TNFRSF11A				BCAT2	AP001266.1	PLEKHH3
AP001631.1				EIF1B	TNFSF13	EOMES
NXNL1				RP13-516M14.2	NINL	C11orf71
CYP4A11				LPP-AS2	BTG4	STARD5
GRIP1				GNL3	RP5-1061H20.4	TMED8
CTA-357J21.1				RP11-680F8.1	ADCY10	CCNYL2
ARSF				LINC00998	SULT1A2	MUTYH
DBH				RP11-389O22.1	PLEKHS1	RP11-561B11.6
CTD-2165H16.4				EPS8L1	DNAJC3-AS1	RP11-552M11.4
HTR5A-AS1				CTD-2666L21.1	DPY19L2P1	MAGEF1
AC004893.11				RP11-933H2.4	IGLV2-11	APOL2
RP11-325N19.3				C4orf19	SMO	RP11-152N13.16
GPRC5A				AC005484.5	MMP25	PDZK1P1
CHGA				ZNF726	C16orf52	CNBD2
PRICKLE2				RAD17	GUCA1B	LARP4B
RRH				CELSR1	AC005329.7	NFIX
OSBP2				DLEU1	LRRC6	RN7SL357P
BASP1				RP11-138H10.2	MRVI1	NUTM2B
C2orf88				ANKRD30B	DNASE1L2	AMT
RP11-253M7.1				RP11-804A23.2	C9orf173	BGLAP
RP1-27K12.4				HAUS8	NPIPB3	HSCB
RP11-474G23.1				RP11-439L8.3	RP11-327P2.5	KB-1980E6.2
RP11-763B22.4				RN7SL114P	RP11-565P22.6	ST6GAL1
ALS2CL				ALKBH2	NR1I2	RP11-927P21.5
C8orf17				SRR	BEND3P3	ISY1-RAB43
RNU11				FAM83H	DDX39B-AS1	HIF1AN
RP11-151A6.4				PCDHB7	ROPN1B	AC012442.6
ITGA2B				UCA1	ADPGK-AS1	RP11-9G1.3
AL121756.1				MND1	ATP6V1E2	RP11-392E22.12
RP11-661A12.5				DHX57	ACP5	RP1-118J21.25
PLOD2				PLA2G4A	RP4-730K3.3	LZTR1
CTD-2185K10.1				MRPL45	ITGB2	EIF4HP2
RP11-64C12.6				MEGF9	C22orf46	ZNF584
NPPA				AC105339.1	TMCC1-AS1	SGSH
RPL7AP10				ABHD17C	LY75-CD302	MLLT6
ERBB4				GK	DFNB59	C6orf120
CELF6				EPX	MS4A15	MAK
CAPN13				ZNF667	EPHX2	RP11-534L6.5
RP11-383C5.3				IL10RA	AC004840.9	RP11-431N15.2
RP11-157B13.7				KRR1P1	RP11-386G11.10	ZNF775
AQP9				PHACTR4	KLK14	TXNDC11
RP3-395M20.8				ST3GAL4	LRRC37A6P	RP11-434D2.3
LRRC39				AC005301.8	RAB11FIP4	LINC01152
GUSBP2				ST3GAL6	FHOD3	FAM216A
RP11-158I13.2				RP11-95I16.4	ARHGEF40	CSK
AC024592.9				PCID2	FRMPD3	RWDD3
SLC16A8				MARS	AC129492.6	ZNF497
SMOC2				SLC17A7	MUC19	CCDC125
AMBP				RNF2P1	MOCOS	AC006538.1
AP003774.6				LYPD6	IL17RB	NAGK
ZCCHC18				TRIM45	RNA5SP283	INTS8
PCDHB10				UBTD2	C14orf39	DKFZP779L1853
CLDN16				SLC24A4	DQX1	TBPL1
CTD-2561B21.11				RP11-440L14.1	GGT3P	SAMD9L
RP11-54O7.1				OSTM1	PSD3	DEPDC1
RP11-390F4.3				SEC22A	PTPN3	CAMKK2
RN7SL477P				AC104809.3	RP11-756H6.1	KCNRG
KNOP1P5				AC005042.4	PWAR6	FTSJ2
SMIM17				AC010642.2	RP11-95P2.3	RP11-15H20.6
C14orf105				ZNF518B	NPM2	ARFIP2
AC020743.2				MAL	RP11-345P4.7	ZSCAN21
AC021224.1				RP11-1084E5.1	ENOX2	MERTK
AC002076.10				KNOP1	AP001442.2	CTD-2116N20.1
BTBD3				RP11-532F6.3	TLE2	NAIP
LINC00930				FLT1	CTD-2621I17.6	MASTL
ZAN				AC010082.2	DLGAP3	SLC7A5
NKPD1				RP11-806L2.6	ERMN	MEF2BNB-MEF2B
FAM153C				SLC28A1	RP11-38J22.6	KIN
LINC00202-1				MIR503HG	ST3GAL3	RP11-499P20.2
KAL1				GOLGA8G	AC005077.14	KDM4A
DAPK2				SLC51A	RP11-297D21.4	RFX1
GSDMB				TPH1	HKDC1	USP27X-AS1
VSX1				ABC7-42389800N19.1	RP11-258C19.4	LINC00996
SNORA80B				SLC35G6	SPATA41	RP11-793H13.8
ENPEP				AL590489.1	TEX21P	PALB2
AC079354.3				RP11-395C3.1	RAPGEF4	PDIA3P1
RP11-69C13.1				RP11-426A6.5	TEC	AC016773.1
RP11-174G6.1				CCDC130	TYRP1	VPS54
RP11-120I21.2				CNOT10	RP11-810M2.2	RP11-498E2.7
ABCA8				THAP6	STEAP3-AS1	CTB-119C2.1
TAGLN2P1				PIK3R3	RP11-452L6.5	RP11-356I2.4
MAGEA10				AC068580.5	MOB3B	RP11-290L1.3
CDH4				PRPF38B	FAM86FP	SLC25A11
TTC18				CTA-445C9.15	CTD-2353F22.1	CFHR3
RP11-496I2.2				CDKN2B-AS1	KCTD21-AS1	EGLN1P1
RGS4				AAED1	OPRL1	CTD-3065J16.9
RP11-278C7.1				FUT2	DTX2P1-UPK3BP1-PMS2P11	TTC8
C6orf183				SCMH1	AC007970.1	PRMT3
RP11-255C15.3				CT60	RAC1P2	ORAI2
MT-TF				RFT1	AKNA	ZNF646
RP11-300M24.1				RABIF	ROBO1	FAM69B
AL772307.1				UGDH	FLJ00104	MAP7D3
MSTN				RP11-274H2.3	C17orf99	TMEM104
LONRF2				ABR	CICP27	SIRT5
AC009303.3				ZNF836	AC090945.1	SLC9A1
AC020594.5				CCDC144CP	PCDHGA2	RHBDD1
RP11-298D21.1				KIF2C	SYT1	AP4M1
AC104389.28				DMD	CCDC183-AS1	TUG1
CYP39A1				ZNF18	LINC00880	CUZD1
C15orf38				PDE6D	GUCY1B2	ZDHHC13
PHLDB2				OAS1	RP11-399K21.14	CWF19L1
EIF2AP4				DMWD	RP11-353N14.5	ELMOD3
RP11-2C24.4				IL13RA1	FSD2	ZNF266
RP11-97O12.7				TCL6	CTB-161M19.4	WDR82
CASQ1				GTF3C1	SARM1	CTBP2P6
RSPH10B				RP11-867G23.10	RP11-293M10.6	TMEM254-AS1
BDKRB1				AP000356.1	RP11-563J2.2	RP11-203J24.9
RP11-651P23.5				DPYSL2	FKBP10	IL12RB2
Z83840.1				RP1-85D24.1	P2RY6	RP11-556O15.1
AL139328.1				RP1-224A6.3	EFCAB13	TMPRSS5
RP11-996F15.2				RP3-406A7.7	PAIP1P1	APOL3
TMPRSS4				FAM160B2	LANCL3	ZNF865
WDR11-AS1				TCTA	RP11-78O7.2	FOXP3
GAREML				CABP7	MST1R	CBX2
CYP4F12				FMNL3	KCNQ4	RP11-795F19.5
RPL7AP64				KCNE1L	TPO	CTD-2574D22.2
RN7SL190P				CSGALNACT1	KCNK15	ZNF251
AC006369.2				GGTLC2	GLYATL1P1	SNORD19
BMPR1A				AL356475.1	TRIM2	CTC-436P18.1
AL122127.25				CTPS2	SMIM5	CTD-2001C12.1
CEP170P1				RP11-156L14.1	RP11-250H24.2	RP13-582O9.7
PABPC1L				MFHAS1	FRMPD2P1	WDHD1
RP11-245J9.4				RP11-335K5.2	RP11-649G15.2	ZNF720
RP11-321F8.4				AP001625.6	RP11-13J8.1	FAM66A
ARHGEF9				RP3-475N16.1	AC027269.2	PDDC1
AL354898.1				MIR3179-3	RP4-740C4.6	FAT2
CBX3P4				RN7SL216P	GSTA4	RP11-77P6.2
SLC1A2				NRIP3	LDB3	RP11-263K19.4
LRRC71				RP11-311D14.1	RP11-168A11.4	PLAC8L1
C10orf11				SUZ12	BFSP1	SUPT20H
RFPL3S				KLHDC1	RP11-96K19.5	WNT5A
RP11-458D21.6				RP11-1021N1.1	ECT2L	SIK2
RP11-536L3.4				RP11-345J4.3	AOAH	AC002310.12
PDE4C				AP001024.1	AC034228.7	TMOD4
RP11-104G3.2				ADO	CITED1	CTC-429P9.3
IDUA				CTD-2555K7.4	FA2H	ZNF224
RP11-558F24.4				NACC2	AC005609.1	ZNF212
AC069278.4				POP4	CTD-3064M3.7	ELP5
RP11-553P9.2				SEMA3D	LGALS8	L3MBTL1
FARP1				RP11-744K17.2	RN7SL613P	KCNJ16
RP11-305M3.2				RP11-435O5.6	HCCAT3	LINC00094
RP11-63M22.1				PLXNC1	S100A1	RAB9B
RP11-407N17.4				RP11-703I16.1	RP11-567M21.3	TRAF3IP3
MIR3179-2				RP11-122C21.1	TGFBR3	BRF2
AC073063.10				FAM35DP	RP11-307E17.8	CTD-2331H12.7
USHBP1				RP11-347C18.4	RP11-973H7.4	CAMTA2
PTPN13				RP11-588H23.3	PLEKHA3P1	NFKBID
TUSC3				FAM27A	RP11-364P22.2	NCR3LG1
TCEAL3				SETMAR	RP4-760C5.3	CEP95
CARD14				ABCD2	CDR1	AKR1D1
RDH8				RBM22P2	CTD-3199J23.6	ARHGAP27
COCH				PDF	RP11-60I3.5	RP11-10L12.4
EIF4BP6				ZNF230	CALML4	XRCC4
RP11-496D24.2				RP11-335G20.7	CCDC87	RAB3A
STEAP4				AC092594.1	TEKT4	CASP3
LY6G6C				TECPR1	GRM4	NUDT19
ZBTB7C				RP11-22N19.2	NSG2	TRIM56
SLC35D2				UBE2J2	FLG	CKMT2
DLGAP1-AS1				TUBG1	RP11-374M1.2	AP000654.4
RP4-755D9.1				RP11-430N14.4	RP5-1068B5.3	XXbac-BPG252P9.9
THPO				CTC-513N18.7	MZF1	HMGA1P8
RP11-271F18.4				PPP2R3B	RP11-242D8.2	LRRC4C
FITM1				LRRK1	COL4A3	C1orf109
RP11-453O5.1				ZC3H3	PALLD	AGAP2
RP11-182J23.1				RPL23AP64	CTD-2132N18.4	SNX19
NLRP9				TOX2	TAL1	CTD-2201E18.3
GRASP				ZNF564	AC010525.6	FLT3LG
RP11-286B14.1				RP11-7G23.4	RP11-326I11.3	ARFRP1
DCT				RABEPK	RP11-973H7.3	GUCD1
MYCBPAP				TTC25	RP11-431M7.3	C2CD4D
CTB-129P6.11				KRT80	RP4-756G23.5	COQ7
RP11-616L12.1				RP11-310P5.1	ZNF630	LRSAM1
RP11-354M1.2				RORB	VSTM1	PIP5K1A
RP11-383G6.4				XPNPEP3	AL513477.1	RP11-1280N14.3
ADH6				CTD-2369P2.2	RP11-497H16.7	UBE2V2
TP53TG3				LYRM7	RP1-130H16.16	KRBOX4
TSPAN32				CLIP4	IL9RP3	PXDNL
AC024937.2				ACTL10	CTD-2210P15.2	CICP14
LINC01016				SELO	GS1-124K5.2	NPIPA3
RP11-345P4.10				JMJD7-PLA2G4B	RP11-554D14.2	TMC8
RP11-277L2.4				AMDHD2	TMEM51	ANXA9
RP11-389C8.1				AC046143.3	RP13-991F5.2	RP11-313P13.4
RAB42				ARID5B	CCR3	ZFP41
RP11-217B7.3				ZNF335	COX4I1P2	CCDC17
LINC00304				CTC-378H22.2	KIF3C	RP11-415J8.3
AC018462.3				TRIM23	ZNF192P1	SDHAF2
RP11-603J24.9				UNC50	RP11-261C10.3	RP11-638I2.9
IGFBP7				DHODH	NPIPB9	PHF11
CRIP3				RP11-316M21.6	RP11-462G22.2	GRAMD1A
EVL				WRAP53	DCDC2B	MBTPS2
SORL1				ACCS	RP11-314A20.5	ULBP3
RP11-168K9.2				REM2	RP11-517C16.2	FBXL19-AS1
C10orf67				RP11-473I1.6	RP11-2C24.6	KCTD13
AP001059.5				TLR7	TTC38	P2RX7
RP11-452L6.1				CTD-2196E14.6	RP11-814E24.3	AL021068.1
FAM180B				PVR	RP1-90J20.12	CTD-2006H14.2
NHLH1				RP11-690C23.2	LRRC8A	RFTN1
RP11-182J1.13				RP11-384E22.1	KCNQ1	CREB3L3
CTD-2288O8.1				C14orf93	CTD-2619J13.8	TRMT2A
LINC00266-4P				AC006014.8	TDH	RP11-517A5.4
RP11-339B21.13				THADA	AC007249.3	ADSS
HEXA-AS1				PTGS1	TGM1	SH2D5
HCG20				CTC-425F1.2	RP11-282O18.3	FBF1
ESR2				SPG11	MBTD1	CDH26
AE000662.92				RASGRF1	CDH23	DIS3L
LINC00944				RP11-73B2.6	C2CD5	DOLPP1
GRM7				RP11-678B3.2	PCSK4	ZNF583
KIAA0125				RP11-678G14.4	RP11-344P13.1	S1PR2
RP11-279N8.1				TOM1L1	AC007362.1	ZNF146
THBS3				RP11-395A13.2	NUDT7	CTD-2008P7.9
ASZ1				GRPEL2-AS1	DNAH10	PUS1
PIWIL2				PRPF3	FCRLB	WNT10A
VAT1				WDR96	AP000347.4	DCHS1
AC074212.3				KCTD19	RP13-39P12.3	SIRT3
MECOM				DNAJB12	RP13-297E16.5	RPH3AL
RNF144A-AS1				AC010761.8	CDRT15	RP1-101K10.6
RAP2C-AS1				RNF219-AS1	PHYHD1	AURKB
RP11-154P18.2				SMCO2	LRRC2	PRICKLE4
CTC-273B12.8				TNFAIP8L2	TRIM9	C17orf62
RP11-112L6.3				TRIM27	C5orf17	TBC1D16
AC012360.6				DDB2	CSTF3-AS1	STX5
LINC00330				SULT1C2	AKAP12	MTRF1
ZDHHC20-IT1				CTU1	RP11-227D13.1	C5orf55
FHL2				ODF2-AS1	CHRNG	CENPV
RP11-203M5.7				WIPI1	IGHA2	RP5-1112D6.4
TMEM108				RP11-245P10.4	PIK3CD	RP11-81N13.1
RN7SL784P				ZSWIM1	IL17RD	ADAT1
LCTL				THRB-IT1	RNF183	USP32P2
AC108004.5				RP11-77K12.5	C1orf170	SSC5D
MYL2				RP11-754B17.1	RP11-834C11.3	FAM35BP
METTL21EP				GOSR1	KIAA1377	TSG101
AC005534.8				AC093495.4	TMEM169	RPA2
HSD11B1				ANKRD62	RP11-311C24.1	MPI
RP1-46F2.3				TMEM234	TADA2A	CTC-260E6.10
CCDC74A				PTPRU	WNT16	FAM53A
AL591806.1				CTB-60B18.10	STC2	LRRC37BP1
C19orf57				BCL9L	AC005682.6	DSE
RHPN1-AS1				CTC-492K19.4	RP4-548D19.3	RP11-526I2.5
RP11-546K22.1				RP11-188D8.1	HCG4P11	CBX3P2
RP5-1198O20.5				TBRG4	SLCO4C1	INTS2
BTNL10				RP11-373L24.1	NANOG	C21orf37
MIR205HG				PTGER4P2	C17orf107	RP5-1126H10.2
RP11-626G11.5				RP11-90P5.5	GMIP	ADM2
JPH4				PDE9A	ZNF287	PMCH
AC226150.4				KCNMB3	RP11-23P13.7	HCG18
ARHGEF16				ORC1	RP11-409K20.7	CREBZF
MIR3654				TBC1D28	WBP2NL	L3MBTL2
RP11-649A18.4				GABRE	TJP3	TMEM194A
AC096669.1				AP4B1-AS1	BMF	SIMC1
SYNE4				WASL	RP4-734P14.4	GPC2
MYH3				SBSPON	SMPD3	RP11-101E13.5
RNY3P8				RP11-343H19.1	PCDHGA8	ENDOD1
CTC-260F20.3				TRIP11	RP11-387D10.2	IGKV1D-17
CEACAM22P				LINGO2	LINC01001	LINC00265-3P
RP11-44N21.4				AC012065.7	RP11-395L14.4	GIMAP2
AC068831.10				C7orf13	RP11-483H20.4	KIAA1919
AF011889.2				SELPLG	MATN2	RASA4B
RP11-677I18.3				CASP16	RP11-863P13.4	LMAN2L
AC079753.4				SLC35G2	TMTC1	TRMT61A
C17orf78				RP11-434D2.10	CTB-25B13.13	LRRC17
ANKRD26P1				ZNF674	HCG25	ORC2
HNMT				KAZN	AC104135.2	TMEM138
NTRK1				CCDC157	AC007192.6	AC007000.12
PAOX				CTC-251D13.1	C2orf44	SCN2A
TF				POU2F3	HSPBAP1	OAZ3
DLGAP1-AS3				RMND1	LINC01021	VPS52
RP11-508O18.1				C11orf72	AL049840.1	MBNL2
TPD52L1				ZNF418	TP53TG5	RPP38
RP11-462G12.2				TCN2	LINC00271	RP3-486I3.4
CAMK2D				SMTN	CRYZP1	PPFIA3
RP11-266A24.1				EBAG9P1	SLC24A1	AC007292.3
KRTAP5-AS1				ARHGAP25	EXOC3L1	RP11-465N4.4
ALDH2				AC007099.1	AXDND1	RP11-94I2.4
AF131215.3				PCDH11Y	LINC01099	CLEC2D
RP5-1139I1.2				ALG6	RP11-638I8.1	FAM86DP
RP4-657D16.6				VCPKMT	AJUBA	FBXL12
RP11-772C9.1				MIR4754	RP11-56M3.1	ARHGEF2
SLC35F1				EAPP	NFE4	METTL2A
GGACT				RNFT2	RP11-206L10.5	FAM78B
PCDH10				RP11-962G15.1	RP11-848G14.2	PMS2CL
CBX3P5				CCDC90B	AC098820.3	RP11-5C23.1
KCNK3				SMARCB1	LINC00939	C5orf28
AL035252.1				PLXND1	NEB	RFX5
NRN1				C5orf27	RP11-435O5.4	XRCC2
FAM197Y3				BMP6	TSPEAR	LL0XNC01-250H12.3
ACTN3				ZNF366	LENG8-AS1	CROCCP2
SPACA6P-AS				FOXJ2	RP11-220I1.1	RP3-329A5.8
AL163193.1				RP11-43F13.1	CCDC147	FAM132B
AC022182.3				IGHV4-34	RP11-98D18.3	C17orf59
RP11-49C24.1				CTD-2031P19.5	TRIM6	C7orf43
CTD-2313J17.5				VIMP1	HERC2P10	PAAF1
RP11-161H23.9				SCML2P1	HNRNPLP2	C18orf21
CYP8B1				BTLA	MCIDAS	RP11-545A16.4
RP11-357F12.1				RP11-376O6.2	GORAB	AP5S1
CTA-481E9.3				RP11-727A23.4	FSTL4	TMEM55B
AXL				RN7SL395P	RP5-1142A6.9	NAV1
RP11-2H8.2				AC003956.1	KRTCAP3	ZFP64
ZGLP1				PACRG	AC015849.19	RP5-1125A11.1
FAM83H-AS1				AKR1B1P4	LINC00511	FBXO46
GLIPR1L2				MESDC2	HOXA-AS3	CHADL
KIAA0319				SGSM1	CHRM3	TNKS2
TUBB8P1				ZFHX4	SOAT2	FAM78A
HNF1A-AS1				DIMT1	SLX1B	GGNBP1
RN7SL576P				RP11-624G17.3	AC084219.4	TERF2
LRRFIP1P1				RP11-315O6.1	RSAD2	AC005224.2
RP11-625I7.1				GDPD5	RP11-314M24.1	ZSCAN5A
SPOCD1				CTC-559E9.5	RP11-251G23.5	HCN3
RPL13AP20				SLC16A4	TNS1	RP11-435I10.3
RN7SL650P				STMN4	ZNF676	KIAA1671
PLA2G2D				SCUBE3	RP11-548O1.3	ZNF416
OR7E7P				AC016745.3	CCDC92	PKIB
RP3-413H6.2				NEDD9	RP11-61A14.3	PPP1R21
FKBP6				CTD-2530N21.4	C15orf38-AP3S2	CCDC51
RP11-17A1.3				BCL2L1	WEE2-AS1	BIN2
RP11-296A18.5				ARL3	JRK	GSKIP
RP11-388C12.8				LINC00664	KCNIP2	AC132872.1
RP11-59E19.4				RP11-173M1.4	LRRC56	RP11-262H14.1
LPO				LMOD3	AC027228.1	RP11-442N24__B.1
PROX1-AS1				RP11-142A23.1	RP11-360L9.7	TRAK2
SCXA				GNG3	GIMAP1	CACNA1C
SCNN1B				LHFPL3-AS1	RP5-821D11.7	OGFOD1
WDFY3				UTP23	RP11-274H2.2	RP11-839D17.3
CCDC38				KCNH4	DTX4	ZNF70
RP11-504P24.3				GUSBP5	CD226	DNAJC17
RP11-384P7.7				RP11-797H7.1	SNX18P15	ATP2C2
RP11-575L7.8				SKOR1	CTD-3131K8.2	ZNF282
PYY2				CTB-113P19.3	SLC9C1	RPP14
CTC-471J1.8				CEP41	THBS1	RP11-218M22.1
STK31				LMLN	ROCK1P1	SAMD13
RP11-530C5.2				RP11-129K12.4	PIP5K1B	EEFSEC
TRIM73				ZNF442	CTD-2545M3.6	COQ5
COL22A1				HSD17B1P1	AC062028.1	CEP68
RP4-592A1.2				TTC3P1	TRIM5	VCL
ZMAT1				SAPCD2	SENP8	GLYATL1P3
YJEFN3				FDX1L	ZNF138	RFC4
SSX8				RP11-380L11.4	SLC6A4	NPIPB5
ONECUT2				RP11-661A12.7	NOXO1	CDKN2AIP
KCNC1				RP11-56B16.2	KCTD5	ZNF543
FER1L4				CTC-559E9.8	AF207550.1	LIMD1-AS1
AC130709.1				H2AFY2	AC091633.3	IRF8
MAGI2-AS3				GRM3	MIR4502	RNF111
CPT1C				ADCY4	PYGO1	NEU3
RAI2				TPTE2P1	DPEP3	ZNF449
RP11-1055B8.7				QRICH1	IFT88	PIANP
KCNH5				AC004410.3	ZBED3-AS1	EID2
BTBD19				AC022819.3	RP11-325F22.2	BCL2A1
KIAA1875				TTC13	NFAM1	RP4-669L17.10
RP11-443B7.1				COL6A4P1	RSL24D1P6	MLKL
ZNF585B				TPM3P8	CDR2L	RPAP2
AL590452.1				CTD-2547G23.2	RP11-844P9.2	SLC30A4
DNAH12				RP1-85D24.3	LRRC37A9P	RGS14
RP11-262H14.3				DHX16	TMEM106A	MRPL49
RP11-1143G9.2				C5orf51	RP11-3D4.3	SPDL1
CETN4P				CBX5	RP11-977G19.5	C14orf79
RP11-1376P16.1				ARFIP1	CLDN7	MIR3150A
ZNF618				SLC12A6	RP11-84C13.2	UCK1
RP11-331F9.3				RP1-313I6.12	YWHAQP5	NEIL1
RP11-87H9.3				FKBPL	CTD-2514C3.1	CTA-445C9.14
RP11-1399P15.1				RP11-30P6.6	NBR2	CSNK1D
CTLA4				NAT1	LINC00842	NR1I3
RP11-517B11.4				FOPNL	RP11-458F8.4	TBC1D3
NLRP12				C12orf73	CCDC149	RP3-402G11.28
RP11-480G7.2				C16orf89	DNM1	ZCCHC2
FAM214B				AC073128.10	CTD-3138B18.6	MRPS31
AC105316.1				OR2I1P	TRAF2	SETDB2
CTB-52I2.4				ZNF431	DMRT2	DSTNP1
AC003079.1				JAK3	PRG2	RP11-411B10.4
EPHA8				RP11-1167A19.2	GEMIN7	TOP3A
RPS4XP17				AC007405.6	RP1-149A16.16	RP11-666A8.7
ENOX1				ABCA3	RASSF8-AS1	MAST1
RP11-798G7.7				RP11-276H19.2	CTD-2357A8.3	RP1-13P20.6
TCAM1P				SLC12A7	FRRS1L	TTLL12
RP11-356J5.12				FASTKD1	MIR1587	RP11-326C3.14
GPR83				DHRS9	KIAA1211	ESRP2
DNAJC5B				RP11-91K9.1	C1orf100	LCA5
USP26				RP11-114M1.2	RP11-435B5.5	PROX2
TP73-AS1				RP11-159F24.6	RP11-680F20.10	WFDC12
RP4-740C4.9				ZMYM6NB	RP11-313J2.1	RABL2A
FCHSD1				RN7SL774P	ATXN2	RFESD
SLC26A8				RP11-686D22.4	BACH1-IT2	RP11-413E6.7
CTC-265F19.2				BLOC1S4	RP11-10K16.1	ZNF680
NPAS2				NPIPB1P	CTD-2035E11.5	MFSD4
RP11-756P10.2				LINC00086	AP3B2	RNU1-103P
GJB7				LINC01150	RP1-90G24.10	NNT-AS1
HMGB3P22				RP11-155G14.5	CASP7	SH3GL1
RP11-572C15.6				TAS2R19	SEMA6C	C2orf43
CTB-75G16.1				RP11-717H13.1	RP1-13D10.2	FBXO18
ATP2B2				LRRC41	AC100830.3	RSPRY1
MIR590				ATP8B5P	RP11-391L3.1	GPR133
IFI44				RP11-445P17.8	RP11-458F8.2	FARSA
RP11-886D15.1				TRIM72	AFAP1L1	RAD9B
				RP13-685P2.7	KCNMB4	AP006621.1
				SLC22A31	RPS20P33	TECPR2
				ARL14EP	HBG2	AF131216.5
				ZFYVE19	PRPF40B	WNT3
				hsa-mir-335	LA16c-OS12.2	NEK8
				MALSU1	SLC2A4	SBF2-AS1
				RP11-393M11.2	RP11-1379J22.5	RP11-57H14.4
				GPR56	ABCD1	HCG4
				DLEU2L	ZNRF3	AGO4
				PI15	MCTP1	RP11-488C13.6
				TIMM10B	TNK2-AS1	OXLD1
				VKORC1L1	FOXD4L3	RP11-428J1.5
				RP11-234B24.4	GYPE	FBXO38
				POMT1	RP11-255C15.4	RP11-46D6.1
				AC007773.3	SATB1	SWT1
				MAPK15	RPS6KL1	GEMIN2
				CTD-2330K9.3	SLC24A5	RBM12B
				IFIH1	TLN2	SLC16A6
				CLDN20	RP4-614O4.11	HDDC3
				CALN1	C10orf53	ULK1
				UBE4A	BMP7	MRPL17
				RP11-242F24.1	HS3ST4	FAN1
				AC104395.2	NRXN2	DNAL4
				RP11-483M24.2	RP11-1166P10.1	DTX2
				RN7SL377P	PPIL6	CHST14
				CCDC114	SSR4P1	TMEM5
				ZNF518A	AC027806.1	ABHD11
				RP4-758J24.5	WNT4	COL9A3
				RP11-395N3.2	AP000487.4	METAP1D
				PIK3IP1	APAF1	RP11-715J22.4
				LRP11	RP11-192H23.6	CNPY4
				RP5-921G16.2	PDXDC2P	RNF31
				C7orf71	APOLD1	INPP5E
				IRS4	ENO4	RP11-111M22.2
				RP11-560A15.3	AP000688.29	RP1-288H2.2
				RAD9A	TBR1	SLC35A5
				CCNB1	AC034102.1	CTD-2135J3.3
				MTHFD1P1	RP11-757G1.6	TAF12
				RIMKLBP2	LINC00205	DGCR2
				DHRSX-IT1	DIP2C	NPIPA7
				LPHN3	RP11-105C19.1	HYI-AS1
				ARL5C	RP1-29C18.10	CTD-3195I5.5
				SMCO1	PIPSL	ACBD4
				MON1B	CTD-3126B10.1	RP5-1157M23.2
				DBH-AS1	MTMR9LP	RP11-113K21.4
				CAMK2A	RP11-10A14.3	RP11-152N13.5
				ECE2	CAGE1	MAST3
				RP11-855A2.3	SBNO2	HNRNPDL
				RP11-445P19.3	CORO1B	RP11-572M11.4
				ACSF3	GJA9	AP000295.9
				ASIC1	FZD8	C6orf201
				NOL8	RIMS2	PKDCC
				C9orf131	RP11-932O9.7	CTD-2370N5.3
				FRAT2	RBMXL2	STK19
				RP4-622L5.7	TSPAN11	KCNJ12
				CTD-3099C6.11	FAM21B	RP11-244H3.4
				RP11-374M1.4	RP11-1365D11.1	HTR2C
				CARD9	FUT1	OASL
				BCL2L2-PABPN1	C1RL	GNRHR2
				LINC00412	RPS4XP16	MORF4L2-AS1
				TNNI1	RNF14	SEMA4B
				CLDN9	MIR186	LRRC8D
				RP11-696N14.1	AC108142.1	RP11-68L18.1
				GNPAT	HSPD1P10	KCND1
				MYBBP1A	STX18-AS1	TUT1
				LCN6	AVIL	ADAM19
				P2RX1	PPP2R5B	ZNF627
				FBXW8	TTLL3	ZNF823
				OPN1SW	ZFP92	PPCS
				CAMKK1	RP11-798G7.8	DPH5
				VPS9D1	EPHA1	GTPBP3
				RP11-154B12.3	AC040173.1	LRRC37A4P
				SLC30A6	KCNN1	RHBDD3
				MDM1	CHODL	SRGAP2
				P2RX4	CRYM	RP11-529H20.6
				WBSCR27	CDC20P1	NBPF12
				INF2	RP11-64K12.8	FCHO1
				LNX1-AS2	SCGB3A2	RP11-121C2.2
				SLC25A40	RNU6-722P	ZNF214
				SLFN12	RP3-399L15.3	RHOBTB2
				AC079630.4	MCF2	LRRN2
				CALCB	IGDCC3	LINC00654
				FAM45A	NBPF14	GRB10
				KEAP1	HSF2BP	NDUFV3
				RP11-101E7.2	AC019118.2	RP11-305P22.9
				MIR3682	TRAF1	XKRX
				ANTXR1	AC005519.4	CHST12
				PDE3B	AL022341.3	RP11-452L6.7
				CGGBP1	TBCE-AS1	RPUSD1
				C15orf40	PPP1R26P1	DAPP1
				RP11-332H14.2	RP11-17J14.2	R3HDM2
				RP11-166P13.4	FAM231D	RP11-24B19.3
				FPGT	SULF2	CAPN14
				HPS3	UTRN	BRI3BP
				RP11-504P24.8	CTB-118N6.3	INTS6
				TNNC2	USP32P1	NUTM2D
				MTND5P28	NBPF8	DLEC1
				PRKY	CICP3	ZNF383
				XX-2136C48.7	RP5-1142A6.2	NPIPA5
				RPL9P29	DUX4L9	SLC6A16
				TMEM91	GUSBP4	RP5-1092A3.4
				TBC1D8B	RP11-115N4.1	TMEM232
				DDR1	RP11-544D21.2	AC093616.4
				CTD-2135D7.2	ZSCAN31	TMEM161B-AS1
				EFNA2	RP11-61L19.2	TCAP
				TRGV1	RPL3P2	MIR4697
				TMEM63A	RP11-166O4.5	SLC25A17
				JRKL	CDC42BPG	RP11-303E16.2
				AC007566.10	SZT2	FBXO41
				HESX1	RP11-162O12.2	RN7SL488P
				IFI16	CTNND1	RDH10
				AP003025.2	RARA	E2F3
				RP11-110I1.13	AC002117.1	CRIPAK
				AC003102.1	MGP	PIK3R4
				H3F3C	CTD-2587H24.10	LINC00173
				XXYLT1	MIR3180-2	RP11-307C12.12
				XPO5	MIR3180-3	AC144652.1
				RP11-350G24.1	LINC00992	KCNJ11
				SNORD125	PTOV1-AS1	CTA-211A9.5
				DIEXF	CCNT2-AS1	HCG4P5
				HELZ2	AC099759.1	RMI2
				AC138783.11	CCDC3	MAPK7
				RP11-631N16.2	MSH5	NFE2L1
				THAP10	RP11-849F2.8	AP000351.10
				S1PR4	FBXO24	ADPRM
				F8	CEP72	RP11-488C13.5
				ZNF467	GMDS-AS1	C9orf85
				FAM120C	AC083843.2	GPATCH4
				SPDYE9P	RFXAP	RP5-1112D6.7
				RP11-148O21.6	MARVELD1	POLR3C
				TMC1	ARAP1-AS2	PATL2
				MYOZ3	RPS2P45	DESI1
				RP11-286N22.8	RP11-295P9.3	PAX8
				UBTD1	ZBTB40-IT1	PIP5K1C
				TTF1	INSC	RP4-545K15.5
				AC103564.9	CTD-2192J16.26	CCDC146
				ENDOU	ZNF43	CTD-2302E22.5
				ZKSCAN1	TNFRSF10B	REXO1
				WDR75	HM13-IT1	IFIT3
				HOMER2P1	PRDM5	KCTD12
				AL391357.1	CBLN3	NUDT16
				TNFRSF1B	ASB16	DNM1P51
				TNKS1BP1	FBLL1	RP11-66B24.4
				AC009237.8	PLEKHD1	OXSM
				RP11-178C3.2	AP001055.6	C3orf33
				PRKAR2A-AS1	AC093063.2	RP11-79P5.9
				DENND1C	RP11-65G9.1	RP11-16E12.2
				KIAA1009	NKD2	FGF2
				COA4	LINC00886	CTNS
				ZEB1-AS1	HMGCL	RPAP1
				HABP4	RP11-22P4.1	SDHAF1
				AC092338.5	RP11-894J14.5	MTX2
				FAM76A	SP6	CEACAM19
				HCK	OR1J1	ORAI1
				CD28	CLEC4M	ARCN1
				SSPN	CYP4A22	RP11-228B15.4
				CCDC151	RN7SL529P	RP1-71H24.1
				RP11-164H13.1	IQCH	AKR7L
				CCDC86	XRCC6BP1	RP11-64C12.3
				RP11-493E12.2	RP11-381E24.1	ZNF37BP
				RP11-513O17.2	GATA4	AC226119.5
				BFSP2-AS1	PUS10	ADORA2B
				RP11-384L8.1	RP11-1007O24.2	THBS2
				RP11-179G5.1	RP11-122G18.5	NPAS1
				MICAL2	XXbac-B444P24.13	TMEM240
				MTFP1	METRN	RP11-282O18.6
				SDCCAG3	ANO4	FAM203A
				CYB561D2	C6orf99	KCNA3
				SCARF1	PTPRC	FAM120AOS
				NTN1	RP11-336F14.1	CA15P1
				RP11-95O2.1	RP11-780O17.1	TMOD1
				RP11-566K11.5	AC055811.5	PTCD1
				FERMT1	LPAR2	ZNF346
				ZNHIT2	SFTPD	RP13-890H12.2
				RAB39B	SEMA3A	LINC00174
				RP11-762H8.1	OR7E126P	IPMK
				GALNT15	RP11-307O13.1	SKIDA1
				CEBPZ	MIR3179-1	C8orf44
				RP11-342K6.2	ZNF558	TRAPPC3
				CTA-714B7.4	TMTC2	TDP2
				PRDM4	ZNF474	DNAJC11
				MIR210HG	GRIK1	WNT5B
				SPDYE1	ARHGAP19	C11orf63
				TNRC18P3	TRGV4	MSRB1
				DTWD2	C3orf35	NPIPB15
				SP110	RP11-658F2.8	ZNF766
				FLVCR1-AS1	NANOGNBP3	RP11-666A8.8
				PGBD1	RP11-42O15.3	GPKOW
				SLC43A2	RGAG1	KANK2
				HSFX2	CLMP	COA7
				RP11-328N19.1	ZMIZ1	RN7SL181P
				GGT8P	MYO18B	GTSE1
				HMGB1P1	LINC00202-2	FAM219A
				TRAV8-5	CADPS	MSANTD4
				RAD50	KMT2D	RP11-38L15.3
				NLRP5	RP4-736L20.3	TRAPPC12-AS1
				RP11-63A1.1	AC010525.4	NIP7
				C15orf37	MFI2-AS1	S100A3
				GGA3	PKDREJ	SETX
				RP11-568J23.5	SULT1A4	GOLPH3
				VWCE	ZNF197-AS1	PLK3
				SDC4	RP11-135J2.4	WDR89
				RP3-326I13.1	CHKB-AS1	PRKAB1
				RP11-355O1.11	AP001347.6	ASF1B
				VMO1	CSRNP2	VPS72
				POFUT1	SCGB1B2P	KIF14
				RP5-1039K5.17	SPARCL1	SSTR2
				ZNFX1	OVOL2	SLAIN1
				TRGV5	RP11-295D4.1	ALKBH4
				AIM2	NMNAT1	COG2
				RP5-1021I20.1	CTA-221G9.11	RP11-51J9.6
				TRIM52	DNAH2	RP5-1024G6.5
				ARMC4	RP11-368J21.3	RBM47
				COG4	RP11-90K6.1	LINC00852
				ATP5J2-PTCD1	RAB40A	RP11-644F5.10
				ADCK2	C12orf77	TSPEAR-AS1
				RP11-686D22.8	LINC00568	SNAPC1
				PRPF4	ADORA1	CDPF1
				PSMB5	RBMS3-AS2	PLA2G12AP1
				USP2	PIPOX	CELSR2
				MFSD6	KLHL30	GS1-124K5.6
				WIPF3	PRRT3-AS1	SWSAP1
				RP5-940J5.3	TRPM1	NAT9
				SLC1A5	ACTA2-AS1	LL21NC02-1C16.1
				FTSJ3	RP11-983P16.4	RP11-260M2.1
				CTA-212D2.2	ZSCAN25	STEAP3
				TICRR	RP13-33H18.1	NDRG4
				CTA-390C10.9	LINC00634	TTF2
				RP11-368I23.3	FAM27E3	LA16c-321D4.2
				TRAV18	TNC	MCEE
				ZNF510	SLC5A3	E2F1
				RP11-356B19.11	RP11-201K10.3	ZNF174
				CTC-273B12.6	CYP1A1	RP11-271K21.11
				FMO3	AC091171.1	ZNF579
				FKSG63	RBMS1P1	RP11-134L10.1
				MIR635	FAM129B	AC005702.1
				DHX37	PPT2-EGFL8	ZNF76
				NFYAP1	LYG1	KNTC1
				RP11-452G18.2	RP5-937E21.8	RP11-464F9.22
				CAV1	RP11-432J22.2	RP1-20C7.6
				GP1BA	AP000266.7	DGAT2
				RP11-531F16.4	SLC22A13	TINF2
				NEURL4	CTD-2651B20.3	PITPNA-AS1
				EPDR1	RP11-178G16.5	TMEM102
				FAM170A	NUDT13	DDX50
				MYO1C	SEC14L6	FAM86MP
				RP11-626K17.3	AC090587.5	TRAPPC2P1
				KLHL12	ANKS3	KLHL6
				RP11-127B20.2	RP11-408A13.4	RP11-453E17.3
				SLC35E3	AC005523.3	BCL2L2
				PRR16	OLFML2B	GMPPB
				AL022341.1	RP11-767C1.2	XBP1
				KB-226F1.1	SOD1P3	TUBD1
				FGF7	ACTR3B	RRNAD1
				GLT8D1	CNR1	ZNF417
				CCDC174	FAM183B	ZNF74
				RP11-77H9.6	ABHD14A-ACY1	DCLRE1C
				TTLL13	AP000959.2	RP11-339B21.15
				FAM120B	IFIT5	RP11-50C13.1
				RP11-467I20.6	SLC31A2	RP11-440D17.3
				ZNF17	RP11-621L6.2	PPP3CB
				RP11-574F21.2	ABCA12	RP11-175P13.3
				AC017116.11	AP002884.3	SLC25A43
				NRIP2	AE000661.37	TRPC1
				AURKA	ELMOD1	AIM1
				AC093668.2	RPS10P3	C3orf62
				CETN3	RN7SL401P	SNX10
				RP11-485G4.2	WDR25	ELMOD2
				HAND2-AS1	ERVK13-1	PLEKHG2
				RPGRIP1	RP11-973H7.5	ACAD11
				RHD	RP11-92K15.3	PHLDB3
				TMEM120B	HIRA	CTD-2196E14.9
				TRMT13	MSANTD1	SPATA2L
				RNF144A	AL359753.1	RP11-566E18.3
				RP11-611O2.3	LINC00869	NSRP1
				RP11-70P17.1	PCSK6	ZNF799
				KRT18P5	ZC3H11B	CHST5
				ANXA2P2	DICER1-AS1	ZFP62
				ZNF689	FKBP1C	MDC1
				CYBB	SMG6	RP11-512H23.2
				RP11-861A13.4	STXBP3	PWWP2B
				TCEAL8	KIAA0391	UACA
				AC022182.1	RP11-266L9.5	AC005682.5
				CTD-2510F5.4	PCDHGA12	DYRK3
				Z97634.3	RP11-548H18.2	PI4KB
				MAP6D1	CMIP	ASH1L-AS1
				PRR19	AC026271.5	RP11-757F18.5
				ABHD1	ANKRD34A	CBL
				SRRD	RP11-1L12.3	RP11-266L9.4
				KDM2A	AC144449.1	C7orf25
				CTD-2517M14.5	COL9A1	RP11-392E22.5
				CLEC18C	ZNF385C	ZNF658
				PCP2	NEK11	ISYNA1
				HJURP	FAM221A	PLAGL2
				ZPBP2	LRRC3	GS1-279B7.2
				CCDC169	TMEM98	CMTR2
				TRGV5P	RAB43	TMCO6
				ENTPD5	AC105053.4	TEKT4P2
				CTC-297N7.8	CHM	RP11-1017G21.5
				PCNXL3	ZNF773	C19orf44
				RP11-551L14.7	OXCT1-AS1	ZNF681
				ASXL3	RP11-268J15.5	XPC
				SDAD1	GVINP1	CCDC42B
				GLIS2	RP11-170N16.3	RP11-158H5.7
				ADAMTSL2	DPF3	XXbac-B444P24.14
				RP11-525J21.1	TTL	LUCAT1
				CIB2	TIPARP-AS1	RP11-680F20.12
				PAK4	RP11-191G24.1	AC016629.8
				ACP2	FCGR2B	RPUSD2
				CTD-3035D6.2	RP5-1142J19.2	RP11-738E22.3
				EXOSC2	NMI	RP11-536C5.7
				CTD-3220F14.1	EIF3CL	ZMYM1
				RNU6ATAC24P	NT5C1A	NPAT
				RP4-800G7.2	ZNF678	MIEF1
				CITF22-92A6.1	LIMD1	C2ORF15
				DDX43	IQCG	GPAT2
				SNRPGP15	HOOK1	STK38
				SFXN3	AC012314.8	PARG
				CTC-378H22.1	RP11-196O16.1	CTA-481E9.4
				RP11-395I6.3	CTD-2540B15.11	ING4
				AP001626.1	CTSK	CASC7
				ZNF101	RP11-490O6.2	RP11-600F24.7
				HELB	AC104777.1	ELAC1
				SUV420H2	TBX15	RP11-529E10.7
				NOA1	PMFBP1	RP11-761I4.3
				ZBTB12	PSMC1P1	EBAG9
				YDJC	CASC1	UBL7-AS1
				MAPK8IP3	ZSCAN30	IRF2
				KIAA1586	TDRD12	RP11-495P10.5
				ZNF876P	HS1BP3	ZNF701
				RP11-61F12.1	CCDC30	MUS81
				IVD	ADAM21	ATP7A
				ZNF791	GLT8D2	IBTK
				AP003774.4	HHIPL2	SLFN5
				RP11-849H4.2	RP13-452N2.1	LRRIQ3
				AC004019.18	RP11-380P13.2	TIGD6
				MAMDC2	OXCT2P1	NAIF1
				RPL17P50	BRSK1	RP5-1103G7.4
				RRAGA	STEAP1B	C1orf106
				TUBB8P2	FBXL7	CTD-3074O7.12
				TBC1D29	PGBD5	MTL5
				ITGA2	BLM	MUL1
				DBT	DCTN1-AS1	C10orf2
				RP1-20N2.6	MAST4-AS1	SLC46A3
				UNC79	MIR3180-1	PSMD5-AS1
				SIX1	SLC45A1	RMND5B
				LSM6	RP5-857K21.4	ABHD4
				RP11-12A20.6	PIEZO2	NDST2
				RASL10B	ARRDC4	AC026740.1
				RN7SL75P	AC010894.3	PRKXP1
				RP11-1348G14.5	RP11-598D12.4	ZNF517
				RN7SL278P	RP11-626H12.2	RP11-413E6.1
				AP000275.65	RP1-111C20.4	AC074212.6
				SETD1A	ADAM8	TCHP
				MAGEB6	MINOS1-NBL1	HCG11
				WDR55	TOMM20L	XK
				C2orf54	DHDH	RP11-521C10.1
				TARDBPP2	U82695.10	IFT46
				RP13-131K19.1	ZNF785	GTPBP10
				FBXO4	AP000704.5	STRADA
				KCNJ9	DTNBP1	ASPM
				CCDC58	LPXN	CRK
				GNAS-AS1	SSTR3	ANKRD16
				SH2D3A	RP13-977J11.2	GEMIN8
				LRP4	CLEC3A	IPP
				RP11-10C24.3	LINC01060	RP11-388M20.9
				TIAF1	NBPF20	ZNF561
				RP11-163N6.2	AC110299.5	RGP1
				LAMTOR5-AS1	ZNF571	FAM122A
				AL031320.1	OSR1	MARVELD2
				AC108676.1	RP11-349N19.2	RNMTL1
				ACAD10	RP11-269F21.1	MVK
				KLHL5	RP11-23J9.4	CUL9
				SMAD9	RP11-803B1.8	SLC35B3
				CTD-3138B18.5	MEST	RP11-379H18.1
				WAPAL	RP11-305E17.6	TBC1D25
				SNAPC4	RDH12	ZNF202
				KIAA1430	CTD-2410N18.3	AP001652.1
				TP53I3	ADCK1	ANO5
				SNAP29	PHBP9	PRR14L
				SDHD	MPRIP-AS1	WASH5P
				CTD-2267D19.6	WI2-3658N16.1	AASDH
				RP11-229P13.20	RPL5P30	CHMP6
				CLSPN	RP11-210N13.1	AFAP1L2
				F2RL2	GRB7	COX10-AS1
				TRIM15	FAM85A	TSTD2
				ANKRD36BP2	RAB40C	VPS37C
				C11orf45	TRERF1	AC007382.1
				RP11-692D12.1	BIVM	C19orf48
				SAMD10	ZNF273	RP11-162G10.5
				RPL34-AS1	PLA2G6	POLR3D
				TRIM32	CKMT1B	CTD-2517O10.6
				LINC00403	RP11-95O2.5	RP11-110I1.14
				LOH12CR2	RAB5B	SETD6
				ANGEL2	NDUFB2-AS1	EIF3EP1
				IER3IP1	ZFP14	RASA4DP
				FAM92A1	RASA3	LRRC63
				RP11-197P3.4	SLC35F4	PIGA
				ARMC7	CTD-2026D20.2	SP4
				MGAM	CEBPA-AS1	TRAIP
				RP11-553A10.1	GTF2IRD1	CYP2U1
				DCAF7	RN7SL651P	GEMIN4
				CLUHP4	MALL	ZNRD1-AS1
				CECR6	FGFR4	MYLK2
				C15ORF37	BMP4	RP11-266K4.9
				ZNF559	EIF4EBP3	LINC00920
				CCDC94	CPNE5	GOLGA5
				AC127496.1	TRIM41	SNORA5C
				TTLL1	GCSHP3	ERI2
				AL137059.1	N6AMT2	TRGV3
				TMEM184B	SRGAP3	APOBEC3G
				RP11-97O12.6	CPNE9	RP11-463O9.9
				CELF5	DYRK1B	RWDD2B
				CEP170B	ZFPM1	BET1L
				RP11-30J20.1	RP11-131J3.1	C8orf37
				TTC4	RP11-483I13.2	E2F8
				TAF2	CTB-47B11.3	RP11-339B21.14
				RN7SL535P	RP11-274B21.8	CTD-2228K2.5
				ITFG3	FAM161A	ZNF485
				RP11-2E17.2	WNT2B	CELSR3
				RPUSD3	RP11-344N10.5	RP11-53O19.3
				AC004878.3	RP11-109D20.1	MTHFSD
				HDAC11	CTC-458I2.2	AC010761.13
				RP11-539I5.1	AP001631.10	CTD-2314B22.2
				C18orf54	SEC16B	CARF
				ACKR3	AC034110.1	RP11-51F16.9
				P2RY10	CAB39L	WNT8B
				DDX56	LRP8	TULP3
				SH3BGR	RP11-434D9.2	MAP10
				RIPK1	UPF3AP2	C7orf49
				SLC27A2	EMX1	CHAD
				AC025278.1	PTGR1	OPN3
				ZNF501	RP11-883G14.4	CPSF3
				HPS4	FAM27D1	RP11-395B7.7
				RP11-583F2.1	HLA-AS1	RP11-55K13.1
				TDRD9	RP11-440L14.4	PPCDC
				AC002310.7	AMPD1	CAND2
				PLSCR1	FAM159A	ZC3H12C
				CEACAM8	RP11-397A16.1	RP11-541N10.3
				AC009404.2	ARHGAP31	FAM57A
				RP11-21L23.2	TNKS2-AS1	RP11-4F5.2
				PCDHB6	PTK2B	PPP1R3B
				CXorf21	AK4P3	PSRC1
				CTC-498J12.3	DDX60	RP11-305L7.3
				DTX2P1	RP11-398E10.1	RP11-434D12.1
				RP4-665J23.4	SAMD7	MOB3C
				RP11-659G9.1	PLIN4	MDH1B
				CRMP1	MYO1H	HNF1A
				LINC00958	CTD-2382E5.1	ADORA2A
				RP11-649A18.12	FHL3	SMARCAL1
				HTRA2	RP3-347M6.1	WIBG
				CLUAP1	VSIG8	AC005104.3
				RP11-452K12.7	FGFRL1	NIT1
				TNFSF9	PTGER3	ZNF500
				MIR324	RP11-292F9.1	DSN1
				SNORD12	RP11-81H14.2	RP4-791M13.3
				RP11-458D21.5	RP11-617D20.2	ZNF700
				RP11-582J16.5	NXPE2	OMA1
				ZNF433	NME9	IRF1
				PLLP	DLG3	PCDHA11
				AP000487.5	CTD-2619J13.16	UCN
				ZNF776	RP3-366N23.4	C17orf75
				CTC-228N24.3	AP001432.14	RP11-876N24.5
				NSUN4	RP4-784A16.5	AARS2
				AGPAT4	MYO5BP1	GNAZ
				ACKR4	ATG2B	BPTF
				RPL39P36	RN7SL151P	SPAG5-AS1
				RP11-407N17.3	C14orf159	RP11-146D12.2
				PPP1R32	RBM38	NBPF9
				EXO5	RP11-968A15.8	TIGIT
				RP11-197N18.2	ZNF625-ZNF20	AC010327.2
				MST1L	TAS2R5	PROB1
				IRAK1BP1	FGF8	RP4-694A7.2
				RP1-197B17.3	PLAGL1	VWA9
				TBC1D13	RBMY2FP	SNAPIN
				KCTD11	RP11-473O4.4	ZNF687
				RP11-252A24.7	SNRPEP4	PRMT5-AS1
				RP11-713P17.3	RP11-701H24.3	RP11-111F5.2
				TRDMT1	RP11-13N13.6	SYCE2
				RP11-686D22.7	RP11-35G9.3	RP11-1334A24.6
				MYO19	PPT2	LINC01007
				RP11-2I17.1	RP11-75L1.1	SNAPC5
				ADAMTS14	IGLV2-8	C17orf97
				AC021188.4	RP11-114F3.5	FABP3
				MROH2A	CTD-3025N20.3	FAR2P1
				RP11-530N7.2	RP5-1073O3.7	IRAK4
				METTL6	PILRB	ZSCAN12P1
				FAM187A	NBR1	SPIB
				RP11-11N7.4	RP5-1052I5.2	ZNF575
				MSMB	RP11-549B18.1	POLG2
				ZNF648	FNBP1P1	ZBTB22
				PLEKHN1	RP11-463O9.1	ZSCAN32
				NRP2	AC091729.9	ASPHD2
				CTD-2527I21.14	TRIM17	XXbac-B476C20.9
				MAMSTR	MGLL	MIR1254-1
				C8orf58	RP11-108K14.4	FAM83A
				RP4-614C15.2	RP11-433J8.1	RP11-110G21.1
				DPF2	XXbac-B135H6.18	VSIG10
				SLC16A1-AS1	C6orf3	SETD1B
				ADIRF-AS1	PRDM8	PDCD1LG2
				SCNN1G	RP1-150O5.3	RP11-726G1.1
				RP11-802E16.3	BTG2	AC010536.1
				ARHGEF38	STAT5B	ZBTB42
				C21orf49	CACNA1C-AS2	RELB
				RP11-394I13.2	RARB	DEPTOR
				AC079767.4	MADCAM1	EPM2AIP1
				ACAP2-IT1	ARHGAP35	TMEM42
				NUDT12	AC006000.5	ZNF784
				SLC5A2	PRIMPOL	PRKACB
				RP11-353N4.2	HMGA2	DYNLL1-AS1
				UBIAD1	AC005394.1	PRKD2
				RN7SL157P	CBLN2	DDX28
				SDK1	ADC	NFATC2
				SLC25A28	GPR35	RP11-464F9.20
				TRIM31	C11orf94	AC011290.5
				SLC30A9	KIF19	GPN2
				C1orf162	HPDL	NFE2L2
				SLC45A3	SLC6A15	RNF135
				GPR161	TERT	LINC00528
				RP11-10J5.1	EFCAB10	ORAI3
				RASA4	CYB5D2	CTD-2083E4.7
				LYPLAL1	ARHGAP1	TRMU
				TLR4	GOLGA6A	LCT
				PATZ1	RP11-705O1.8	PREB
				AC011551.3	RP5-1091N2.9	RPP25L
				RP11-472B18.1	AC008072.1	CALB1
				RP11-554A11.9	NFE2L3P1	RP11-7F18.2
				ZSWIM5	CTNNA3	PHF7
				RP5-991G20.1	TCF19	LINC00847
				HSD17B1	AC010132.11	DDTL
				SLC35C2	RNU6-7	LZTS2
				H2BFM	RNU6-8	NUBP1
				BAG2	NOVA1	CTA-126B4.7
				AP001057.1	C1orf192	KB-431C1.4
				YTHDF2	AC026202.3	RP11-815I9.4
				ZNF596	RP13-317D12.3	SNRNP40
				HSPG2	RP11-862G15.1	USP32P3
				CTA-331P3.1	RP11-396F22.1	PLEKHO1
				ZNF252P-AS1	CA5A	AC093323.3
				RP11-574K11.28	AC008948.1	TDG
				RRP7A	MIR4482-1	WBP4
				ARL4C	LINC00623	CCNF
				RP11-977G19.12	MAML2	LMBRD2
				CBR1	SLC30A10	OGDH
				SPDYE3	RP11-677O4.6	RP11-16E18.3
				SULT1A1	TPM3P6	C19orf54
				ZNF347	AC012615.1	DFFB
				APOM	MACC1	AP5B1
				F10-AS1	SAMD14	SUOX
				ZNF69	GLUD1P2	ZHX2
				RP11-6J24.6	AC020910.1	RNF41
				TTC1	RP11-484D2.2	ZNF441
				RP11-359G22.2	AC012442.5	MYNN
				MYO15B	SDC1	ZNF862
				CRB2	RP11-173M1.5	ALG12
				LRRC34	RP11-542K23.9	ZSCAN22
				ST8SIA1	UEVLD	RP11-521I2.3
				LENEP	CTC-523E23.4	OSTCP1
				SP1	RP11-401P9.6	AC099850.1
				MPP2	HS3ST3A1	FUT4
				HERC2P9	CTD-2017C7.2	INHBE
				BSND	ZNF66	NABP1
				ZNF345	C19orf47	RP11-196G11.4
				RP11-944L7.4	RP11-464D20.6	THAP8
				MCAT	RP11-290C10.1	HS6ST1
				C9orf40	PPM1E	AC002398.13
				GPM6B	IGSF22	DUSP18
				EPHA10	IL18R1	AC084219.3
				RP11-379C10.4	ADAP1	RAB12
				PIGB	AC007285.7	JOSD1
				CTD-2287O16.5	MIR3911	MLH3
				TMEM216	AKR1C7P	MFAP1
				C1orf56	HLA-DOB	E2F2
				LENG9	AC007036.6	LRRC27
				PYGM	ZNF771	RP11-490K7.4
				TEAD2	RP1-97D16.1	EVC
				RP13-270P17.2	AVPR2	GLUD1P3
				NFYC-AS1	C2orf68	CTD-2036P10.3
				TTC32	PON1	C22orf29
				RP11-223A3.1	OR8S1	RP11-473M20.14
				RP11-758P17.3	OSBPL5	ZNF337
				CPSF7	CTD-2525I3.6	DNTTIP1
				FADS1	RP11-734I18.1	RP5-1074L1.4
				MLLT10P1	ALPK1	OR2W3
				CTD-2116N17.1	MAGEC2	EVI2A
				PVRL2	CADM4	TDRD7
				ANKRD20A8P	RFX7	BTN2A1
				WASH6P	FN3K	ATP8B2
				AC009299.4	IDS	GRK4
				VANGL1	ADAMTSL5	AC010525.7
				TP53TG3D	AC007392.3	CTC-462L7.1
				BIN3	CDC42SE1	ZCCHC24
				AL773604.8	SLC36A2	TTPAL
				RP11-145E5.5	CTD-3232M19.2	RP11-666A1.3
				ZNF573	FRS3	RP11-1070N10.4
				ARHGAP39	SHF	RP11-435O5.5
				PAN2	OR2AG2	CPXM2
				AC012494.1	MIMT1	RP11-167N5.5
				NTNG2	RGS5	AGAP6
				MIR4453	GNAT2	ZNF252P
				MIR191	AC002116.8	PTPRE
				AC068282.3	ADAMTSL1	MIR4292
				RP11-773H22.4	ZNF586	BTN3A1
				COQ9	RP11-597D13.9	FAM86C1
				TTLL10-AS1	RP4-533D7.5	MAPRE3
				RP11-513M16.7	SKIL	EPM2A
				ALDOB	AC026992.1	RP11-876N24.4
				GTF2H2C	VEPH1	C11orf54
				FCRL3	PGPEP1	AL357673.1
				RP4-665J23.1	LL0XNC01-237H1.2	AP001062.7
				CTA-989H11.1	THTPA	TLCD1
				RP11-711C17.2	SLC35E2	GOLGA2
				BEAN1	RP11-536K7.3	INTS3
				SLC2A6	AC005498.3	ANKRD40
				RASA2	KLHDC8B	RP5-874C20.3
				KIAA1731	COL16A1	C19orf68
				ERVMER34-1	RP11-981P6.1	C5orf34
				CD86	RP11-252A24.3	AC004076.9
				ZDHHC6	EML2	RBFADN
				CTD-2554C21.1	PRKAG1	TMEM177
				RP11-301L8.2	AC002116.7	DHX34
				BHLHE40-AS1	LINC00957	ZNF85
				AC009237.11	LINC00648	SLC6A9
				CTD-2206N4.4	AC104024.2	RARG
				FRY	CD27-AS1	SNX21
				KRI1	SLC37A1	HAUS6
				RP11-159F24.5	ANKRD49	TYSND1
				SPIN2A	BRINP3	LRRC14B
				ZNF793	AL354718.1	KDM4D
				ST5	RP11-761E20.1	FAM115C
				CENPI	ZNF582	ZNF436
				RP11-114I8.4	GOLGA8N	CENPQ
				ZFP42	RP11-1042B17.5	CTD-2192J16.20
				SLC27A4	PAK7	SNORA11
				CTD-2245F17.3	CTD-2231E14.8	MED29
				CTD-2140G10.2	RPSAP53	RP11-435O5.2
				SHOX2	CYP2D6	WDR31
				RP11-350N15.5	SNORD67	RP11-93K22.13
				FGFR3	CYHR1	VN1R81P
				DCLRE1A	RP11-144N1.1	RP11-398C13.6
				SLAMF7	SPATA6L	ALG1L13P
				TRIM4	ALPK2	HYI
				RP11-69E11.8	ZBTB5	RP11-799B12.4
				RP11-378J18.3	TRADD	PAX6
				PRORSD1P	RP11-177B4.1	TRIM46
				AF129075.5	AC091167.3	BLOC1S3
				SLC8B1	RBAK	AGGF1P1
				ZNF281	CTGLF11P	TRAFD1
				CCDC153	AC006449.1	DHRS7B
				RP11-397E7.4	ALDH8A1	GOLGA8J
				SAA2	KIAA0825	SMARCAD1
				AC012414.1	AC002480.3	XXbac-BPG299F13.14
				AL354806.1	SLC2A10	CSF1
				RP11-32K4.1	CXorf38	FAM86EP
				AC011385.1	ARMC1	RAD51D
				CORO2A	AL161915.1	TEN1-CDK3
				POGK	AC005616.1	C14orf80
				VPREB3	RPL36AP40	TOE1
				C5AR2	RP11-247A12.2	HYLS1
				C1orf101	NOXRED1	CKMT2-AS1
				GPATCH11	GPR143	SEC14L2
				FAM87B	2010-09-01	RP11-582J16.4
				CDC25C	RP11-297P16.3	ZFP69
				MIS12	AC139099.3	BFAR
				RASA4CP	SNPH	KCNJ10
				BLOC1S5	LINC00854	AC008746.12
				MAP3K6	TTC21B-AS1	HEPHL1
				RP3-402G11.27	ASF1A	RP11-435O5.7
				HNRNPLP1	RP5-827C21.6	ZNF696
				RP11-91J19.4	ZNF669	RP11-302B13.5
				TRAV22	SLC44A5	RP11-108L7.15
				ZNF829	ZNF891	ZNF790
				CTD-2008L17.1	DHX40P1	ABHD15
				NT5M	RP11-498C9.12	FLG2
				AC083899.3	MAPK4	TNFAIP1
				AC018766.4	ZNF585A	ZNF830
				SLC1A4	ZNF229	RP11-480D4.6
				MIR1302-9	ZNF143	UBA6-AS1
				CD68	CTC-428H11.2	CDK3
				CTB-113I20.2	TEX2	PIGCP1
				ESCO2	AC007038.7	RP1-79C4.1
				RP11-440G5.2	EHD4	IPO13
				RP11-166B2.8	FLNB-AS1	TFEB
				SRCRB4D	CEP164	PDIK1L
				MIOX	CHST2	C1orf220
				TPGS1	ZKSCAN7	DUS4L
				NKD1	KIAA1549L	RHNO1
				CTD-2292M16.8	KRT18P59	RP11-619A14.3
				MRPS18A	CREB1	GJC3
				LOXL4	LRRC29	CTD-2528L19.6
				ANO7P1	ZNF285	ENPP7P8
				RPL32P1	AC004447.2	IFFO1
				LINC00910	RP11-118M9.3	CHTF8
				RP11-395I14.2	CTD-2058B24.2	NDOR1
				RP11-618G20.1	GRM5	SYT12
				TRIM68	LAMP3	RNF185-AS1
				NKAP	POU6F1	CDK12
				LINC00521	FRMPD2	ZNF737
				BX936347.1	RP11-1186N24.5	RP11-316M20.1
				FBXO17	RP11-134G8.7	PPAPDC2
				RP11-350G8.5	HMGA1P1	EXOSC3
				C17orf72	TRPM6	RP5-1071N3.1
				THG1L	MYO1E	C19orf40
				RP11-347C18.5	PEX16	AGAP5
				PHLDA1	RPSAP15	RP11-778D9.13
				NAALAD2	VN1R42P	MKS1
				RIMBP3C	ADAMTS6	NBPF11
				JMJD6	MORC2-AS1	MGAT2
				RN7SL133P	CTB-184G21.3	RP13-104F24.1
				RP11-182J1.14	ATP11A-AS1	KCNK5
				KIAA1462	ZNF783	TMEM253
				RP11-443N24.3	AC074389.9	CTB-25B13.12
				KLHL31	RP11-465B22.3	DNAJC14
				SLC6A5	GALNT6	CTC-332L22.1
				FEZ1	PLEKHG3	RP11-95D17.1
				PAPPA	SNORA71C	RP11-206L10.2
				OBFC1	POLR2J4	AC005306.3
				AC025280.1	MGAT5B	NLRX1
				RP11-222A11.1	AC008067.2	TACO1
				KB-431C1.5	RN7SL70P	TSEN2
				CTD-2256P15.2	C1orf54	UTP14C
				MICU3	HCG23	CBX7
				RP11-348N5.7	LINC00574	2009-03-01
				LINC00087	INTS9	ZBTB11-AS1
				CTC-458G6.4	RP11-264M12.2	TBC1D3F
				DDO	CERK	CCDC102A
				DYX1C1	ARHGEF10	RP11-46C24.7
				RP4-816N1.6	MORN1	ZNF34
				RP11-66N24.4	AL022476.2	OR2T8
				PAPLN	RP11-6N17.3	LIPE
				PYROXD2	GPR45	THUMPD3
				CTA-14H9.5	RGS7	CPSF2
				ARHGEF18	MEGF8	GLYATL1
				RP5-1180C10.2	RAB38	STOML1
				C6orf57	JAZF1	RMI1
				RP11-48B3.4	RP11-19P22.5	BHLHA15
				RP11-109P14.10	RP6-109B7.5	AC079922.3
				RP11-552F3.12	SPTBN4	DTWD1
				RP11-379B8.1	RP11-146F11.5	XYLT2
				RP11-638F5.1	USP54	RRP7B
				RP1-317E23.3	CTD-2313N18.5	CASP1P2
				HP	RP11-352B15.2	KIR3DX1
				CTB-13F3.1	LRRD1	RP11-274B21.10
				AC159540.14	RP11-333E1.1	RNF34
				DHRS3	LIX1	ZNF444
				FAM72B	KCNK13	RP5-1136G13.2
				GS1-600G8.5	SIGLEC16	CAD
				B3GNT5	RANGAP1	RP11-192H23.8
				COX5BP6	RP11-496H1.1	NTAN1P2
				MIR5010	TTI1	CCDC96
				HIST1H2APS3	RP11-95P2.1	ZBTB24
				ZDHHC14	NEIL2	RNU6-850P
				RDM1	TTC23	RBM23
				SCARNA22	PRPS1P2	AC092301.3
				KANK1	NDUFB8	TYW5
				KLF11	ARHGEF1	CMAHP
				PTPN9	PHF23	BBS10
				RP1-223E5.4	RP11-502I4.3	ATG4C
				ZNF845	NCK2	CSTF2T
				FNDC3A	MIR3615	AC023157.1
				TRMT10A	KIF16B	TRMT5
				PIGV	CMAS	CCDC121
				PRR22	RP3-508I15.9	DENND4B
				RP11-755B10.4	RP11-1000B6.5	AP001258.4
				ZNF35	RP11-1379J22.2	TMC3
				F2RL3	IGKV1D-12	RP11-262H14.7
				SOWAHD	RP1-202O8.2	KDM8
				TBC1D27	RP11-343C2.12	CSF2RB
				CAAP1	AC068831.6	RP11-529K1.2
				RN7SL84P	PLAC1	RP11-94L15.2
				CTAGE7P	PTPN1	MC1R
				RP11-255A11.2	CTD-2517M22.14	MFSD2A
				RP11-154J22.1	FAM21C	SOWAHB
				EARS2	RP11-392E22.10	DCP1B
				RP11-667M19.9	ZSCAN9	IRF2BP1
				ELMO3	RP11-168O16.1	TOR4A
				RP11-247L20.4	AP001055.1	CHAC2
				RP11-504P24.6	AC007461.1	RP11-571M6.8
				RP3-465N24.5	RP11-136K7.2	GLTSCR1L
				USP6	OVAAL	SCAND2P
				SNAP25	RP11-91I20.1	ZNF133
				TUBA3D	TTC9B	TIGD7
				RP11-320L11.2	PGRMC2	RP11-613M10.6
				RP11-324H6.5	RP11-875O11.2	TMEM60
				HCN2	MRPL36	FAM167A
				KLHL36	RP11-594N15.3	RP11-363E6.4
				LINC00458	SIPA1	RP11-478C19.2
				ZNF620	ZNF226	ISG20L2
				GRIN2C	FAM134A	UBE2T
				RTP3	LBX2-AS1	ZNF175
				RP11-267C16.1	PPP1R1B	LINC00883
				ERCC3	AC005517.3	PAXIP1-AS2
				ACTN1	KIAA1841	C9orf117
				RP4-612B15.3	NR6A1	NPIPP1
				MAP3K12	RP11-394A14.4	FAM175B
				RP11-108P20.1	CTD-2152M20.2	RP11-1094M14.7
				RP11-346I3.4	SHC4	PSKH1
				BTN3A2	IMPG1	ZBTB48
				SSX2	RP11-91P24.6	PHF5A
				ST6GALNAC6	ZNF396	SP2
				MEF2C-AS1	SYCE1L	C2orf74
				CLK2	LIN28A	RP11-384K6.6
				TBXA2R	SLC2A3P4	AGAP4
				MTERF	ERICH1	LRRC37A17P
				TCF7L1	CTC-499J9.1	FAM220A
				RP11-690G19.3	LILRB3	SPRYD4
				CYB5D1	FAM217B	PTPRQ
				UTP14A	RP11-730A19.5	MED22
				RP11-294O2.2	MTUS2-AS1	OIP5
				RP11-16K12.1	C22orf26	POLL
				RP4-635E18.8	FAM149A	GS1-251I9.4
				CCDC120	RP11-135A1.2	MYOT
				RP11-77A13.1	HCG4P3	THAP7
				PUS7L	PLEKHG1	FIZ1
				ZXDA	CES3	RYR3
				RP11-480D4.2	SNORA9	NUP37
				ZNF440	TCTN2	CTC-459F4.6
				ZNF563	RP1-28O10.1	HMG20A
				RP3-486I3.7	RP3-333A15.1	FBXO43
				RP11-362K14.6	MN1	C12orf60
				EXOSC4	AP006621.5	MTERFD3
				CDC6	RP4-669L17.8	POLA2
				RNF165	LPCAT1	FKRP
				MPHOSPH6	GPALPP1	TRIM65
				CTD-2358C21.4	GABRG1	DNAJB5
				RP11-434H6.7	ZWILCH	BCL2L13
				IL24	AP000318.2	SLC26A2
				MIR647	TRNP1	CES2
				MYLK-AS1	GALT	IQCC
				CYP4V2	AC018755.1	RP4-682C21.2
				RP11-573D15.1	SMAD1	RASSF5
				GPR19	HRNR	CTD-3195I5.1
				HSPA1A	OAS2	RP11-467D18.2
				EPPK1	RP11-29H23.7	RP11-324O2.3
				ZNF767	TLDC1	ZNF672
				RP11-1319K7.1	GRWD1	SAPCD1-AS1
				ASLP1	MTFR1L	TMEM44-AS1
				RNU6-840P	TMEM168	PRMT6
				RP11-352G18.2	CTA-963H5.5	ZBTB14
				TREX1	C1orf116	RP11-540B6.6
				DIRAS1	SRC	RP11-10C24.1
				RAB15	AP000459.7	AC005062.2
				RP11-196G18.24	GPR63	SLX1A-SULT1A3
				ANAPC1P1	C17orf67	GGPS1
				TAGLN	RP11-80G7.1	AC004471.10
				CTD-3162L10.1	hsa-mir-8072	STK40
				ZNF781	RP4-798A10.2	LRRC20
				RN7SL487P	PCDHGA6	L1CAM
				UNC13D	RP11-98F14.11	TIMM9
				MTSS1	UNC5B	RP11-216P16.2
				CXCR1	RP11-54O7.3	MYCL
				AC009133.12	RP11-92G19.2	MMAA
				SNORA13	ST3GAL2	PRR15
				UNC13A	B4GALT7	SNORD46
				AC027601.1	RP11-275I4.2	GLIS3
				MSTO1		BLNK
				ITGA5		Z83851.3
				TNFRSF1A		ZNF438
				FAM222B		APEX2
				CTD-2006C1.6		SPNS2
				7SK		WDR88
				SLC9A8		PLEKHA8P1
				RPL18AP7		ZNF205
				SOX6		ZNF594
				GRIN3B		APC2
				CTC-203F4.2		AC010761.9
				GCNT3		PLGLA
				DALRD3		RDH14
				RP11-141B14.1		TRMT1L
				FOXD4L5		C17orf53
				RNASEL		RP11-318E3.9
				RBM22P3		IL22RA1
				NBPF13P		TSSK4
				OLFML2A		RP11-817O13.8
				ANKRD18A		MAP3K10
				RP11-147L13.8		PTPDC1
				RP11-530A18.1		ISCA2
				CXCL10		STARD6
				CTD-2314G24.2		DEXI
				BORA		GLTPD1
				ELAVL2		ARL10
				CTC-228N24.1		TRAPPC12
				RP11-670E13.2		RP11-527J8.1
				CCDC11		RN7SL657P
				PRKG1		TREX2
				LA16c-325D7.2		RP11-783K16.14
				AL358813.1		MYRFL
				ZNF815P		PROZ
				PALD1		NCEH1
				RP1-313L4.3		RAB7L1
				RNF215		LCMT2
				MANEAL		ZNF302
				SLC18A2		CTC-429P9.5
				KBTBD3		AC012456.4
				PTPN22		CBY1
				ABL1		RP11-757F18.3
				NAPEPLD		ZNF16
				FAM222A-AS1		GFI1
				RP11-231C14.3		DNAJC16
				ABCC6		DCLRE1B
				ZNF398		PARP9
				PEX10		FEM1A
				P2RY11		LNP1
				TNFSF10		CTD-2319I12.4
				ACSM4		METTL2B
				RNF26		RP11-444E17.6
				AD000092.3		RINL
				CXCR3		ZNF816-ZNF321P
				SERHL2		CPSF1P1
				RP11-422P24.10		NME6
				IKBIP		C10orf88
				CFH		LYSMD3
				ZNF550		PLCD4
				AL441883.1		CDH12P3
				PKIA		CDH12P1
				PTPRR		TTC9C
				TMEM136		PELI3
				FAM111B		CTB-171A8.1
				DNAH3		METTL18
				AP006621.8		RP1-92O14.6
				FHAD1		RP11-672L10.6
				RP4-583P15.11		IP6K1
				ZNF354A		MAML3
				ZFP90		TLDC2
				ETNK2		AC098820.4
				FAM155B		PRCD
				PRKCQ-AS1		TTC22
				RP1-249H1.4		GPR180
				MID1IP1-AS1		NSUN6
				ADAM1B		SH2D2A
				PLD2		TRIM69
				HYAL3		SGOL1
				CKAP2L		NPAS3
				RP11-126L15.4		CYP2R1
				DUSP3		HOMEZ
				RNFT1		CC2D1B
				MBP		NFKB2
				RP11-378J18.8		ZNF624
				RP11-727A23.5		SPRN
				AC139887.4		CDC42EP2
				RP11-793H13.11		EMG1
				SNAI3-AS1		WNT10B
				RBM48		ANKRA2
				RILPL2		CHCHD4
				RP11-212P7.2		BTN3A3
				GRIK5		TBL2
				RP11-120K9.2		TRIM11
				RP11-526I2.1		ABCA10
				TMEM170B		DOK1
				RP11-1020A11.2		TVP23A
				NDUFA3P1		RP11-73M18.9
				RP4-758J18.13		ZNF513
				SCG3		BSN-AS2
				AC005537.2		HAS3
				KLHL4		LOXL3
				GRAMD1B		TMEM255A
				C14orf37		KIF18B
				CTD-2337I7.1		BTBD8
				CTC-510F12.6		CLCN3
				CDKL1		C2orf27A
				RP5-1104E15.6		SLC25A1P5
				CCDC176		RP5-886K2.3
				THAP9		RP11-84C13.1
				RFWD3		TINCR
				TTI2		DYNLT1
				RP11-760D2.11		WWTR1
				C1orf172		HMMR
				RAB30-AS1		LMTK3
				CAMK4		FRMD4A
				RP11-563N4.1		AC005594.3
				CTB-133G6.1		RP3-508I15.19
				PFKFB4		ZNF619
				IL7		ANKRD61
				RUSC2		CTD-2021A8.2
				ZIK1		ZNF445
				CNIH2		IL10RB
				RP11-575L7.2		DUSP8P5
				RP11-50E11.3		NUP62
				ZNF233		MORC2
				RP11-488L18.3		RP11-235E17.6
				AC104809.4		WAC-AS1
				PRICKLE1		MED7
				RP11-454P21.1		ARV1
				IL17RC		ZNF554
				MANEA-AS1		CHN2
				RP11-158M2.3		FBXL19
				RP11-1105G2.3		BRCA1
				HLA-DQB1-AS1		ZKSCAN4
				CTB-5E10.3		ZNF772
				AC007277.3		ZNF142
				WNK3		ZNF623
				CEACAM1		GS1-114I9.1
				TREML4		TBC1D2
				ZNF280D		TIRAP
				GS1-358P8.4		RP11-215G15.5
				CCDC122		N6AMT1
				FAM20A		CLUHP3
				RP11-320N7.1		PLEKHF1
				LFNG		DTX3L
				RP11-305F18.1		LRRC69
				IGFALS		SUSD3
				IBA57-AS1		KIAA0040
				WNT6		SPHK2
				LINC00029		DBF4B
				PTCD2		TMEM203
				SWI5		NIFK-AS1
				XAF1		C21orf91
				TEX26-AS1		KIAA0513
				RP11-315D16.2		ZNF597
				RP11-286H14.6		THEM6
				DNAJA4		RP3-324O17.4
				SPOCK1		RP4-758J18.2
				FAM21FP		RP11-336K24.12
				RP11-667K14.3		SAYSD1
				RP11-710F7.3		RP11-119F7.5
				ZNF578		BOLA1
				MEX3A		RP11-689B22.2
				WASH4P		RP11-452C8.1
				RP11-338I21.1		PPP1R13L
				SMKR1		TBC1D10A
				LL22NC03-63E9.3		RP13-228J13.5
				CTD-2207O23.3		CTD-2366F13.1
				RSPH3		NBPF16
				CACNA2D4		WDR73
				POF1B		SH3PXD2B
				HHIPL1		CTC-325J23.2
				DMKN		DNM1P46
				SGMS2		GHRL
				ZCCHC6		JAGN1
				RP6-24A23.7		SLC10A5
				RBM43		TMEM69
				C1orf216		RP11-361F15.2
				AC008746.5		RP11-383C5.4
				CTD-3074O7.5		RP11-309L24.4
				LAMA3		ZNF443
				HNRNPA1P70		PPAN
				RP11-563E2.2		RP1-234P15.4
				TRIM74		NKIRAS2
				GPR114		FAHD1
				BAI2		SLC38A7
				TMSB15B		ZNF284
				TCP11L2		LINC00667
				MYL5		AVL9
				IMPG2		TMEM223
				CTD-2369P2.8		LACC1
				PILRA		C9orf69
				OR2T32P		RP11-309M7.1
				AC005606.14		RP11-313F23.5
				LST1		C1QL3
				RP4-646N3.1		SUV39H1
				RP11-37C7.3		ZNF45
				RP11-822E23.8		ACSBG2
				C20orf197		ZC3HC1
				RP3-420J14.1		NCDN
				RP11-277L2.3		LINC01136
				SPATA7		RP11-54F2.1
				INTS4L1		FIGF
				AVPR1A		RP11-134N1.2
				RP11-307C12.11		ZNF30
				TIMM21		BX322557.10
				SLFNL1		ESRRA
				RP6-99M1.2		SGK494
				TSSK3		LRIF1
				C10orf95		ZNF132
				NPHP3-AS1		TOR1A
				SSX6		FAM63A
				AC022431.1		ZNF576
				SLC9A5		FAM69A
				IGHV4-59		RP11-7O11.3
				CXorf24		EME1
				RP11-165J3.6		ZNF572
				MYLK4		CCDC39
				RP11-460N20.5		GTF2E1
				ALG11		RP11-10A14.5
				RBAK-RBAKDN		NFX1
				AMIGO3		ZNF48
				ATP10A		EDEM3
				XIST		UTP3
				RP11-529E10.6		ASB13
				RP11-309M23.1		RP11-690D19.3
				EIF2S2P4		ZNF397
				LYL1		GPATCH1
				MEGF11		HOMER1
				RP11-214N9.1		CTA-984G1.5
				TMEM115		OTUB2
				MYRF		C17orf80
				CTD-2515A14.1		POLM
				ZNF253		NUMBL
				ZNF844		HNRNPCP7
				CNTD1		RP11-76C10.5
				SLC4A1		INTS5
				PIH1D2		FAM86A
				RP11-762I7.5		CPT2
				RP11-404F10.2		TMEM192
				GIMAP6		LRFN3
				ZNF613		CENPB
				RP11-171I2.4		CTD-2037K23.2
				SCAND3		RP11-85F14.5
				CCDC18		RP11-285F7.2
				SPEF2		ZNF426
				SYT13		MLX
				SMARCD3		ZSCAN29
				MTIF2		ZNF486
				LYRM2		DNAJA3
				BEND2		PMM2
				RNF25		PGM5
				CTC-480C2.1		FANCF
				PITRM1-AS1		GEMIN6
				ZNF32-AS2		TPI1P2
				RP4-657E11.10		RP11-685M7.3
				AMER2-AS1		MOB3A
				GCNT1		CSTF1
				KLB		PIGM
				AP001065.2		TRPV1
				RN7SL834P		SH2B2
				EVPL		ESPL1
				CCDC103		IL20RB
				NLRC3		TMEM86B
				HSFX1		C7orf31
				ZNF723		RP11-259N19.1
				RP4-798P15.3		AC004466.1
				CTA-204B4.2		DHX32
				CTD-2010I16.1		DNAAF2
				ABI3BP		AL365331.2
				SLC35B4		FAM86B3P
				SNAI3		ZNF446
				NRCAM		ZNF839
				RP11-296E7.1		FLI1
				ZNF549		KBTBD11
				RFFL		RP11-84A14.4
				ZNF879		RP11-212P7.3
				RP11-78H24.1		ANKRD26
				Z95704.2		DNAJC30
				FBXO2		AP006621.6
				CHRNA6		MCM3AP-AS1
				PDE7B		RP11-1094M14.11
				MEI4		PRIM1
				TTLL10		PAX5
				CTC-487M23.5		MIEF2
				RP11-490H24.5		TEX19
				DDX11-AS1		LETM2
				TMEM178A		TP53
				CTD-2265O21.7		L3HYPDH
				RP11-159F24.3		ZNF792
				RP4-806M20.3		DEPDC4
				AC108463.2		LINC00909
				RP11-309L24.9		TUBB1
				PRR26		ZNF274
				ITPKA		LACTB2
				TSSK5P1		KB-226F1.2
				RP11-133N21.7		RP11-677M14.5
				PRRT3		MGME1
				CSRNP3		HDHD3
				DIRC2		ZNF514
				LINGO3		GUCY1B3
				RP11-488I20.9		KLHL26
				RBM12B-AS1		USP20
				LINC01106		TAB1
				RP11-2N1.1		RP11-644F5.11
				MOGAT2		CUTC
				PLGLB1		NOP14-AS1
				RP11-24B19.4		RP11-16E12.1
				RP11-585P4.5		LDLRAP1
				DIXDC1		TMEM140
				CACNA1E		RP11-363E7.4
				VPS18		MTHFR
				RP5-894A10.2		DUSP16
				SBK1		ZNF414
				RP11-746P2.3		ZKSCAN5
				ANKAR		CTBP1-AS2
				MIP		LENG1
				FAM184A		HSPA1L
				VN1R82P		GINS1
				RIN1		EPB42
				MYBPH		FAM115A
				ZC3H6		HEMGN
				CD27		ILDR1
				RP11-571L19.8		TRMT12
				TRIM13		CREBL2
				GPX2		RWDD2A
				CTC-429P9.1		OSGIN1
				CTD-2162K18.4		ZNF608
				CTD-2521M24.6		COG8
				RP11-429J17.2		THAP5
				IGLON5		RP11-517B11.7
				MEIS1		STOX1
				RP11-815M8.1		TJAP1
				LIPT1		GOLPH3L
				LINC00265		RP11-43F13.3
				SNX20		C6orf47
				ZSCAN18		CBWD7
				PPFIA4		RGMB-AS1
				AC009473.1		ITGB1BP2
				RP3-337H4.9		CYP27B1
				RP11-140I16.3		TULP2
				WDR7-OT1		ZSCAN12
				RP13-467H17.1		RP11-358L4.1
				PIK3CG		PEX1
				RP11-12A20.2		RP11-77H9.2
				AL591708.1		FOXD4
				AC005253.2		CTB-113P19.5
				CROCCP4		SLC35F6
				FGF22		ELF4
				KRT8P12		ZNF653
				TXK		RHBDF2
				RP11-496I2.5		KIAA0196-AS1
				RP11-327F22.6		GTF2H2B
				RP11-219D15.3		C14orf169
				IRS1		RP5-837J1.2
				RP11-359E3.4		CTD-2003C8.2
				ZNF432		PTPN7
				RP11-305E6.4		RP4-800J21.3
				KIAA1211L		ODF3B
				RP11-49I11.1		RP11-320M2.1
				OSCP1		PAQR7
				SLC23A3		EHD3
				RP5-994D16.9		TMEM127
				CTD-3128G10.6		RP11-448A19.1
				MROH8		TMEM186
				LPAL2		GNB1L
				NAPSA		GATAD1
				BAI1		RP11-175P19.2
				RP6-65G23.3		FLAD1
				C19orf73		PPWD1
				PSD4		ADAM1A
				RP11-138I1.3		WDR81
				DNAAF1		AL353898.3
				GPR135		MAP3K11
				TNFSF15		TOP3B
				ZNF565		AC009120.3
				CTTNBP2		RP11-890B15.3
				CDK20		MEF2C
				PPAN-P2RY11		ARHGAP30
				RP3-395M20.9		LEMD2
				RP11-218M22.2		DCAF10
				ATP7B		TRMT10B
				SLC25A5P1		RP11-1109M24.16
				KIAA1614		TFAP4
				TCEB1P19		IGDCC4
				AP000254.8		SFR1
				SCML4		AGGF1
				LRRC55		RP1-39G22.7
				RP11-106M7.1		CCDC97
				MBLAC2		POLI
				CTC-344H19.4		RP11-264B17.2
				ZNF137P		GPANK1
				RPL23AP7		ZNF786
				RASSF6		SLMO1
				RP11-568N6.1		FAM72D
				RASSF4		SLC25A42
				RP11-286N22.10		CTC-428G20.6
				SLC16A6P1		PPP1R3D
				TMEM130		PURB
				CCDC68		CTC-281F24.1
				RP11-455F5.3		RP11-384K6.2
				AHDC1		RP11-540A21.2
				VASH2		SLC33A1
				THA1P		YAE1D1
				ZNF826P		PRUNE
				RP13-1032I1.7		ANKRD46
				ALKBH3-AS1		RP11-731C17.2
				ADAMTS15		REXO4
				DENND2D		RP11-226L15.5
				RP11-1299A16.3		MFSD7
				CTD-2619J13.17		RP11-817O13.6
				TIMM22		RP11-244O19.1
				NEDD8-MDP1		LINC00341
				FOXRED2		RP11-111M22.4
				RP11-875O11.1		TIGD2
				DND1		ABHD16B
				ERLIN2		RP1-257A7.5
				RBM44		ZNF232
				VIPR1-AS1		ZNF804A
				STAB2		RP11-343N15.5
				CTSH		FAM86B1
				GCHFR		FAXDC2
				DUOX1		RP1-309F20.3
				LINC00320		STK32A
				CTD-2314B22.1		RP11-1149O23.2
				TBX6		RP13-36G14.4
				RP11-98G7.1		C16orf71
				AC003092.1		FAM134C
				CORO6		THEMIS2
				RNF32		SMCR8
				THBS4		MAVS
				HNRNPCP1		HEY2
				CRAT		ZNF391
				ERP27		SNORD60
				OR4C6		EIF3J-AS1
				SLC26A9		RP11-400F19.18
				ZNF556		RAPGEFL1
				PLEKHA6		CCDC137
				B3GALT4		HARBI1
				HSPA12B		CTD-3193K9.3
				RP11-415F23.3		TAPSAR1
				CTA-246H3.11		ZBED5
				LLfos-48D6.1		B3GNT9
				AC093510.1		RIMBP3B
				PGLYRP1		C19orf55
				ZMYM4		SLC35C1
				GID4		TVP23C-CDRT4
				FAM72A		RP11-38L15.2
				ISLR2		ZSCAN16
				RP11-1070N10.5		METTL23
				RP11-425D10.10		FAXC
				RP4-673M15.1		RP11-443B20.1
				RP11-96K19.2		C15orf65
				ASTE1		RP11-131H24.4
				TNK1		MIR296
				TFCP2		ZFP69B
				GGT2		RP11-141O15.1
				LRRC16B		RP11-139H15.1
				GLTPD2		TBC1D3C
				ICOSLG		NFKBIL1
				RP11-290F24.6		LYSMD1
				RP11-423G4.7		AC000068.5
				DLG4		RP11-819C21.1
				MMP23B		RBM15B
				RP11-399O19.9		SMG9
				RP1-81D8.3		HCP5
				ALG9		SPSB1
				SPATA6		RP11-1072C15.4
				LINC00176		RP11-830F9.5
				AC145123.2		MED9
				RP1-193H18.2		C2orf82
				LL0XNC01-116E7.2		FBXO48
				LIMD2		PSMA2
				RP11-16N11.2		AC068134.10
				RP11-677M14.3		LRFN1
				KCNAB3		NAT6
				GPRASP2		ERCC4
				DHX58		RUNDC1
				RP11-103J17.2		ZSWIM4
				LCK		ZNF557
				RP11-15H20.5		RTN4IP1
				EID2B		SCYL3
				SYNGAP1		PQLC2
				CSMD1		MTFR2
				CTC-479C5.12		KNSTRN
				HELQ		CASP8AP2
				LILRB2		LCA5L
				AC007255.8		WDR92
				NAGS		RP11-196G18.23
				GBP3		GABRR2
				SLC12A8		ZNF324B
				NUDT6		ZER1
				FAM13A-AS1		NOX1
				RP11-419C5.2		RP11-340F14.5
				RP11-603J24.5		CMTM1
				RP5-1028K7.2		ETAA1
				GRIN2D		RP11-104N10.1
				VNN3		SLC23A1
				C4A		HCG27
				XXyac-YX65C7_A.2		RTP4
				RP3-322G13.5		TGIF2
				Z83851.4		MAP3K14
				MEIG1		WDR53
				FLNC		FAM208A
				TMCC3		KHNYN
				RP11-163E9.1		METTL1
				SSUH2		AC009120.6
				RP11-530N7.3		C12orf43
				EPHB6		CTA-246H3.12
				C6orf222		RP11-187C18.3
				CTC-479C5.17		CERKL
				RP11-484K9.4		RGS19
				RP5-966M1.6		C1orf131
				ATP8A2		USP27X
				RP11-284N8.3		SH3BP5-AS1
				SCN3A		MLYCD
				RAB6B		GIN1
				HVCN1		SMAD6
				HRH1		DOLK
				SPATA25		HDHD1
				BAIAP2		PRR3
				KLHDC7A		SOS1-IT1
				USP11		PCYOX1L
[truncated: 254 more rows]

## Sheet: Sheet1
Functional enrichment of genes differential across Sensitive and Resistant MM cells treated with THZ531

## Sheet: UP GENES OVERLAP
451 elements included exclusively in "8226 200nM":	122 common elements in "KMS18 200nM" and "8226 200nM":	269 common elements in "KMS18 200nM", "KMS28 200nM" and "8226 200nM":	124 common elements in "KMS28 200nM" and "8226 200nM":	1986 elements included exclusively in "KMS18 200nM":	1771 common elements in "KMS18 200nM" and "KMS28 200nM":	1520 elements included exclusively in "KMS28 200nM":
LINC00884	PRSS12	SLC7A5P2	CROCCP3	IGLC4	SFT2D3	RP11-281P23.1
RP11-374A4.1	RP11-413M3.4	TMEM75	RP11-175B9.3	NLRP2	RP11-815J4.6	MT-TL2
NBPF7	TAS2R18	RP11-701P16.1	RP11-432J9.5	RP11-498D10.6	AC073130.3	TRIM7
CTB-50L17.5	RP11-46O21.2	RP13-228J13.6	GRAMD1C	ANGPTL3	FTH1P16	AC025442.3
RP11-983P16.2	RP11-180M15.4	AC104134.2	RP11-197K6.1	RP11-517H2.6	CADM2-AS1	GOLGA8B
RP11-134N1.2	RP11-101O6.2	CTB-31N19.3	CTD-2012K14.6	C1ORF220	AC022173.2	RP11-860B13.1
AC009951.2	MIR5587	RPS12P31	XKR8	RP11-460N16.1	IER5L	RP11-357N13.3
AC053516.1	RP11-420K14.6	AC092017.1	GRM1	HSPE1P3	C11orf96	ARRDC3
CTD-2527I21.14	AC091171.1	EID3	CERS6-AS1	FUT5	CTA-276O3.4	RP11-686O6.2
HSPD1P11	SLC13A5	AC090804.1	LINC00899	PCSK6	AC004837.5	AC023490.1
RP11-507M3.1	RP11-674N23.4	HIST1H4C	PARP15	RN7SL200P	AGAP1-IT1	UBE2N
MIR5581	SCN3B	RP11-166B2.5	ENPP5	AC079398.1	MAFB	CTD-2013N24.2
CT55	RP4-742C19.12	RP11-540O11.4	RUNDC3B	RP4-555D20.4	PKD1P5	PPM1B
PARD6B	GPER1	RP11-231P20.5	PHF21B	MAFA	RAPH1	RP11-296A18.3
RUSC2	RP11-875O11.2	PCDHA9	PLA2G5	RP11-732A21.2	RP11-102M11.1	PNN
RP3-437C15.1	RP3-325F22.3	RP11-119H12.4	RGL3	GHR	AC137932.6	TTN
FAM90A1	LINC00466	SNORD3B-1	FAM84B	HHIPL2	PHBP12	C3orf67
FPGT	RP11-354E23.5	RP13-766D20.1	GUCY2F	CTD-2235C13.3	RPA4	AC008132.13
LMO2	LINC00908	NAP1L4P1	EPHA1-AS1	KIAA1257	AL163193.1	RP11-452G18.1
AC005786.5	CTD-2526A2.2	FDX1P1	RP11-421E14.2	RP11-478P10.1	RP11-214O1.2	RP4-706G24.1
RP11-387H17.4	CSMD3	RP11-456P18.2	SLC47A2	PDE1A	RNF103-CHMP3	RAB28
CXorf57	CDH8	RP11-392O18.2	PRKCH	RP11-705C15.4	RP11-21J18.1	KATNBL1P3
EPN3	AC069363.1	RP11-138A9.2	RP11-515E23.1	POU6F2	PPIAP2	RP11-440G9.1
RP11-56B16.2	AC069547.1	SNAI1	RP11-61K9.2	RP11-72M17.1	EMP2	A2ML1
LINC00086	HIST1H2APS4	IER3	CACNB4	AC124914.3	RP11-436M15.1	MED4-AS1
PRAMEF1	RP11-755B10.3	TNF	CTD-2275D10.2	CECR2	CTD-2523D13.1	EHBP1
TMEM17	RP11-481A20.11	Y_RNA	SLC25A41	CTD-2270L9.2	SLC7A5P1	LRRC71
RP11-58A11.2	RP13-16H11.5	RP13-638C3.3	RNU6-97P	AL512652.1	LIFR	MID1
UPB1	RP11-676J12.4	RP11-230C9.3	CCDC170	PCDH10	OTP	SORBS1
ITGA6	DDC8	RP11-135A24.4	RP11-380G5.2	FLG-AS1	RP11-576C12.1	CRIP1
GDF9	RPS7P1	AC011247.3	CTA-85E5.10	KRT17P2	CTD-2024I7.13	LL22NC03-N64E9.1
KCNK4	B3GALT5	RP11-888D10.4	FUT6	ZNF695	RGPD8	RP5-1109J22.1
RP11-45P15.4	BMS1P17	MIR663B	C14orf37	CGNL1	CTB-193M12.3	RIC3
ATP8A2P3	S100A14	RP11-247I13.3	MAPT-AS1	TUBB2B	RP11-533E19.3	RP11-415F23.2
RNU7-117P	MT2A	RP11-28F1.2	C19orf80	RP5-951N9.1	RPS7P3	AL512428.1
IL19	ANKS4B	RP11-617D20.1	AC004824.2	CLSTN2	SNORD3D	RP5-886K2.1
RP11-452K12.4	DOCK5	UBE2FP1	RP11-361M10.3	RPS2P7	GK3P	AC078852.1
CEBPD	C2orf62	RP11-80H5.5	FAM83C	RP11-359D14.2	PCDH8	RP11-998D10.7
XXbac-B444P24.8	SERPINB8	RP11-332J15.4	AC118278.1	MATN4	PLG	CTC-326K19.6
PLA2R1	AADAT	CHMP4BP1	C1orf64	RP11-142G1.3	RP13-228J13.8	RP11-34P13.13
RP11-411K7.1	AC004076.7	RP11-173A16.2	G6PC	FAM221A	CCL3L1	RP11-154B12.3
RP11-434H6.7	LAMB2	RP11-452J21.2	LSP1P3	SULT1C2P1	RP11-245C17.2	MTURN
NPC1L1	GS1-279B7.1	MIR663A	TMEM176A	RP11-932O9.9	MARK2P8	RN7SL312P
RP11-18B3.2	PWRN1	DUTP1	RP11-27G24.1	SUSD5	RP11-685G9.2	FURIN
MID2	ESPN	RPL15P18	HIST3H2BB	CCL16	OCLM	ZNF841
AC010336.1	AC013448.1	RP11-278A23.2	CTD-2206N4.4	GALNT4	RP11-334G22.1	RFC3
PLEKHA4	GCSAML	RP1-134E15.3	ASGR1	LXN	IER2	AP002958.1
SLC11A1	RP11-327I22.6	AC008938.1	AC005785.2	GBP5	RP11-162A12.3	STXBP5-AS1
DNM1P51	TMEM52B	AC019221.4	MTHFD2P1	RIPK4	C19orf45	RP11-376P6.3
CXorf22	RP11-420A23.1	FAM166A	C14orf144	ZNF114	ST7-AS2	PRTG
RN7SL729P	CTB-184G21.3	SNORD3B-2	CSMD2	GABRR3	RGS17P1	EEF1A1P5
CTD-2530H12.1	RP11-166D19.1	AK3P3	RP3-342P20.2	UGT1A8	KDELC1P1	RP11-629O1.2
AC096579.1	RP11-462G12.1	RP11-830F9.6	AC074391.1	GS1-166A23.1	PRDM9	RN7SL279P
DLX6-AS1	GSG1	AKR7A2P1	RP11-493E3.1	RP11-264I13.2	AC006042.8	ARAP1-AS1
ZFHX2	AP000679.2	CTD-2286N8.2	ACVR1C	ENAH	CCNJL	RP11-175P13.2
CCSER1	CTC-384G19.1	MIR378A	CSF2RA	TMEM72-AS1	CTD-2013N17.1	SCARNA13
RN7SL533P	C1orf127	RP11-10J21.4	LINC01116	NCCRP1	TXNP6	RP11-190C22.8
RP11-382J12.1	HRC	RPL4P6	SLC15A1	SLCO4C1	RHOB	MSMO1
ACSL6	RAPGEF4	RP11-133O22.6	CTB-107G13.1	PPEF2	UPF3AP3	SNRPGP18
RP11-728E14.3	AC092198.1	MIR3687	hsa-mir-3181	RP11-586K2.1	JUNB	NME2
RP11-715J22.2	AL022344.5	SNORD11	GATSL2	SMURF2P1	RP1-168P16.2	CTD-2521M24.8
MIR4258	LTC4S	SLC7A11-AS1	RP11-887P2.6	RP11-320G24.1	RP11-63K6.1	IDSP1
RP11-326C3.2	SPATA31C1	RP11-28G8.1	FXYD3	RP11-1277A3.3	PPP1R14BP3	HNRNPA1P4
RP6-109B7.5	CTD-2267D19.2	LINC00273	WDR38	RP11-542M13.3	RP13-638C3.6	AC012317.1
CTA-714B7.4	ARX	SMG1	ATP1B2	2003-03-01	FAM13C	TUSC3
TTLL13	RP13-492C18.2	AC004471.9	CLIP4	CLEC1A	RP11-600F24.2	RP11-1167A19.2
LINC00222	RP11-65L3.2	AC015849.13	RPS27P29	RP11-587D21.1	HIST2H2BE	PADI2
CDH2	CTB-161M19.4	RPS14P3	PRDM16	RP11-381O7.4	RP4-591B8.2	RNU6-33P
IFI27	RP11-460E7.8	FCF1P1	PRND	LINC00887	TSC22D3	RBM20
RP11-1H15.2	RN7SKP173	CTD-2003D5.1	DNAJC25-GNG10	LINC00202-2	ZNF750	KAT6B
CTD-2609K8.3	RP11-578F21.3	HIST1H2AJ	RP1-34B20.4	RP4-604K5.3	FNBP1	RPF1
CBLN1	ACTRT3	COL8A1	RN7SKP30	CSF2	SERPIND1	RP4-598G3.1
PCDHGB2	PTPRC	RNU6-574P	CACNA1G	BTBD19	RP11-118F19.1	RP11-1140I5.1
ST5	RP5-1159O4.1	UBA52P8	RP11-353N4.8	CARD14	SNORD3A	MCAM
CTB-25B13.6	DNAH14	CTC-453G23.4	CTD-3222D19.2	SP6	SERTAD1	LTF
RP11-475C16.1	RP11-17G12.2	CTD-2262B20.1	RN7SL472P	LL22NC03-86G7.1	RP4-669B10.3	CD83
RN7SL537P	RP11-359K18.4	RP13-638C3.2	FUT3	RP11-71H17.1	TUBB2A	RP11-354P11.4
VSIG8	LINC00582	snoU13	RP11-474P2.4	UGT2A1	CTD-2371O3.2	RP11-572C21.1
XX-C2158C6.2	RP11-98D18.17	RP11-258F1.1	RP11-65M17.3	DLC1	AP000580.1	MYH10
MAGEA2	RP11-465B22.8	MGC4771	KLHL3	SLX1B	RP11-32D17.4	TTLL9
ERI3-IT1	MIR4736	RP11-73M18.11	PPP1R27	BTBD6	SPRR2D	AC068279.2
AC069277.2	PPP1R1B	RP11-51F16.5	RP11-325P15.2	CD36	RP11-271C24.3	HAVCR2
KCNG1	RP11-371E8.4	RP11-44I10.3	PCDP1	RN7SL18P	IQCF1	CTD-2201E18.4
SLC37A1	RP11-293A21.1	ALMS1-IT1	RP11-467P9.1	C14orf132	RP11-61L19.3	RP11-141M1.3
RP11-434I12.2	KIF13A	RP11-454L1.2	RP11-181K12.2	PHBP15	RNY1P6	FUT10
LA16c-313D11.12	MMP23A	MTND4P15	IER3IP1	SCARNA3	KLHL11	NFXL1
PRSS33	PHC1P1	NUTM2F	AC093802.1	AK1	YAP1	GNG12
RP11-339B21.10	RP11-693N9.2	TYRO3P	RP1-65J11.5	DDX3Y	RNA5SP219	STX7
AC147651.3	RP11-363D14.1	RP5-1132H15.1	MIR4479	AC011330.5	CCL3	UTY
ZPBP2	PVRL3	RP11-182L21.5	RP11-44F21.5	RP11-655H13.2	PBOV1	RP11-15J10.8
U3	CTD-2553L13.4	AC007389.3	MSI1	PLXDC2	AL133262.1	VRTN
RP11-268G12.1	RNU4ATAC	AC004063.1	THSD4	RP11-702F3.1	RP11-32B5.7	C20orf166-AS1
ASAP3	RP11-176F3.7	AL357936.1	NFIB	CRIP2	ID2	RP11-439C15.4
SH3TC2	ZNF286B	AC092574.2	RNU5E-4P	PIGH	RBL1	CTD-2509G16.2
RP11-342I1.2	RPL7AP31	MIR22HG	RP11-497H17.1	FAM196B	RP4-724E16.2	RP11-25K19.1
IBA57-AS1	ZNF460	MEX3B	EPS8L3	EPHA1	RP11-171A24.3	RP11-316M1.3
RP11-480G7.1	LINC00598	RP1-56K13.2	RCOR2	CREG2	BAAT	NUDT11
SCHIP1	PRSS23	VASN	RP1-67A8.3	MYCBPAP	RP11-350J20.5	BAHD1
AC005394.1	YPEL1	RP11-266L9.2	RP11-53B2.2	AC008079.9	RP11-769O8.1	MORF4L1P1
AC007292.4	AC084117.3	BACH2	RP11-342F17.1	MAP1LC3B2	STON2	TTN-AS1
CCDC80	RP11-124D2.7	RN7SL738P	RP11-624J12.1	RP4-591N18.2	PLN	SNORD53_SNORD92
RP11-396C23.2	RP11-197P3.5	HCRT	RHBDF1	RP11-167N24.4	JUN	XBP1P1
GALNT3	CPN2	CTD-2547E10.2	C22orf15	TPTE2P6	MAGI3	HEXA-AS1
XXyac-YX65C7_A.2	RP11-143A12.3	RP11-343H5.6	AC012360.4	RN7SL246P	RP11-346I3.2	RP11-76G10.1
KIAA1024L	C10orf32-ASMT	MIR3648	RP11-577H5.1	LRP2	TMEM14E	ZIM2
RP11-355N15.1	GIMAP1	COL10A1	SDS	APOE	RYKP1	PMEL
MCCD1	RP4-714D9.5	CSNK1G2-AS1	MIR1539	CDHR5	ZNRF3-AS1	RP11-491F9.1
THA1P	DCST2	RP11-565F19.2	FAM201B	RP11-323C15.2	INO80D	RP5-940J5.9
RBPMS	AC010980.2	RP1-64K7.4	MIR4734	AC003005.2	LINC00610	SOGA3
RP11-782C8.5	RPL21P119	RP11-489E7.4	RGS9	TSPAN13	HIST1H4K	RP11-122K13.12
CTD-2256P15.1	RGS22	AURKAPS1	LTBR	ANGPTL1	RP11-631M6.3	NUTM2A-AS1
RP11-661P17.1	CTC-273B12.10	PRDM12	RP11-304L19.2	AC004854.4	P4HA3	AC004237.1
RP11-62F24.2	LRRD1	NUTM2G	RP11-29H23.4	GADD45A	CES4A	RPS6KA1
POTEM	RP11-220I1.5	AL008721.1	LSAMP	COX6B1P5	SPRR2A	CTD-2186M15.3
CTC-513N18.6	C1orf168	RP11-1023L17.1	AP003096.1	AC145343.2	DDX18P1	DCAF5
TMPRSS2	RP11-77K12.3	TMEM150C	MCMDC2	RP11-793A3.2	RP11-142O6.1	TRHDE-AS1
CTD-2507G9.1	RP11-472M19.2	PPIHP1	BTBD18	RP5-1139I1.2	RP13-93L13.2	RNA5SP229
SAP30L-AS1	CTD-3224K15.2	NNAT	HIST1H1E	LRRC48	HMGB3P14	WHAMM
PROS1	RP11-120K24.3	RP11-358B23.5	NTN3	ZFPM2	SHQ1	ART3
IL1A	CDHR4	AC017083.1	AC105402.3	LIX1	RP11-156E6.1	CHRFAM7A
RN7SL595P	DUX4L4	SLC52A1	RNU1-59P	LL0XNC01-116E7.4	GPR82	SNAP25
RP11-475A13.1	MFAP3L	RUNDC3A	TCEA1P2	TMEM52	RP11-294O2.1	ATP8A2
RN7SL287P		CTC-548K16.6	TERC	TNFRSF10D	SSBP3-AS1	FKSG61
AC004449.6		POMK	INPP4B	AC233263.1	RP11-737O24.2	RP11-397J20.1
RNU6-548P		RP11-122A21.2		RP11-206L10.8	RGS2	ARHGAP42
CDCP1		HSPE1P11		RP11-80I15.1	RP11-58E21.1	AC107072.2
CAPN14		RP11-299H22.6		RP11-98D18.9	STK31	RP5-1198O20.5
CYP3A4		RP5-1000K24.2		AL353608.1	CCL3L3	RP11-429B14.1
LINC00923		PRKCE		AC016745.1	PITPNM2	AL138479.3
TIE1		NOG		RPS11P6	RP3-337H4.6	ITGAD
CYP2B7P		RP11-1149M10.2		ZDHHC20-IT1	PHBP6	ZBTB46
CTA-384D8.34		CTC-250P20.2		CYP4A22-AS1	RP11-114M5.1	TIGD1
CCAT1		RP11-16C1.2		RP11-977G19.10	RP11-77K12.4	GBP4
GGTLC2		CTD-2622I13.3		RP11-6B19.1	PLK2	RFPL1S
AC003002.6		ID1		CTD-2561B21.5	HSP90B2P	ARHGEF4
RP11-338N10.1		MIR3680-1		RP11-521D12.2	ETV5-AS1	BAIAP2-AS1
RP11-400N9.1		MIR3680-2		ATE1-AS1	UQCRBP1	TNR
RP11-435B5.3		CTD-2288F12.1		CTD-2547H18.1	RPS4XP14	RP1-272J12.1
RP1-265C24.8		RP11-116D17.2		RN7SL439P	CDKN2D	LINC00607
RP11-258C19.4		RP11-180P8.1		RP11-1415C14.4	RP5-892K4.1	INMT
RNF144A		RNA5-8SP6		RP11-126O1.5	ZNF703	RP11-47I22.4
RP11-421N8.1		RP11-653B10.1		RN7SL353P	CHD6	RP11-30J20.1
LA16c-OS12.2		RP11-767N15.1		HLA-G	ACSM2A	SMAGP
AP000253.1		RN7SL155P		CNTN4	RP11-820K3.4	AC009133.21
RP11-727F15.11		RP11-775D22.3		RP4-728D4.2	RP11-717D12.1	RP11-677N16.1
RP11-90K6.1		HNRNPA1P7		RP11-295M3.2	DDIT4	PHF20
RP11-362K14.6		CTD-2382E5.4		RP11-473O4.4	RP11-767N6.2	UHMK1
MAPKBP1		AC079305.10		SV2C	RP11-161H23.10	HOOK3
LDLRAD4		CTD-2349P21.5		AC114812.9	CTB-31O20.2	CYTIP
ANKUB1		AXIN2		TRAC	RP4-814D15.2	DCLK1
NOL9		BMS1P18		RN7SL276P	HELZ	HCAR1
AL627171.2		LA16c-313D11.9		ZC3H12D	AC010524.4	AFAP1
CTC-564N23.2		RP5-1158E12.3		RP11-323N12.5	RP11-665G4.1	ALS2CL
MS4A6A		RP3-337H4.8		RP11-266L9.5	C11orf44	RP11-206L10.9
RP11-513M16.7		ZNF540		MRVI1	MNX1	RP11-703G6.1
RP11-324H6.5		AC073333.8		AC073133.1	CDKN1C	PSG5
CASS4		RP11-471M2.3		RP11-38M8.1	GPR22	PLCB2-AS1
RP11-793H13.8		RP11-467H10.1		INSL4	GNAI1	KIAA1683
CTD-2010I22.2		RN7SL443P		PLEKHG6	SUV420H1	C14orf23
RPLP0P6		SETP5		ASAH2B	LINC-PINT	RP1-127D3.4
RP11-134L10.1		AC005229.1		PSD3	RNF138P1	GLRB
AC078993.1		ARGFXP2		LIPH	CTD-3092A11.1	AC007383.3
GUCY1A3		TMEM110-MUSTN1		ADAMTS9	ZFP36	ZNF709
HLF		RP11-198M15.1		RP11-288H12.3	RP11-364P22.1	TNPO1
PRSS21		PKNOX2		RNU6-194P	PRELP	AL133228.1
RN7SL146P		Z73979.1		AC017074.2	GAD2	RP11-158M2.3
FAM230B		CTD-2639E6.9		AC069257.8	RNU2-27P	CASP12
CTD-2283N19.1		NOS1AP		RP11-1094M14.5	AC010226.4	C1orf216
GPR162		GHc-362H12.3		AQP10	RP1-168P16.1	PCNPP1
PCBP3		RP11-402D21.2		PKN3	WDR7	CR1
OCIAD1-AS1		RP11-149I2.4		ARHGAP8	AC018890.4	GPR137B
SLC2A10		RP11-173D3.1		UNC93B7	CFTR	CTD-2105E13.6
MIR1-2		RP11-715F3.2		RP1-128M12.3	HIST1H3H	HTR7
RP1-37N7.1		RP13-93L13.1		LINC00471	VNN1	RP11-267C16.1
RP11-310P5.1		PRKAG2-AS1		RPL32P29	CLDND2	PAPPA2
NIPSNAP3B		S1PR1		CHRM3	HSPA8P3	SLAMF1
AC008703.1		RP11-895M11.3		FAM101B	HMGB1P41	SREK1IP1
RP11-110I1.5		KLF7-IT1		RP3-476K8.3	AC003102.3	LRRC58
AC018755.1		FILIP1L		RAB4A	RP11-513N24.1	TRIM59
RP11-166B2.7		RP11-54O7.11		LY86-AS1	MIR4787	NANOS3
MMP24		RP11-495K9.5		RP11-481E4.2	AP000692.9	NXNL1
RN7SL770P		CCDC158		RN7SL524P	RP11-449P15.2	AC003035.1
RP11-308N19.1		CTC-246B18.10		PRDM7	RP11-160A9.2	MED13L
GFRA1		PARD3B		PITPNM3	AC006480.1	FRG1B
CTC-550B14.6		AC005540.3		IFNG	RP4-800M22.1	SLIT1
IZUMO2		FLRT1		RP4-784A16.1	RAB42	RP11-1250I15.3
RP11-286E11.1		RPL29P14		M1AP	RP11-277P12.20	AC068039.4
C20orf26		RP11-342C24.8		RN7SL149P	TRAF3	VCPIP1
RP11-256L11.1		RP11-102M11.2		CTA-797E19.2	hsa-mir-490	RP11-616L12.1
RP11-70F11.8		RP11-66B24.2		AC006042.7	EPS8	AC079949.1
AC010127.3		TSSC1-IT1		RP1-267L14.3	AC092964.2	REL
INHBA-AS1		RP3-395M20.12		P2RX2	TBCAP3	FPR3
AC007773.2		CTD-2083E4.5		HSPE1P10	FOS	AC026188.1
CYP1A1		ULK4P2		RP11-481J13.1	RP11-100G15.3	AF241726.4
SLC36A4		RP11-25G10.2		OPLAH	ANLN	RN7SL288P
RP11-33A14.1		POC1B-GALNT4		SMCR5	PRICKLE2-AS3	RP1-122O8.7
RP13-188A5.1		AC009303.1		NMUR1	LRRN4CL	NRBF2P5
RP11-375O18.2		RP11-276H1.3		TMEM191C	MED12L	GS1-115G20.1
FAM153B		RP13-766D20.2		LINC00924	ZNF704	MPZL3
RN7SL56P		RPS15AP10		RPL36A-HNRNPH2	KNOP1P2	MIR1255B1
FEV		CLIC3		FBXO16	AGO2	ALDH7A1
RP1-150O5.3		LRRC4		GSTM3	RP11-108M9.6	AC011453.1
CTC-338M12.9		SLC2A13		RP11-402J6.1	CTD-2012K14.7	ZBTB32
NCKAP1		GGT6		CDH9	ATP1B1	RP11-465I4.2
RP1-199J3.7		RNVU1-6		CFL1P5	TOB1	JPH4
SPAG6		FAM160A1		LINC01067	RP11-56B16.5	CTC-451P13.1
RP11-671J11.4		RP11-109G23.3		TNFRSF13C	CREBRF	SLC35G6
C2CD4A		TMEM88		RP11-123K19.1	RP11-558A11.1	HNRNPCP2
RP11-13N13.2		RNA5SP428		FRG2C	AP001172.2	RP11-225B17.2
LSMEM2		RP11-2B6.3		APBA2	AC003003.5	CAHM
EMCN		TCEA1P4		NRF1	RP11-32B11.2	MRPL44
ANKRD30BL		RP1-20B11.2		RP11-707P17.2	CBX3P5	HIPK3
AC019205.1		RP11-78F17.1		AP001439.2	RP3-468K18.6	RP11-47I22.3
RP11-433J8.1		ZHX1-C8ORF76		ACSL3	LINC00402	AL645728.2
RP11-43F13.1		AC097658.1		EEF1B2P3	GADD45B	GPRIN2
HBQ1		NPM1P26		RP11-204L24.2	RP11-703M24.5	RP11-584P21.2
ITGA8		RN7SL800P		MAPRE1P1	NXF1	FRMD4B
YWHAQP5		SNORA23		AL158147.2	LCOR	MIR4519
LINC00886		GFI1B		RP1-93I3.1	RP11-411B10.3	HIST1H1PS1
KB-1471A8.1		CTD-2105E13.13		RP11-253A20.1	WDR47	SLCO1A2
RP1-29C18.8		LPAR6		LY86	AGO3	RP11-357F12.1
IGLV3-16		RP11-255E6.6		CTD-2117L12.1	RN7SL128P	ALOX12
AP003385.2		CGRRF1		ELF3	ITPK1-AS1	MIR940
RP11-182J1.5		RP11-697N18.3		LINC00608	RN7SL107P	PIGR
ECI2		NRN1L		RP1-155G6.4	RP11-216N14.7	AL391803.1
RP6-114E22.1		RND3		RAPGEF5	PGAM1P11	NACC2
CTD-2291D10.1		MIR374B		C5AR1	RP11-848P1.5	CNKSR3
RP11-407G23.3		RP11-568J23.6		RN7SK	AC131025.8	IL21R-AS1
RP11-474G23.3		RP11-45M22.5		RP11-661A12.5	RP11-753N8.1	RP11-120D5.1
MMP25		SNORA36A		TNRC18P1	SLC10A2	RP11-13E5.2
RP13-726E6.2		RP11-820I16.3		AC017002.2	CDRT1	PRRC1
EPX		RP11-480I12.4		RP5-1063M23.1	RP11-119K6.6	RP11-730K11.1
MIR3179-3		SCARNA15		RP3-415N12.1	ZNF503	CCNG2
TNN		RP11-744N12.3		CYBRD1	TMEM158	LAMA4
AF127936.7		ADAMTSL4-AS1		CCR4	SOCS6	EGFL8
HLX		PCAT1		AL353898.2	TNFRSF19	SEC62-AS1
CTD-2256P15.4		AC005042.2		EIF3FP1	HIST2H2AA4	ABHD13
RN7SL865P		SNORD117		ONECUT3	RP11-700F16.2	RP11-465L10.10
PDE10A		Z98049.1		RP11-1030E3.1	AC010243.1	RP11-131K5.2
RP11-603J24.14		PLIN5		RP11-54O7.1	RALGAPA1P	TMC2
GS1-279B7.2		LA16c-316G12.2		SYBU	CTD-2017C7.1	EHD2
CDH12P3		RP5-837M10.4		RP11-575G13.2	RP11-769O8.3	NIM1K
CDH12P1		RP11-895M11.2		TP53TG3	EPHA7	CTD-2035E11.3
AC008753.6		HSPB6		LINC00671	RAB33B	EFNA5
GPC2		TRPM5		PYDC1	SOX9	RP11-1E4.1
RP11-54O7.17		HMGN1P8		SNORA14B	CTB-58E17.1	ERVW-1
INPP1		RP11-385E5.5		TNNT2	RASL11A	RP11-31F15.2
RP11-84C13.2		DRAM1		MIR1205	RP11-378J18.6	RP11-680F8.1
RP11-79D8.2		LL22NC03-N14H11.1		RASIP1	HUS1B	RP11-1148L6.5
CACNA2D1		BMS1P8		AC107983.4	SFN	CCDC106
RP5-940J5.3		EGR1		FAM43A	AL954742.1	PRF1
RNASE4		CTC-435M10.3		DCAF8	SYNE2	SPINK9
SNORA42		RP11-13K12.2		MURC	LINC00221	RP11-10O17.1
NDRG2		MRPL35P3		KLF10	NOTCH2	CLUL1
RP11-47I22.2		RAB20		SNX25P1	U4	CD8BP
SELL		ERRFI1		DGKB	CXorf67	AC005487.2
AL031768.1		RP11-12A16.3		RP11-475I24.3	SESTD1	JSRP1
IL7		ASIC4		RP11-385D13.3	GFOD1	CFHR1
hsa-mir-150		RP3-395P12.2		RP11-85B7.2	MSX1	SSX8
LINC00954		LRRC70		RP11-648K4.2	RP11-2B6.2	AVPI1
RP5-1091N2.9		CTC-137K3.1		TEX35	HIST2H3C	RP11-474I16.8
RP11-503E24.2		RP11-85G20.2		MMP15	HIST2H3A	S100A10
RP11-37L2.1		AC009502.4		STAC	CTD-2246P4.1	C16orf70
C1QTNF3		JRKL-AS1		SERPINE2	RP11-63B13.1	TACR2
C1orf61		CTB-131B5.2		RP11-362L22.1	YPEL2	RP11-615J4.3
REEP1		AC012322.1		DMGDH	POU2F1	ZNF665
ZNF668		Metazoa_SRP		SYCP2L	CTD-2145A24.3	C9orf96
RP11-141C7.4		MMS22L		RP11-411G7.2	CXCR6	AL645728.3
CLGN		MYT1L		AC073257.1	SCAF4	LMO3
FAM211A				CTD-2012J19.3	ADAM33	AP003774.6
RP11-805I24.1				CCDC36	NOVA2	MAGEB6
XXbac-BPG252P9.10				RP11-245M24.1	RP4-814D15.1	CTD-2328D6.1
C9orf85				KRT17P1	AC073127.1	SEC14L5
CDON				AC144449.1	RP11-473I1.9	AC061975.5
RP11-241F15.9				AC090616.2	CBR3-AS1	RASSF2
STK24-AS1				IYD	PDE4D	RP11-685G9.4
AC092159.2				C9orf139	CEP85L	CTD-2033A16.2
HIST1H3J				C11orf88	ERN1	GATA3
APCDD1L-AS1				RP11-480I12.7	DUXAP7	BTK
KCNN1				CTD-3064M3.7	RP5-872K7.7	OR11A1
RP11-110H1.4				RP11-246A10.1	CTA-398F10.2	LINC00857
GRIK5				AC027228.1	RP11-894P9.2	NAA15
AKAP6				RP11-191G24.1	RN7SL21P	AP001024.2
TCEA3				NWD1	UBN2	SNORA57
KRT18P5				AC007318.5	TANC2	AC005176.2
ANKRD30BP2				AC098973.2	SAT1	HIBCH
7SK				C2orf50	RP13-20L14.4	RNU6-975P
RP11-227G15.9				CTD-2384A14.2	RP11-473I1.5	RP11-65J3.2
ZFHX4				HAAO	RP11-597G23.1	RNU2-2P
RP11-46J23.1				RNU6-1203P	ARHGAP26	RNF222
RP11-247I13.11				COBL	RBM14	ZNF587B
RP11-529G21.2				ZNF580	ZNF236	RP3-323P24.3
C2orf83				AC104653.1	RP11-436M15.3	WT1-AS
PNLIPRP1				AC024569.1	RP11-44F21.3	PPP1R26-AS1
EMP1				RP11-170M17.1	AC109642.1	CTC-248O19.1
AP000347.2				RP5-951N9.2	ERC1	ZNF471
DOCK11				AC079412.1	AC069240.1	RP4-761J14.8
RP5-837O21.5				RPL7AP66	SPRY4	RP11-439K3.3
C15ORF37				KIAA0922	ZBTB34	LRRC26
CTC-338M12.6				HES6	RPL7L1P10	ZNHIT6
TTLL2				B3GALNT2	C3orf58	ASZ1
TICAM2				NLRP12	ODCP	AC005775.2
CACNA2D4				RREB1	CTD-2313J17.1	STK3
ISL1				AL391994.1	RP11-751H17.1	RP11-664D7.4
AL358113.1				RP11-211N8.2	RP11-158I13.2	CCNT1
ZNF804A				RN7SL274P	AP000525.10	AC138655.6
RP1-193H18.2				HMGN2P46	RP11-31F19.1	CATSPER2P1
PAICSP1				ABCB1	RP11-333E13.4	ARHGEF26
RP11-282K24.3				UIMC1	RP11-277B15.3	AMIGO2
RP11-589N15.2				AC093642.5	MT1X	PCBP1-AS1
RP11-155D18.14				KHDRBS3	AC068718.1	PCOLCE2
EXOC3L2				WNT9B	RYK	WDFY2
RP11-752D24.2				RP6-109B7.3	CACNA1F	ABCA6
GIMAP7				RP11-467J12.4	RN7SL166P	LPIN1
KIF25-AS1				ATF4P4	AC104472.1	FRRS1
RN7SL657P				AGMAT	JARID2-AS1	FAM133B
SLC30A8				RP11-473O4.3	RBM33	RP11-887P2.5
PLCXD2-AS1				B3GALT1	CREB3L1	PTCHD4
RP5-1112D6.7				CBX4	RNU1-106P	UGCG
MIR589				LINC00410	RP11-64D22.1	STAC2
FAM78B				CHD7	PRKX-AS1	AP003774.1
RP11-350G8.7				FAR2P2	SNHG9	CTC-425O23.2
ANO2				WDFY1	RAPGEF6	RP11-127H5.1
NR1I2				MAP3K8	ACVR2A	FLJ27365
FAM127A				RP11-674N23.1	FOXK2	2001-09-01
AP006621.6				FTX	NHLRC2	SLA
CKMT1B				NOS1	CUL5	HNMT
RP11-391L3.1				LAMA1	EFTUD1P1	RP11-328K4.1
TEX40				RP11-209D14.4	SYNJ2	UBE2Q2P3
LINC00114				SPACA7	LL22NC03-2H8.4	GUSBP2
TGFBR2				IRF6	NSFP1	EIF4HP1
KIF1A				MAGED4B	IRX5	ARHGAP39
NCLP1				SLC41A2	AC017104.2	RPP40
RP11-227G15.8				RP11-417B4.2	MIR181A1HG	CTC-325H20.2
MORN4				RP11-118B18.2	KANSL1	RP11-344B2.2
ACOT2				PTCHD3P1	AL138847.1	AC007567.1
RP11-107I14.4				IGHJ5	SEMA7A	CTD-2008L17.2
RPL21P121				SLC7A14	PPP2R3A	TTC3
RP11-275I4.1				CEBPB	ASPA	TRMT112P5
RP11-176H8.1				AGAP1	PPP1R12B	RP11-252K23.2
ARHGEF37				RP11-17P16.2	RP11-711M9.1	AC107079.1
RP11-78H24.1				GADL1	RP1-3J17.3	RNU5D-1
RN7SL665P				PCDHB11	SLC26A5	DGKQ
RN7SL465P				ANGPTL2	NRIP1	DNAL1
RP11-254F7.4				RP11-430G17.3	AL158077.1	C19orf26
FCER2				ADHFE1	SIAH1	RP11-663N22.1
AC087269.2				AC105316.1	RP13-216E22.4	NELL1
AC008267.1				NEUROG3	RP11-347P5.1	CA6
TTC21B-AS1				SOCS3	PODNL1	ZCCHC3
AMER3				RSAD2	TXNIP	BAIAP2
RP11-106M7.1				RP11-247C2.2	RP11-693J15.4	RN7SL397P
LURAP1				MTRNR2L5	HTR2B	AL031284.1
CFHR3				FOXH1	B3GNT2	MTND5P11
ACPL2				RP11-329B9.1	PRLR	RNA5SP455
RP11-439E19.1				APOH	RP11-395G23.3	HGD
KREMEN1				STX1B	AC012507.3	ROM1
MDS2				RP11-44D5.1	BRD2	ZIM3
RP11-69C17.3				KB-1410C5.3	RP11-375N15.2	RP1-217P22.2
CBLN2				PLXNB2	AP001885.1	RP5-994D16.3
RP11-625H11.2				RP11-73G16.1	POMGNT2	ACBD7
RP11-407B7.1				SLC2A9	HCST	RP11-364B6.1
AP000295.9				RP11-67K19.3	CPEB2	RP11-202K23.1
RP11-356B19.11				RP11-64K12.10	SPTLC1P1	AC174470.1
RN7SL349P				SESN2	AC026202.1	XX-2136C48.8
HIST1H2AH				AFF2	RN7SL285P	RP11-552M11.8
MLTK				ZNF462	JMJD1C-AS1	CTC-444N24.13
AL109761.5				RP13-608F4.8	ATP2B1	CTD-2325A15.5
BHLHE40-AS1				RP11-152F13.8	JADE1	DCP1A
FCGR2B				RP11-627G23.1	ANKRD36	RP11-317N8.3
SLC6A5				RN7SL798P	SCML1	TMEM41B
AL353671.1				BHLHE40	RP11-536I6.1	SPEF1
PSORS1C1				CDH19	ABCA1	CTD-3032J10.2
AC007250.4				RP1-140K8.5	NOSTRIN	AC006033.22
AC139451.1				RP11-250B2.3	RP3-455J7.4	AL096869.1
RP11-96K19.5				AC005831.1	ASH1L	RP1-86D1.2
IGHA1				SMOC1	LPP	RP11-594N15.2
RNF219-AS1				AC018738.2	DGCR5	SNORD119
AC012313.1				SPRED2	LINC01104	GJA1P1
CTD-2054N24.2				RP11-68I3.11	RP11-197M22.2	RP11-475O6.1
CTB-175E5.7				TUBBP1	RP4-794H19.1	RP11-121G22.3
OXCT2				MSRA	KRT18P31	EIF5AP3
ITGA1				RP11-51M18.1	FSCN3	DUX4L18
TRPM8				AC009132.1	MITF	VCX3B
CC2D2A				GBP6	TSC22D2	PLAT
LAPTM4B				BTBD3	ACVR2B	AC018696.6
CNTN1				DCX	CTC-820M8.1	AC113612.1
RN7SL832P				ADAMTSL4	GRAMD3	AC233263.2
IL36A				MIA	RP11-340B18.1	RP11-46A10.2
PLCB2				SLC3A1	HSD11B1L	HIST1H1D
MAP2K6				VGF	EPB41L5	RP11-382A20.7
RP11-673E1.1				RP5-1021I20.4	TACC2	AL138751.1
AIM1L				S100Z	SERPINH1P1	DMRTA1
AL049542.1				C14orf64	MIR3153	RPL12P38
AC012531.25				RP11-864J10.4	LINC01003	RP11-214K3.19
AC000120.7				DLX1	HIST1H4E	RPL29P11
AC108676.1				RN7SKP193	RP11-128A17.1	AL022344.7
KLK10				NAP1L5	RP11-85A1.3	AC114812.8
CRYZP1				S100A2	SNX32	PODXL2
ZNF747				RPS20P22	SPANXA2-OT1	KPNA6
GRB10				GRAMD4P3	DPYD	RP11-517P14.2
RP11-169D4.1				LDHAL6A	RP11-218M11.1	RP11-844P9.3
RP11-419I17.1				PHLDB2	MXD1	NAALAD2
RP11-497H16.5				CTD-2349P21.6	RNA5SP18	RGAG4
RP11-188D8.1				TTBK1	RP11-381O7.6	MIPOL1
RP11-10K17.3				RIMS4	SH3GL1P2	TMEM39A
XXbac-BPG249D20.9				RNF2	RP11-216M21.1	MGST1
RP11-494M8.4				CD8A	ARAP2	TUBA3C
AK4				LRRTM4	CEP170	TKTL1
PRRT2				RP11-514P8.6	NCOA1	RN7SL716P
TMEM98				AC083899.1	RP11-307L3.4	CD5L
CTD-2616J11.11				RP11-48G14.2	KIF1B	RP1-27K12.4
AQP11				MAPK10	SNORA50	FEM1C
RP11-318C24.2				MAST2	BTBD9	HOXC4
KRT18P59				C20orf194	FOSB	CTB-63M22.1
RP11-231I16.1				AC005779.1	SCT	SCFD2
WWTR1				PLEKHA5	NHSL1	HIST1H2BN
RP11-560A15.3				RP11-348F1.3	FBXW4P1	SLC25A30
RP4-569M23.2				LEMD1-AS1	C6orf141	AP000662.9
C3orf80				RP11-3P17.5	AC069513.4	AIF1
ZNF396				NIN	RP6-109B7.4	RP11-538D16.2
ST7-OT4				SLC13A4	HMGB1P24	MIR324
RP11-61L19.1				RP11-867G23.8	RNF152	AC138655.1
AC006486.9				RP4-701O16.5	SNX29	AL732314.1
RNF157				PLEKHO2	RP11-79M19.2	SLC7A11
RP11-509J21.3				CCBE1	ACTG2	MIR519A2
IGDCC4				SLC1A6	KLF5	ZNF622
TRPV2				BMS1P11	STAM	SAA2
RP11-815I9.4				AMFR	AC007563.5	RP11-6N17.2
RPL18AP3				CTD-2026K11.2	RP11-1078H9.5	MAB21L3
RP11-63E5.6				HNRNPA1P3	HECTD2	CMP21-97G8.2
PCDHB16				LRP12	SLC34A2	TBC1D10C
SNORA34				HOXB9	CTD-2600O9.1	CTD-3030D20.2
CPNE6				ATAD3C	SLAMF6	LINC00426
SORBS2				ABCA13	PPP1R13B	RAB14
CTD-3162L10.1				SORL1	SNORA51	RP11-1109M24.5
COL11A1				GPX8	CTA-339C12.1	IFI44L
PHEX				IQSEC2	IRF7	VENTX
RP13-467H17.1				RN7SL463P	PLEKHM3	AC025278.1
AC004917.1				RAET1E	PDXDC2P	RP11-646E18.4
RP11-166B2.8				POTEG	AGPAT9	RN7SL326P
AIRE				CCDC79	MTMR3	ZNF90
RP3-467K16.2				RP4-614O4.11	RP11-1018N14.2	RP1-197B17.3
LINC00896				ITPRIPL2	AF213884.2	HIF3A
PLEKHA6				VWA5B1	FST	TMEM81
CDH17				EPN2-AS1	CTA-797E19.1	AC103564.7
CTB-25B13.13				RP11-63M22.1	RP11-127B16.1	GMNN
GUSBP5				RP11-474P2.2	SOCS5	AC012513.6
TIAM1				ELN	RNF144B	RN7SL371P
TG				SPACA3	RNF19B	LONRF2
ASPH				RPL23AP53	TLE4	HK2P1
RP11-368M16.10				RP11-65J3.1	NR4A2	SNORA11
				LINC-ROR	RP11-58E21.4	RP11-175K6.1
				MIR1255B2	RP11-19G24.1	ZFP30
				CTD-2537I9.12	RPL7AP60	HGF
				PLA2G1B	PAXBP1	COL4A6
				RASSF8-AS1	CRY1	DNMT3L
				RP11-573G6.10	MAGI1-IT1	RP11-1C8.4
				RP4-613B23.1	ACACA	CTD-2116N17.1
				DDX60	MAP4K3	CTD-2514K5.2
				SAMD11	DUX4L19	AC139712.4
				RP11-689C9.1	RP11-16E23.4	RP11-115D19.1
				ZNF555	ZFP36L2	RP11-848P1.4
				CTD-2545M3.2	TMEM59L	RGS13
				RN7SL14P	HSP90AB7P	PLCB1
				VPS13B	RP11-297K8.2	ARL6
				GIMAP4	GPR110	RP11-79H23.3
				RP4-568F9.6	MYO1B	TTBK2
				AC104532.2	RP11-157P1.4	PPP1R16B
				RP11-17E2.2	BRAF	RP11-178L8.8
				RP11-80K21.3	SLC4A8	CTC-344H19.4
				MIR1273A	C1orf132	CTA-481E9.3
				RP5-1103G7.10	CHD2	AARD
				RP1-149A16.3	RANBP17	RP11-809N8.2
				RP11-15G8.1	CTD-2522E6.4	RP11-632K20.7
				RP11-428G5.7	RP11-103C3.1	TTC7B
				FRRS1L	KLF16	CHRNA2
				AC017002.1	LINC00477	RP11-454L9.2
				RP11-59D5__B.2	RSF1	MAN1C1
				CTC-250I14.6	RP11-454K7.1	AC006369.3
				MSRB3	RP11-39K24.7	ZNF644
				LZTS3	RP5-823G15.5	RP11-519C12.1
				KEL	AL139300.1	KIAA0907
				RP11-169F17.1	RP11-260E18.1	RP4-633I8.4
				CHRDL1	COG5	SRGAP1
				TMPRSS11B	FAM204BP	RP3-525L6.2
				LINC01155	APC	CDC42-IT1
				AICDA	NRG3	LINC00958
				RP11-680G24.5	RNU6-1153P	ZNF654
				CEP128	RP11-181E10.3	AC011747.4
				AQP3	RP11-139I14.2	SNORA65
				AC000068.9	CITED2	AL627309.1
				KRT18	KDM4C	CTC-479C5.10
				NDRG1	RNU6-1016P	CTA-223H9.9
				LIPG	NNMT	MUC21
				KIAA1958	AC073934.6	AL391380.1
				AC010733.4	TRIM36	MAPK1
				RP11-382A20.1	AC004510.3	DPPA4
				ID3	AC132192.1	AC103801.1
				RPL7AP6	HEXIM1	MT-TS2
				GPR4	SNX29P2	JAG2
				MGP	PPARGC1B	XXbac-BPG154L12.4
				XDH	FNDC3B	RP11-102F4.2
				TSPAN32	GAREM	ANO7
				SCARNA2	MSL2	RN7SL300P
				RP13-317D12.3	ZNF749	AC105053.3
				DNAAF3	RP11-367J11.3	RP11-613F22.8
				RN7SL255P	CTA-29F11.1	SPTLC3
				MESP1	CLK1	CTD-2538G9.5
				COLEC12	AC003051.1	RPSAP8
				TMEM204	MICAL3	USP9Y
				MME	SLC24A2	SHISA9
				RP11-107F6.3	EFCAB1	NYAP2
				RN7SL2	TUBGCP3	LGI4
				RP11-96H17.1	SYTL1	RP11-977G19.11
				SIGLEC10	TLE1	CTD-2576D5.4
				PHLPP1	AC011994.1	RP11-53I6.2
				AP000708.1	KRT8P50	RP1-74B13.2
				BEST2	CTD-2647L4.4	RP11-230C9.2
				RP11-471L13.3	RC3H1	TAF4B
				CTD-2540B15.12	SMAD5	EED
				FAT4	FOXD3	CRHR2
				AC018462.2	RP11-396N11.1	DUX4L2
				RN7SL839P	DYDC2	U91328.19
				PCBP2P1	CTD-2207A17.1	RP11-20D14.6
				IGSF10	TES	FBXO3
				ITPKB-AS1	AC034187.2	RIMBP2
				MIR4263	NFATC3	CLN8
				NOXO1	CPAMD8	RN7SL29P
				AC114776.3	MCC	MRPS17P1
				SLC11A2	RP11-216M21.7	RP11-358B23.1
				RP1-244F24.1	RPS6KA5	ZNF330
				RP11-133K1.7	AC003079.1	CYP4F8
				AC068706.2	RP11-473I1.10	RP11-375I20.6
				TMSB10	RP11-400L8.2	NUPR1
				RP11-401F2.3	ATF3	RPSAP6
				AC002551.1	CTC-265F19.1	GRIN1
				RP11-144N1.1	LRRC1	PFN1P8
				BZW1P2	TMEM2	TBC1D2B
				GPSM1	RGS16	RP11-754B17.1
				AC061975.7	AAK1	CTC-505O3.3
				AJ239322.1	RN7SKP79	OR7A5
				RP11-308B5.2	MIRLET7F1	AC004988.1
				RP11-855A2.5	RGS17	TEAD2
				LYPD3	MED13	PRRG2
				OR2A1-AS1	SERTAD2	RNF208
				AC090559.2	CTD-2410N18.4	DLG1-AS1
				DMRT2	RP11-637O19.2	CTAG1A
				SNORA80B	C10orf118	FMO2
				RP11-27N21.3	FGF21	FBXL17
				AC092620.2	LATS1	CDR2
				FCER1G	SIK1	PPP4R4
				BCOR	RP3-522J7.5	C10orf12
				RP11-277L2.5	RNF180	CFH
				BACH1	PARD6G	DCHS2
				MCOLN2	ZNF763	RP5-1065J22.4
				MIR421	PTPRK	RP11-439L18.2
				Z69666.2	LRP6	NOX5
				CTC-493P15.2	AL354936.1	GOLGA7B
				APBB2	AC003104.1	CTB-60B18.10
				MLXIP	DTNB	RP11-575L7.4
				RFPL3S	SSH2	RP1-90J20.11
				TDRD10	CTD-2127H9.1	H19
				GXYLT1	USP6NL	SNORD56
				AKAP9	INPP5F	RP11-838N2.4
				SLC10A3	EPC2	NRP2
				AC002511.1	RP11-296A18.5	RBM4
				TMPRSS15	PGAM1P10	LHX2
				RP11-157P1.5	AC024940.1	SVEP1
				TSNAX-DISC1	RP11-747H7.3	RP11-536P6.3
				RP4-790G17.7	PABPC1P1	RP11-713H12.2
				FAM41C	RLIMP1	PRC1-AS1
				TINAGL1	NFYA	FSD1L
				AC097724.3	ZFYVE9	COL5A2
				LINC00488	CSNK1E	RP11-6F2.5
				HPSE	LL22NC03-2H8.5	CDC42BPA
				CTD-3239E11.2	WDFY3-AS2	RP11-1079K10.3
				FZD7	KDM7A	KIAA2026
				RP5-1065J22.8	RP11-484L7.2	AC022431.3
				C2orf91	RP11-83B20.1	RP11-339A11.2
				RP11-436D10.3	AC034220.3	RP11-55K22.5
				DNAH6	ITSN1	FAM102A
				AC092798.2	CTB-46B19.2	OTUD4
				AP001476.2	AC073052.1	AGTPBP1
				CYP1B1-AS1	RP11-519M16.1	ALDH1L1
				CTD-2309H9.3	RP11-713N11.4	AC016727.1
				CD209	PDP1	ZNF559-ZNF177
				MYO16	AP000235.3	CTA-373H7.7
				CITED1	RP11-732M18.3	AF196779.1
				AC022498.1	WFDC1	RP11-867G23.3
				STARD9	BTBD7	RP11-308K2.1
				FMOD	CTD-2296D1.5	RP11-572C15.5
				NKX2-5	AC010970.2	RP11-977B10.2
				CHRM3-AS2	ARID4B	RPL7P49
				RP11-168K9.2	AC009158.1	RN7SL498P
				NKPD1	CCDC88C	GJC2
				RCBTB2	GPRC5A	RP11-163E9.2
				RN7SL859P	RBM15	RP11-748C4.1
				TTC7A	AC098828.2	MIR219-1
				RP11-147N17.1	SGTB	OLA1P3
				CTD-2568A17.5	PTPRZ1	MIR3180-4
				COL26A1	RP11-525G13.2	LINC01139
				PPARGC1A	LYST	AC140061.11
				KLHL2	LINC00698	RP11-763B22.4
				HIST1H4B	PABPC1P3	DMTN
				AC114788.2	RP11-608B3.1	AC027612.3
				RP11-395B7.4	RP3-512E2.2	AC011294.3
				RP11-43A14.1	DENND2A	RSBN1
				RP11-317N12.1	ZBTB10	RP3-337H4.9
				RP11-501O2.3	FXR1	RP11-544A12.8
				SFMBT1	SMAD7	SAMD10
				BVES	AKIRIN2	FAM76B
				RP11-616K22.1	GPR98	ZNF347
				EBLN1	HIATL2	ARG2
				LINC01122	PANX1	GNA11
				RTBDN	DMXL1	RP11-82O19.2
				RN7SL846P	TSPYL2	CTB-75G16.1
				NFKBIZ	CDC14A	LHFPL2
				RP11-335E6.2	RN7SL805P	RPL4P5
				AC012442.5	RP11-390D11.1	SLK
				ATP6V0C	KCTD3	RP11-206M11.7
				OXCT1-AS1	SPTLC2	TET2
				RP11-872D17.8	EDA	HMGB1P8
				TMEM210	OPA1-AS1	NOTCH3
				PRR23A	IGSF6	FZD3
				RPS7P11	RP11-288L9.4	AC005618.1
				AC092687.5	SNORA31	AC008060.7
				ARL17B	NXN	RP11-567M16.3
				AC022532.1	RP11-326I11.5	HNRNPA3P12
				BAGE2	RP11-386I23.1	LINC00683
				DCTN1-AS1	RP1-62O9.3	NUP50
				RP11-681L8.1	AC022201.4	C2CD2
				RP11-408H1.3	AP000487.6	AC079250.1
				CALM1	AHR	ZFP1
				CTSW	TCF7	RP4-575N6.5
				RP4-682C21.5	MKLN1	GPCPD1
				TYMP	TPBG	MICA
				RPPH1	AP000758.1	RP11-477E3.2
				NR3C1	CTC-241F20.3	DACH2
				RN7SL1	STXBP4	PNMA6C
				AC096669.3	HYAL4	UBE2V1P1
				RP11-73M18.6	RP11-201O14.1	RP11-82O19.1
				ADAMTS16	SUGT1P3	C2orf69
				PKD1L2	CXorf36	ALG13-AS1
				SETP14	SMURF1	OR13I1P
				AC004017.1	EIF2B5-AS1	AC092415.1
				ERC2	GOLGA4	AC079602.1
				RP11-632C17__A.1	GNPTAB	HDGFP1
				RP11-1102P16.1	ASCC3	SH2D4A
				NUP62CL	RSF1-IT2	HTR5A-AS1
				PDZD9	RP1-225E12.2	MIR1307
				RP1-117O3.2	IER5	CDC20B
				RP3-399J4.4	RP11-7I15.4	CTC-554D6.1
				RP11-65J21.3	RNU2-17P	SLC40A1
				AP000330.8	ZNF969P	PTCSC3
				RP11-132M7.3	AC004878.2	RASA2
				NPM3	RP11-648O15.1	HMGB3P13
				AP001595.1	SETBP1	RNU6-736P
				ZDHHC15	ISG15	LINC00605
				CRABP2	RN7SL237P	DYNAP
				AUNIP	CTNNB1	MAP3K15
				CTB-47B11.3	EPC1	PAPSS2
				RP11-526A4.1	RBM27	CACNB3
				DMBT1P1	GPR3	AC104809.4
				DLG5	ICAM5	CNFN
				RP11-629G13.1	OAT	UBL5P4
				RPL13P12	TYW1B	RIMKLA
				RNU2-14P	PIGHP1	LPAR4
				GPR125	RP11-982M15.8	KBTBD11-OT1
				RP11-685M7.5	TNKS	RP5-1160K1.6
				GPR112	TRPS1	HMBOX1
				RP11-108O10.2	MUC4	LRRC10
				FMN1	KRT15	SDK1
				RP13-259N13.2	RP11-690I21.1	PNMA6A
				SLC35D1	LINC00936	OR7E94P
				MPP7	RP11-23E10.4	U62631.5
				PRRG3	NIPAL1	YBX1P2
				RPL3P4	RP5-850O15.3	OFD1P17
				PLD1	TMEM78	RNU4-47P
				BCL2L11	HERC6	HIST1H2AE
				AC007386.2	HMOX1	RP11-798G7.7
				PTCHD1	C12orf49	CTD-2213F21.2
				RN7SL131P	AC010884.2	RP6-91H8.5
				KCNE1	RP5-1107A17.4	RP11-421L10.1
				CTC-441N14.2	KCNH3	AL512635.1
				MAPK8	REV3L	PIBF1
				SRPK2	TNIP3	RP11-349G13.1
				RP11-69L16.4	SLC22A20	CTC-492K19.4
				ESYT3	RN7SL163P	PER1
				RP11-196G11.2	RN7SL235P	TOPORS
				RN7SL791P	EAF1-AS1	RP11-1348G14.4
				CTD-2369P2.4	RP3-468B3.2	STEAP2
				RN7SL655P	TRAPPC10	STEAP4
				PTK7	C10orf76	VSX1
				TAPT1	HIPK1	RC3H2
				RP11-579D7.4	LUZP1	RP11-277A4.4
				ARL15	RP11-379C10.1	LINC00937
				IGSF1	KMT2C	ARRB1
				IL1R1	UHRF2	BX255923.1
				AL031663.2	TGFBR3L	JAK2
				SPDYE2B	PATE4	TRMT11
				C10orf67	ZMAT3	RP11-20I20.4
				MXRA7	RP11-864N7.2	EIF4BP7
				MPP6	LCN15	RP11-214N15.5
				RP11-845C23.2	CACNA1D	CTB-58E17.3
				LRRC4B	ARPC3P1	RP11-525E9.1
				AC139426.2	CD300E	PAGE4
				SNED1	ACVR1B	BRWD1-IT2
				AC012358.7	TBC1D30	IFI44
				FAM26E	LINC00692	ANKRD20A18P
				RP11-159D12.10	KMT2E	CTD-2623N2.11
				PMAIP1	TACC1	PROC
				FLNB-AS1	ANKRD10-IT1	CYP27C1
				AC005077.12	RP11-219B17.1	AC027348.1
				RPS4XP5	DIDO1	MTND2P28
				RP11-408O19.5	RP11-449L23.2	HIST1H2AD
				GRB2	RP11-23J9.5	RP11-515O17.3
				RP11-760N9.1	PRRC2B	CCDC120
				HSP90AB2P	AL031005.1	AP000962.2
				LINC01037	POMT2	RPS23P8
				CTD-2383M3.1	SGK1	SHANK2
				C1orf116	MILR1	C3AR1
				PPP1R9A	FOSL1	ARHGAP15
				MROH5	SPOPL	RP11-1144P22.1
				CLDN7	RP11-902B17.1	IL18BP
				RP11-196E1.3	BCLAF1	ZNF716
				VCX3A	MPP5	PDE11A
				IFRD1	IRF2BPL	L1TD1
				RP11-374M1.2	CDKN1A	FAM118A
				PRUNE2	TBX1	RP3-325F22.5
				POU3F3	ADAMTS17	CSNK1G1
				RP11-123O10.4	BICD2	RP11-484O2.1
				ST7-AS1	CD3G	AC140481.2
				EFCAB5	RP11-428K3.1	RP11-108M9.2
				CTD-2382E5.1	PI4KA	RP11-526I2.1
				AC016739.2	HIC2	CHRM5
				ZNF652	RP11-96C23.5	RP11-50B3.4
				GS1-259H13.2	ZNF296	HSPA5
				GLUD1P2	RN7SL813P	KB-1615E4.2
				PTBP2	RGMB	RP4-747G18.5
				RP11-123C21.2	GRB14	RP11-274B21.3
				A1BG	UBXN7	MIPEPP3
				RP11-22H5.2	RP11-390F4.8	SLC7A9
				RP11-894P9.1	RP5-859M6.1	RP11-519G16.3
				SLC2A1-AS1	AC007391.2	RNF182
				RNF144A-AS1	TAF5L	HMGB1P14
				DNAH5	RP11-325O24.5	DMD
				FLNB	SPATA5	SECISBP2L
				RP11-323J4.1	PDLIM5	DNAI1
				UNC119	F12	RP11-355B11.2
				RP1-209A6.1	ABCC2	TIMM23B
				LINC00596	SMIM13	RP11-147L13.8
				IFT27	RP11-713M15.1	OTX2-AS1
				HNRNPA1P49	RP11-87H9.3	HIST1H2BJ
				CTB-118N6.2	NMD3	RP11-814P5.1
				NPM1P27	ABCC3	ZNF519
				RP11-1212A22.1	RP3-467K16.4	HIST1H2AC
				SHE	EFNB1	MIR3689D2
				AL583828.1	PDZD8	RAB4B-EGLN2
				MECOM	FOXP1	RP11-159G9.5
				MYCNOS	RNF11	RHCE
				VCX	KB-1254G8.1	CDC5L
				RGL1	ARMC8	RP11-100G15.4
				CTD-2235C13.1	GVQW1	SORT1
				SLC37A3	GPR179	GNB4
				C6orf165	SUCO	RP5-1069C8.2
				MFSD5	SLFN12L	NOS2P3
				GRIA3	PRDM1	BACH1-IT1
				MID1IP1	FCHO2	OR2I1P
				SPERT	NKAPP1	G2E3
				ZNF592	MB21D2	AL583842.2
				RP11-168J19.2	KRT8P33	GPR126
				COMMD3	RP11-709B3.2	RP11-166D18.1
				RUNX1T1	CA2	ZNF699
				RP11-58E21.3	TVP23C	MBIP
				PLCL1	KLHL18	HOXC6
				RP11-189E14.4	PVRL4	RP11-403B2.7
				CELF4	RP11-932O9.10	AC091878.1
				GABRQ	IGF1R	EEF1A1P13
				USP45	PGGT1B	TM9SF1
				RP11-486O13.2	RP11-178L8.3	TPH2
				RP11-709D24.5	SCRG1	CTD-2147F2.1
				ITIH1	SLC16A1	RP11-30L15.4
				VN1R2	BAMBI	TTC9
				RP3-465N24.6	MLLT4	GOLGA6L4
				IGLC1	NBEAL1	RP5-1159O4.2
				HIVEP2	BTG1	C2orf54
				RP1-228P16.1	CENPC	CXCL12
				CTD-3214H19.4	ABHD17AP2	CTC-444N24.6
				MAD1L1	RP11-530C5.1	AC093388.3
				KLHL6-AS1	POLR2A	MRGPRX3
				CAMTA1	LMTK2	DUSP14
				PTMAP5	PPM1A	SCARNA22
				SGPL1	PVT1	KIAA1462
				MRPL37P1	RN7SKP230	LDHAL6CP
				RP11-25H12.1	CEBPG	CHDH
				BEX2	LA16c-429E7.1	AL031666.2
				BIRC3	NEDD4L	CTC-471J1.8
				RPL10AP6	EGR2	SMAD9
				FAM103A2P	TMEM236	ST8SIA6
				ADIPOQ	SRRT	SLITRK2
				ZBED6	KCNQ5	SULT2A1
				RP11-404E16.1	RP5-973N23.4	RP11-199F11.2
				RIPK2	ADNP2	RP11-96B5.3
				TYW1	TNRC6B	PRRT4
				CTB-12O2.1	TSPAN14	C10orf82
				RP11-546O6.4	ANKRD10	RP11-848P1.2
				RP3-426I6.2	AP006216.11	AC008592.4
				RTN4	GP6	FAM228B
				LYRM9	HBEGF	SNX18P16
				SHH	AP001429.1	RP11-379F4.7
				RP4-536B24.4	STARD4	IGFBP2
				RP11-474P12.3	ERO1LB	CDC27P1
				KRT17	ZNF483	AC110619.2
				TRIM2	RP11-57C13.3	RDH8
				LINC00032	VWA8	CTC-550B14.8
				RP11-1399P15.1	CYTH3	DZIP1
				EAF1	GS1-393G12.13	AL139819.1
				IGHVII-20-1	HTR5BP	RP11-301O19.1
				IGHJ3P	TAB2	FRMPD1
				ELOVL3	RP11-77K12.1	PSD4
				FGFR2	KCTD6	RP1-86C11.7
				SUGCT	ADAT3	RP11-211N11.5
				AC079354.5	TMEM185A	PDIA2
				PDLIM2	INPP5A	RP11-33B1.3
				AF064858.8	SPESP1	CTD-3006G17.2
				RP11-464D20.2	DNAH11	RASGRP4
				AC009965.2	IGKC	RP11-305O6.3
				ANKRD24	MKRN1	AC156455.1
				GOLGA8F	TTLL7-IT1	MYOZ3
				RP11-715J22.3	TRIO	B3GNT6
				RP6-191P20.4	FASTKD5	TSSK5P1
				C7orf63	C16orf87	FOXP1-AS1
				VN1R96P	FRG2	DAB2
				FOXJ3	RLF	TRAT1
				GALNT7	PCGF5	RP11-23E10.3
				RP11-165P7.1	FAM117B	TMEM56
				AC010900.2	RP11-262H14.5	PDE1B
				CASC15	ENPP4	RP11-1391J7.1
				CDK17	SNORA74	RP1-319M7.2
				RP11-108B14.5	SEC24A	CTD-2325M2.1
				SERPINB9	AC104820.2	RP11-701P16.5
				AC097467.2	MED26	PIWIL3
				ALDH9A1	CTC-542B22.2	LTA
				S100P	TUBB4B	MARCO
				AC074212.3	RP11-637O19.3	GNG3
				RP11-36B6.1	ST7	RP11-96D1.9
				GDF15	ANKRD11	RILPL1
				DDX60L	MIRLET7D	KCNJ13
				KRTAP16-1	LYST-AS1	RWDD4P1
				RP11-303E16.7	GLCE	SPTB
				AC073283.4	C6orf226	AL035422.1
				FBXO31	RP1-261G23.7	PHKA1-AS1
				ST6GALNAC2	EBLN2	RP11-133K1.6
				PCNX	RP11-515O17.2	RASSF6
				RP11-697E22.1	RN7SL247P	RC3H1-IT1
				RP11-677M14.7	RIPPLY3	LA16c-380H5.5
				NAP1L3	AC090571.1	C8orf31
				HFE	FGFR1OP2	DENND5A
				AC009303.3	RNU11	RP11-6J24.6
				TANC1	RP11-102N12.3	HIVEP3
				CCL28	PDS5A	CDH18
				PRSS1	ULK4P3	RP11-498C9.17
				AC008067.2	CTC-454I21.3	CTB-133G6.1
				GAGE12H	PDXP	RP4-792G4.2
				SELM	WDFY3	CTD-2561J22.5
				TJP1	XXbac-BPG308K3.5	RP11-304L19.12
				SNN	UGGT2	CTA-363E19.2
				IGLC5	YTHDF3	LINC00276
				LINC00102	CNNM2	RP11-356C4.5
				RP11-458F8.2	WARS2-IT1	AC108868.5
				H2AFX	NOP56	PTGDR2
				HIST1H2AK	FOXO1	NPSR1-AS1
				USP47	RASGEF1B	AC083760.1
				FAM138D	SLC22A25	LIN7A
				MGLL	RP11-453N18.1	GRID2IP
				SH3GL3	ING1	ANG
				RP11-53B2.3	RP11-464F9.1	TBX4
				SEC23A	DYRK1A	AMY1A
				SLC4A4	CSRNP1	FNTB
				OAZ1	NLGN1	NR5A2
				MIR4767	MAP3K2	AC015969.3
				ATPAF2	RP11-57H12.3	ATOH1
				DRD4	UBE2C	CXorf49B
				ADSSL1	SNX16	CXorf49
				AP000936.1	RP11-391M20.1	RP11-430N14.4
				ARC	CTD-2251F13.1	PTPRJ
				MT-TV	ADCY2	GPR37
				KANSL2	RP11-805L22.2	AC046143.3
				Z83826.1	RP11-544A12.4	RP11-115J23.1
				CCSAP	AL590431.1	MTRNR2L4
				RP13-452N2.1	RP11-58H15.1	RP11-586D19.1
				OSBP2	LARS2-AS1	SDC4
				GRAMD4P7	ZFX-AS1	AC125387.1
				AP000936.2	FAM102B	RP11-422J15.1
				EIF4A1P10	KSR1	CLLU1
				RP11-134P9.3	POLR2J2	RP11-385J1.2
				NEUROD1	CEP76	RP11-553L6.2
				RP11-141M3.5	DPY19L1	RN7SL33P
				AC104695.3	RP11-362F19.2	RN7SL522P
				OSM	DNM3	RP11-434H14.1
				RP11-112L7.1	MCOLN3	MAGEA10
				PRSS8	RN7SL121P	CCDC144CP
				RP11-442N1.2	RP11-245J9.4	WHAMMP2
				RP11-438H8.8	SNORA70	PTGS2
				RP11-327F22.4	NAPB	AL645730.2
				RP11-462G2.1	BZRAP1	HSD17B7P2
				MAP2K1	ABCC5	PTMAP2
				IL23A	AC017006.3	RP11-2E17.2
				KCNQ5-IT1	NAA16	EXTL3-AS1
				FTL	RHEB	SOX9-AS1
				RP11-379I19.3	MON2	DDAH2
				CLTCL1	AL591516.2	RN7SL575P
				RPLP0P2	TMEM201	snR65
				PKD2L2	CA14	NCMAP
				HMGCS1	AC139100.3	SPRED3
				UBQLN1	AC099522.1	UBE2SP1
				PDK1	CDYL2	RP11-1018N14.5
				SNORA75	CNKSR2	TAS2R19
				EPHA3	SPTY2D1	RP11-401O9.3
				BAI3	RNU6-1157P	RN7SL198P
				AC006116.17	PRR7	AC126614.1
				SLC2A14	MAP4K5	CTC-507E2.2
				LRRC16A	GSK3B	RP11-406H23.2
				LMCD1-AS1	SCARNA12	ZNF257
				ODC1	USP33	CTD-3214H19.6
				COTL1	ATP6V1B2	HIST1H1B
				MIR661	WDPCP	RP4-617C6.1
				SH3BP4	PLEKHH2	RP11-1152H15.1
				SIGLEC15	SNORA2B	NEXN-AS1
				RP11-384C4.3	RP11-640M9.2	LIMCH1
				NPM1P40	UBE2E1-AS1	RP11-876N24.1
				TRIM37	RP11-272L13.4	RP11-196G18.24
				RP11-1103G16.1	ANXA1	TRO
				CTD-3064M3.4	TMEM40	RPL7P50
				RDX	SBNO1	SLC22A31
				CRIM1	AL590483.1	NR2F2
				CXCR4	ATF2	RP11-766F14.2
				C12orf61	ISOC1	SIGIRR
				RP11-4F22.2	CCNT2	RP11-15B17.1
				PDE2A	C5orf30	LMNA
				RN7SL158P	AQP4-AS1	LINC00472
				DPP4	INO80C	RP11-242F24.1
				IL7R	KDM5B	HOPX
				AC034228.7	TMPPE	CTC-451A6.4
				TULP4	RN7SL122P	C6orf132
				ZCCHC11	HIST1H2AM	AC008592.8
				CTA-357J21.1	TOLLIP	SLC12A5
				CTC-573N18.1	CEP152	CX3CR1
				MAFK	PAPOLA	HAMP
				RP11-727F15.9	MTHFD1L	LINC00926
				RP11-496B10.3	AP001469.5	ZNF487
				RP11-353N4.4	SIK3	ZNF26
				CNIH1	LRIG3	ZNF573
				RAD18	MVB12B	WNT9A
				2006-03-01	CTD-2179L22.1	NAMPTL
				SLC29A4	EPHB3	KLRD1
				PHTF2	RP11-669I1.1	RP11-797A18.6
				MCUR1	RNF139	CTGF
				AF127577.8	RP11-989E6.10	RP11-234K24.3
				ABCA5	FOXN2	MIR497HG
				PPFIBP2	ZNF827	SCARNA4
				CYP2T2P	JAG1	C1orf233
				CTD-2587H24.5	PRKAB2	ADORA2A-AS1
				AC079807.2	RP11-646E20.6	TMSB4XP6
				KIAA0368	SESN3	RP1-40E16.9
				BIRC6	TP53BP2	NR1D1
				RP11-1M18.1	SNORA54	RP11-174O3.1
				ATP6V0B	PCGF1	AC010148.1
				RP11-160C18.2	RP1-212P9.2	IGF2BP1
				PTPRO	SNORA60	HIST2H2BD
				BMPER	MEMO1P1	TCL1A
				CPEB1	TMEM213	CTC-457L16.2
				CTB-33O18.3	SNORA71B	HNRNPA3P11
				CSGALNACT2	RP3-461P17.10	RP11-258F22.1
				RP11-66A2.2	ZFP36L1	CKB
				WASF3	SENP6	CPM
				AC005616.1	RP11-516J2.1	RP11-144G6.12
				KIF13B	LINC01102	PITX2
				FANCC	AL118506.1	ARL13B
				TRPM3	GCNT7	SERPINA10
				ANTXR2	KLHL24	RP11-142A23.1
				PTK6	KATNAL1	ANKRD36BP2
				HES2	RP11-492D6.3	RN7SL81P
				SNORA28	RN7SL815P	CRLF2
				CYP51A1	FOXD2-AS1	UBE2Q2P1
				ATG7	PTAR1	RP11-192P3.4
				ARHGEF10L	ZC3HAV1	MTMR8
				ZNF428	LRCH1	MATK
				ZBTB18	C2orf88	LHCGR
				FAM71D	BRD4	RP4-705D16.3
				AC006487.1	RASSF8	RP11-20I23.7
				RP11-2N5.2	NOTCH2NL	ENSAP2
				NPR3	SNORD53	RP4-592A1.2
				PANK3	C18orf25	RN7SL596P
				KRT18P15	ARMC5	RP11-387D10.3
				AC012594.1	CEP170P1	ETNK2
				UPP1	MYO10	USP37
				LPIN2	VPS13D	EIF2S2P4
				BCL11A	ZFX	RP11-504P24.6
				GOLGA6L9	PRPF39	FLVCR2
				C1QL4	GRHL1	RN7SL278P
				CTB-135N1.2	FAM74A6	CALM2P2
				RN7SL9P	NEK7	RP6-65G23.1
				TAF4	MIR205HG	RN7SL523P
				FCGRT	DCAF13P3	RP13-578N3.3
				TMSB15A	AC016722.3	AC006116.20
				UHRF1BP1L	PHC3	RP11-45F15.1
				CORT	ARPP19	CERS4
				VPREB1	RN7SL442P	RP11-346D14.1
				LINC01004	AL162389.1	RASGRP2
				EMBP1	CREBBP	CTD-3049M7.1
				POGZ	CHIC2	RP13-516M14.1
				CTC-523E23.11	FNIP2	AC013472.3
				SCIN	SLC9A9	RN7SL731P
				RNU4-2	MTUS1	AL022341.1
				RP11-403P17.3	RP11-366H4.3	IGFL2
				RUFY2	CELA3B	PBRM1
				RP11-161H23.9	C1orf63	FOSL2
				TTPA	MIDN	AP006216.10
				SFMBT2	PNMA1	CHP2
				RP11-357C3.3	AP000477.3	TESPA1
				RP11-3K24.1	ZC2HC1B	C4orf47
				RP11-356C4.3	RP4-723E3.1	SH3GL2
				RP11-449G16.1	TNFAIP8L3	ZNF723
				BZW2	FFAR2	CYP2B6
				MKRN2	FBXO33	RP11-613M5.2
				RP5-1050D4.4	CCSER2	RP11-149I23.3
				TNNT1	PHF3	CTD-2162K18.3
				HES1	AC004878.8	RP11-634H22.1
				MTRNR2L9	EVI5	AL513344.1
				LINC01134	SLCO5A1	ZNF829
				STRC	KCNQ5-AS1	PTPRR
				SLIT3	CD7	RP11-325E14.5
				SCUBE2	RP11-304L19.4	PTRF
				PDE6A	DOT1L	RP11-140K17.3
				SOCS1	RP11-434H6.6	UXT-AS1
				KCNN2	XPO6	RP11-1157N2__B.2
				CT64	AREG	ARHGAP20
				ITPR1	RPL41P2	CTD-2194F12.1
				MEFV	ZEB1	RP11-776A13.1
				CTD-2620I22.3	C1orf158	TOLLIP-AS1
				SSTR3	HCG9P5	PLEKHA1
				PARD3-AS1	RP11-383J24.6	RP11-368L12.1
				SAMD12	RP11-312B8.1	DOCK4
				RNA5SP268	STX3	IRX4
				CDC42EP3	FAM126A	CSRP2
				RP11-466F5.10	AC110926.4	RP11-157B13.7
				ABI1	GAB2	CNTD2
				Z99756.1	ZNRF2P1	RP11-136H19.1
				PLXNB3	AGBL3	EPHA10
				SYTL4	CDH6	RP11-613F22.5
				SMURF2	RYBP	RP11-449L23.3
				RP4-616B8.4	AC004053.1	SPOCK1
				TTLL5	RP11-815J21.1	RP5-884G6.2
				CTD-2651B20.1	MTMR9	LCN12
				CCND2	TWISTNB	RN7SL317P
				GPR37L1	GJA1	AP006222.2
				HCG20	NUAK2	LINC00652
				ME1	LUC7L3	AC004878.7
				PARD3	PPM1L	SIRPB1
				UBP1	RP11-473D24.1	SGCD
				RP11-112J3.15	FAM126B	RP11-513O17.2
				AP000705.7	RP11-626G11.1	RP11-30K9.4
				MAST4	CTCFL	C21orf62
				DENND1A	OTUD3	RP11-181C3.1
				MIR7-3HG	SNORA79	HNRNPA1P59
				AC009305.2	PCNA	SNORD14E
				LAPTM4A	ANKHD1	MT-TF
				TRANK1	LINC00974	ESR1
				KB-1410C5.2	RP11-474N24.6	OPHN1
				RIN3	RP11-583F2.5	RP11-356K23.2
				SCAPER	PRDM2	F2RL1
				SC22CB-1E7.1	SLC52A3	CTD-2165H16.4
				RAX2	AL353791.1	RP11-624L4.1
				RANBP9	PRKCA	PTK2
				RP11-1109M24.12	SPRY2	MIR590
				IGLL1	DLGAP1-AS2	C20orf112
				RP11-430L17.1	SRP72P2	RP11-613M10.8
				FTLP10	RP4-545C24.1	RP11-369G6.3
				RP11-694D5.1	ATL3	LRRIQ1
				KCNMA1	DPRXP4	RP11-286H15.1
				CRX	H1FX	CA11
				CNDP1	CASK	DUSP10
				AC099796.1	C11orf30	CCDC24
				PI4KAP2	USP15	UMODL1
				RP11-18B3.3	NR2C2	GRM6
				MED14-AS1	BEST3	SHISA3
				CTA-992D9.6	PNPLA8	RP11-8L2.1
				MAFF	DCUN1D3	SAG
				RN7SL651P	IL18	RP11-578F21.12
				FBXO24	C17orf105	IL8
				KCNS3	HIST1H1C	COG3
				KIAA0247	RP11-183M13.1	AD000091.2
				CDC42BPB	C8orf34	AC083949.1
				AC002398.12	SPAG9	ZNF83
				RP11-22C11.1	CBLB	AGPAT4
				HCG4B	RN7SL696P	LA16c-431H6.6
				GNPTG	RP11-539G18.2	MS4A4E
				RP11-556K13.1	DENND1B	FGD6
				HUNK	AC079210.1	AP001187.1
				IGLC2	RP11-267J23.1	RP11-143M1.2
				BTG3	PRKAR2B	CDKL2
				ALOX5	KLF2P4	ZYG11A
				RP13-192B19.2	TCEB3	SNORD15A
				RP5-1073F15.1	C15orf52	IKZF2
				VLDLR	MTA2	HERC2P5
				SOAT1	AKAP1	MYO3B
				LINC00269	RPRD1A	MUC15
				RP11-843A23.1	RP11-275I14.4	ADRBK2
				PCDHGB6	NUP210L	RP11-212D19.4
				MAN1A2	SERINC5	RPL21P3
				MT-TQ	VGLL3	HS3ST5
				CTB-186H2.3	HSPA6	C6orf123
				TLR3	RP11-398G24.2	DBH-AS1
				SIPA1L1	AGFG1	TPRG1
				COPRS	LINC00970	HAND2-AS1
				SNX1	KLRC1	ABCA8
				RN7SKP181	RP11-288K12.1	AC073218.2
				RP11-89M16.1	RN7SL405P	IGFBP4
				RANP1	DICER1	RP11-203B9.4
				STMN3	RAB11FIP1	RP4-803A2.1
				FKBP1AP2	PEAK1	RP11-536C10.3
				SLC1A2	PPFIBP1	RP11-242F4.2
				AL122127.25	SATB2-AS1	IGSF11
				TMSB4XP8	VEGFA	RP11-506H20.1
				UTRN	DNAJB6	PCDH1
				OSBPL3	KAT6A	RP11-345P4.9
				MLK4	LINC00461	RP11-181G12.2
				CHKA	SFT2D2	HTRA4
				CCDC144A	SUGT1	SOX13
				RP11-110G21.2	CTD-2050E21.1	RP11-798M19.3
				GDI1	AC007875.2	RP11-63C8.1
				SNORA37	METAP1	RP11-534L20.4
				LINC01160	AKAP17A	DCAF12L2
				MAPK8IP2	RP11-186N15.3	SEPT7P9
				WDR74	CCNY	RP11-24C3.2
				RP11-401A10.2	FAM13B	GLDN
				RPL21P122	CAMK1D	RP11-484D2.4
				TUBA1A	SH3RF3-AS1	LRP1
				IPO7	TAOK1	GBGT1
				CPLX3	REPS1	AC097461.4
				CTNNA1	SIN3A	ERBB4
				RPL41P1	TLK1	TRAPPC3L
				RN7SL740P	TPST1	VENTXP4
				TPO	HNRNPH1	LILRA2
				AC092431.3	AC009060.1	AC008394.1
				CTA-268H5.12	CCDC132	RP11-727A23.1
				PTCH1	RP11-135A24.2	RNF113B
				RNA5SP160	WTAP	ERBB3
				GRIK4	ARGLU1	SLC28A2
				CD109	SLC35E4	AC007040.11
				KHSRP	RP1-76C18.1	NDE1P2
				RPL35P1	SNORA74A	SNORA66
				HEPACAM	CAPZA2	CROT
				KSR2	MEF2A	CTC-425F1.2
				PINLYP	NUDT10	CCDC64B
				RPL35AP30	KRT18P63	RP11-702L6.4
				CTC-436P18.3	CDK2AP2	LINC00632
				APOF	KALRN	RP11-592B15.3
				RP11-484L7.1	DMRT1	RP11-682N22.1
				CPEB4	RP11-83A16.1	EEF1A1P9
				USP13	RP11-204C16.4	RP11-528I4.2
				FBXL6	RN7SL96P	RP11-677I18.3
				SLC28A3	DPYSL5	RP11-43F13.4
				NEAT1	AKAP8L	RP11-347I19.8
				TMEM163	TGFBR1	LINC00535
				AC079610.2	CRKL	AC012360.6
				RP11-85G21.1	KNOP1P4	RP3-339A18.6
				RP11-343H5.4	PIAS2	PNOC
				RN7SL783P	AC004019.13	BAALC
				TAT	ACTB	PRKAA2
				PBLD	GPR18	HIST1H4J
				C19orf35	ALKBH5	TMPRSS4-AS1
				SKINTL	SLC26A4-AS1	FRS2
				RP5-855F16.1	CXXC1	AP002387.1
				PTPRM	SOGA2	PCDHA13
				AC015815.1	KIAA1467	ACACB
				PRNP	ANKRD20A4	SHANK2-AS1
				PTPLAD1	PRPF18	MIR103A2
				VSTM4	NMB	RP11-382D8.5
				FAM20B	HEY1	RGPD2
				PDGFB	RP11-66N11.8	RP11-666A20.4
				PTPRG-AS1	EZH2	AL365202.1
				IGF2R	OSBPL8	ZNF467
				RP11-22P6.2	AC009695.1	MIR548D1
				RP11-649E7.7	FAM105B	RP11-794M8.1
				RP4-694A7.4	CNOT4	ULK2
				STRN4	AC125232.1	RP11-51J9.5
				RP11-383J24.1	DOCK7	RP1-274L7.1
				XXyac-YX155B6.5	HEG1	LCA10
				FBLN7	RP11-259O2.3	ZSCAN4
				BTNL10	NUDT4	ENTPD8
				ZFAND4	TRIM28	RNU6-1289P
				UXS1	CTC-525D6.1	RP11-617J18.1
				AC104135.2	HIF1A	AC009499.1
				HTR3C	AKAP13	AC012358.8
				CTB-77H17.1	CDC40	RPSAP14
				DDHD1	PLEKHF2	RP11-1114A5.4
				KCNB1	IGFL4	RP11-378J18.3
				XXbac-B33L19.3	DCP2	C1orf145
				PHYHD1	SNAPC2	RP11-472I20.1
				CARM1P1	MYLIP	RP11-809N15.3
				CMC2	HIST2H2AB	NTRK3
				2005-03-01	AC084809.2	RP11-662M24.1
				PITX1	GSG1L	AC114730.11
				ACTG1P10	RP11-1090M7.1	BIRC6-AS1
				KAL1	DCTN4	CTD-2340D6.2
				RP11-52B19.10	TASP1	HIST1H4D
				MRPS18AP1	SLC30A3	HOXA5
				RN7SL441P	OTUD1	SLITRK4
				UBE2F	SACS	KCND2
				HMGB1P39	RPL21P28	NFIA
				RP11-958N24.1	NT5DC3	SLC35E1P1
				RP11-424N24.2	RP11-1079K10.5	RP11-290F20.3
				CDK2AP1	CTD-3032J10.3	RPL7AP65
				RASAL2	ANKRD36B	AC010761.14
				AC009227.2	CTD-3236F5.1	PTGES
				ZNF264	CD163	ADH6
				C1QTNF9B-AS1	AL353662.3	NUAK1
				CAMSAP1	UBE2Q2L	RP11-164H13.1
				NANOG	HIST1H3F	LINC00668
				ATP1A1	STX19	TMEM132D
				GPR85	RP11-535C21.3	CASP14
				RPL41	RP13-650J16.1	AC093415.2
				SEMA3G	RP11-152L7.2	AC087430.1
				PDXK	SETD2	C1QTNF2
				CDCA7	AF131216.6	AC011753.5
				GARNL3	RP11-20B24.6	COL28A1
				DDHD2	SMG1P1	RN7SL871P
				RN7SL236P	DYNLL2	RP11-274J7.2
				RPL12P1	RP11-153M7.3	MIR550A1
				PSPC1	DNAJC3	DDAH1
				BBX	RNF168	GPR64
				AC006115.3	AL928768.3	snoU109
				TC2N	SLC35G1	RP11-713N11.3
				CD164	ACTG1	CTC-281M20.1
				TBX10	KRT8	FTCD
				LGR4	PARVA	CD274
				CLIC5	BRMS1L	DOK2
				RAF1	DNAJC27	FREM2
				MSX2	RPL13P4	RP11-401N16.1
				COL2A1	MORF4L1	XKR5
				IL1RAP	BHMT	DFNB31
				RP11-50D9.1	MGA	ABCG2
				PCDHA3	RP11-737O24.3	AL021546.6
				KIAA1109	CLDN12	RP11-392E22.11
				KRT14	RN7SL754P	DUSP5P1
				RN7SL264P	BAG4	PRKY
				RP11-529J17.3	RP13-631K18.2	AC021224.1
				CSPG4P11	RBM39	POU5F1B
				RP11-342K6.4	RP11-308B16.2	SEMA6B
				MRPL54	RNU4-32P	HIST1H2BM
				OXCT2P1	GDAP2	RP11-708J19.1
				LINC00327	NAA25	OTUD7A
				L2HGDH	SFXN1	BX470102.3
				RN7SL670P	HIST2H2AC	CTD-2315E11.1
				RP11-337N6.2	PKD1L3	PAK3
				CSAG4	TPT1P13	VAC14-AS1
				BNIP3L	CYB5R4	ATP8A1
				C5orf42	AC078883.3	MYLK3
				AC010297.1	FNBP1L	CTD-2314B22.1
				FAM83E	RP11-506M13.3	FAM151B
				PHBP13	UBE2D1	NXNL2
				RN7SL676P	RPS15AP1	TMEM130
				MTND5P6	RP11-205M20.7	SNORD94
				AE000660.4	SMCHD1	GAL3ST1
				HNRNPA1P29	RP11-300M24.1	MPZL2
				TIMP4	EGFR-AS1	ACOT11
				RP5-827C21.4	SNORA53	RP11-3N2.13
				RP11-95O2.5	FBXO11	DNAJC27-AS1
				NLGN2	TMEM87A	RP11-245J9.5
				LRRC19	RP11-486G15.2	RP11-321L2.2
				DERL1	LINC00478	MASP1
				PTPN2	HSPA8	AC068896.1
				TM2D3	ASXL1	RP11-692C24.2
				RRAS2	ZNF295-AS1	THSD7B
				RP11-747D18.1	RP11-680G24.4	RP11-820K3.3
				RP11-391M7.3	ANGPTL7	RP4-753M9.1
				EIF1	ATP9B	SH3GL1P1
				RNU6-1	CWF19L2	ARID2
				RNU6-4P	UBE2Q2	LRG1
				RNU6-5P	CDC73	RP11-87N24.2
				RNU6-3P	ADRM1	CNTN5
				RNU6-2	SRRM1	FAM179B
				RNU6-9	CARKD	PACRG
				RNU6-6P	RGPD5	TAC4
				NAPG	NET1	RP11-443A13.5
				RP11-14N9.2	DNMBP-AS1	CTC-523E23.5
				RPS26P8	SPATA17	RP11-171I2.5
				CAMK2G	RP11-99J16__A.2	ZNF569
				AZIN1	AC097382.5	GYG2P1
				CCDC162P	RP11-296K13.4	HIST1H2AI
				RP11-395L14.17	HNRNPU	RP11-271C24.2
				C9orf106	PRKRIR	RP11-114G22.1
				RP11-448G4.2	AC006978.6	FAM46B
				CTD-2130O13.1	USP3	RP11-498D10.5
				CTC-499B15.6	FTH1P3	RP11-1020A11.1
				TMUB1	RP11-219B4.3	RP13-585F24.1
				RRAD	LINC00035	SLC4A11
				KLF12	TMEM64	RP11-372E1.6
				SMPDL3A	PLXDC1	LPO
				UBE3D	AL136115.1	ZFP91-CNTF
				AC004453.8	ZBTB8B	SP7
				DGAT1	AC111200.2	LINC00993
				XAGE1B	RP11-333E13.2	HIST1H2BI
				CTC-1337H24.2	RP4-657D16.6	FAM63B
				MEIS2	MAPRE2	AC068499.10
				RP11-397A16.1	DENND5B	RP11-760D2.5
				PLXNA3	TAGLN2P1	AC011288.2
				ATOH8	RCL1	SPOCD1
				FTH1	LINC00670	AC096649.2
				RP11-473P24.2	C6ORF165	CTB-99A3.1
				EDN2	GAPDH	RP11-329J18.3
				ZNF300P1	SNORD59A	AC005276.1
				LINC01036	RP11-549J18.1	RP3-430N8.11
				RP11-333I13.1	ATAD2B	RP11-204N11.2
				RP11-756J15.3	GPR173	RP11-523O18.5
				PIKFYVE	ZNF542	PROM2
				PRELID2	SYDE2	RP11-147L13.2
				RP11-312O7.2	ZBTB11	U1
				CTC-559E9.10	CCDC93	CNTNAP3B
				CTB-92J24.3	RN7SL515P	RASL11B
				RP11-75C9.1	TBCC	OLR1
				CTC-325H20.4	RBBP6	FBXW7
				AC027269.2	PON3	BMS1P4
				PROX1-AS1	PNISR	GRID1
				ZNF738	LIN7C	RP11-540K16.1
				RP11-544D21.2	TMEM9B	SVOP
				RP11-449P1.1	AC139100.2	C10orf11
				ARHGAP17	FAM186A	CTD-2161E19.1
				RN7SL187P	AFF4	CTC-575D19.1
				CTD-2319I12.2	EPG5	GRIN2D
				RP11-73E6.2	RBM18	RN7SL505P
				ING3	CTD-2313J23.1	MIR143HG
				RP3-441A12.1	PROX1	COL7A1
				NCOR1	PTMA	AC012454.4
				AC007679.3	UBE2Q2P2	RN7SL790P
				MMP9	IBA57	LINC00664
				STAT4	RP11-73K9.2	ATP1A4
				P4HA2	MYO1D	LA16c-385E7.1
				CTSV	RP4-778K6.3	PHLDB1
				MIXL1	LINC00843	AL132989.1
				U2AF1L4	DEDD2	RASEF
				TMEM191A	AP001597.1	AP001065.2
				KIF26B	RP11-91P17.1	MTATP6P1
				SRRM2	RP11-32B5.1	INMT-FAM188B
				PLEKHH1	RAB8B	UCA1
				OTOGL	SUMO4	GAS5-AS1
				ITSN2	AC090186.1	RN7SL597P
				AC083822.2	ZBTB1	RP11-314O13.1
				DYNC1LI1	PGAP1	RN7SL477P
				MRPL41	SNHG1	DOC2A
				LRRFIP2	AC007126.1	HERC5
				RP11-366F6.2	RP3-323N1.2	AL139147.1
				USP43	RALGAPB	LINC01013
				RP11-384M15.3	RP11-473M20.9	RN7SL540P
				FXYD2	ZFR2	LGALS9
				MPZ	LINC00685	EEF1A1P12
				HMGA1	GTDC1	TEX41
				RP11-57A19.4	MYCBP2-AS1	BGN
				RP11-678G14.2	H2AFV	ASXL3
				PUF60	GAPVD1	RP11-275F13.3
				TRGV2	MYO7B	U47924.31
				ZNF430	MANBA	RP11-473M20.16
				AP003900.6	ATF7IP	RP11-192P3.5
				AC002550.5	LINC00338	AC084082.3
				SCAND3P1	CCDC129	LOXL1-AS1
				RP11-420K14.3	AC000367.1	SYT5
				SDHAP1	C6orf25	NAALADL1
				AC124789.1	EPPIN	MYO1F
				PLEKHB2	BAG3	ZNF888
				ANKRD55	PUM1	ZNF346-IT1
				RP11-496D24.2	PPAT	PLXND1
				ARSD-AS1	TRMT112	RP11-395P17.11
				RP11-466C23.4	MAGI1	METRNL
				METTL17	RP11-193H22.2	NCBP2-AS1
				MTMR12	SLC14A1	AC007743.1
				CTD-3185P2.2	ATP11B	CTB-31O20.8
				PRDM14	LRP1B	ZNF8
				PTPN4	BCL7C	RP11-525J21.1
				NDST1	RNY4P10	SPP2
				CORO7	CTD-3025N20.2	AC005037.2
				ZNF610	MYCN	ASB18
				UCHL1-AS1	VAMP2	AC037459.4
				KHDRBS2	RP11-359E10.1	SERPINB10
				CRTC3	RP11-44N11.1	AC104389.28
				BLCAP	LINC01024	SLC39A12-AS1
				RPS17	CELF1	ANKS1B
				DNLZ	TUFT1	LPPR3
				EIF5A2	RP11-25D3.1	SLA2
				SSSCA1-AS1	RP11-326K13.4	MIR744
				SNX8	RP11-536L3.4	RAB3IL1
				SLC6A12	RHOF	ZIK1P1
				C4orf40	C9orf172	RP11-671J11.7
				U2AF2	LYSMD2	DLGAP1
				RN7SL481P	RP11-403A21.2	RP11-11N7.4
				TRPC3	RP11-573D15.9	ZNF69
				GHRH	SNX5	ENC1
				CABIN1	SCO2	AC073046.25
				CTD-2630F21.1	KLHL28	RN7SL402P
				KCNJ2	MSH4	PDE6B
				RP11-214K3.21	G3BP2	FGFR1
				LINC00483	CDK14	ACE
				CTA-268H5.14	MIR4642	LFNG
				C12orf40	UBXN2B	SNORA12
				COX16	TRIB2	LDHD
				RP11-229P13.2	LINC00113	C8orf82
				FUZ	HSPH1	TMEM119
				AP001816.1	YY1	SIGLEC8
				RP11-476H20.1	LRRC37B	HSPA1B
				NPIPA8	CTD-2340D6.1	SUCLG2P4
				MNX1-AS2	CEP135	RP11-161D15.3
				RP11-126O1.4	CPSF6	C8G
				TNFRSF18	SRFBP1	RP11-439A17.7
				CD300LD	ZZZ3	RP11-121A14.2
				PLD6	NECAP1	AHNAK
				AL023807.1	RP11-366L20.2	RP11-329A14.1
				PIPOX	SCAI	ABCB4
				SSBP3	PRKAA1	KISS1R
				FUNDC2	VPS53	MYH14
				CTD-2544N14.3	NDFIP2	HSPA1A
				C3orf35	LA16c-425C2.1	RP11-597D13.7
				UCK2	PEG10	RP11-1006G14.1
				KLF6	MIER1	CDK5R1
				AC002429.5	RP3-400B16.1	RP5-1120P11.1
				FAM153C	ARL6IP1	SGSM1
				NHLH1	PHACTR2	RP11-379C10.4
				PYURF	TGFBRAP1	HS6ST3
				RP11-187A9.3	ANKRD36C	RP11-171I2.2
				RP11-423H2.1	MEX3C	AC007620.3
				DCN	RP11-830F9.7	RP11-362K2.2
				ZBTB7C	AC092757.1	PELI2
				GPX7	USP4	RP11-510H23.1
				RPL24P2	ZC3H13	TMEM178B
				NMT2	RP11-1407O15.2	TDGF1P5
				KLF2	SNHG15	TSHZ2
				RP11-288I21.1	ZNF407	MROH7
				RPL21	AC018635.1	CTD-2135D7.4
				TBC1D8	CENPU	ZNF331
				CLDN4	AC009120.10	TDRD6
				AC006509.7	CCDC126	SNORA20
				FUCA1	TERF2IP	FABP2
				RP11-347C12.1	RP11-138I18.1	RP3-354N19.3
				H3F3AP4	AKR1C2	AC004528.4
				KLHDC9	AC007308.6	HMGN1P3
				NF1	RN7SL431P	CR769776.1
				MYO5A	NDEL1	RP11-626G11.5
				RP11-463D19.1	CD2AP	ABCA9
				LINC00700	AC124057.5	AP000472.2
				PPTC7	RP11-145G20.1	ASTL
				RPL6P27	CLASP2	RP1-5O6.4
				GALNT13	DR1	SRRM4
				TMEM45B	RN7SL92P	HIST1H2BH
				AK7	PML	LINC01091
				FAM90A25P	SPIN1	MIR106B
				ZNF516	MLLT4-AS1	NEDD9
				MED30	LARGE	VSIG1
				RN7SL571P	KBTBD8	AL354720.1
				SYT10	EPHA6	XXbac-BPG157A10.21
				NANOGP8	AP000462.2	RP11-37N22.1
				GNPDA2	RP11-51J9.4	RP11-758P17.3
				ATP5B	NBPF3	AL901608.1
				C1orf222	AC016712.1	LHFPL5
				PRC1	AL035610.2	CNTF
				AP001619.2	GPD1L	PDGFRB
				ATF4	RP5-1021I20.6	MYEOV
				RAB3C	PBX3	OSR2
				AL117190.3	RP11-602N24.3	RP11-439L8.4
				RP1-310O13.7	RP11-490G8.1	RNU12
				SLC38A11	RP11-87H9.2	RNU6-1054P
				KDM5C-IT1	SNORA67	MIER2
				C1orf195	TET3	RASD1
				PREP	AL590867.1	FOXC1
				RN7SL817P	SENP3-EIF4A1	ZIC2
				RP11-206L10.5	PTMS	RN7SL707P
				RP11-367J11.2	SGK3	LL22NC03-63E9.3
				GABRB2	JADE3	CTLA4
				AC136289.1	RAB1A	FGF9
				XXbac-BPG248L24.12	RP11-1C1.7	HLA-K
				LA16c-329F2.1	RP11-430C1.1	IFITM2
				SMPDL3B	RP11-589P10.7	HIST1H2BG
				FAM92B	GLI3	NRARP
				RP11-772C9.1	LYN	RP11-382A20.5
				TMX4	BMS1P2	FCRL1
				PIGY	FBXL2	ADRB2
				KPNA4	MCPH1	ABHD1
				LGALS4	BCL6	AL928742.1
				HERC2P7	AC134878.1	RP11-336A10.2
				SZRD1	GMFB	LINC00364
				TUSC1	FANCB	HERC2P4
				GCH1	MAPRE1	ZNF846
				MIR378D2	RP11-549L6.3	AJAP1
				KIAA1432	ASB7	RP1-90L6.2
				AC009299.5	KIF5C	RN7SKP195
				AC027320.1	DDX3X	RP11-118B18.1
				PLSCR2	ELMO1	ACSBG1
				RP11-840I19.3	C3	DLX2
				PTGIR	RP11-274B21.2	DMKN
				SNX25	USP24	RP11-677M14.6
				RP5-1166F10.1	RN7SL576P	FGF13-AS1
				RP11-798G7.6	RP11-512M8.3	RP11-178L8.9
				HSF2	MDFIC	RP11-998D10.5
				PTPRD	ARHGAP32	HIST2H3D
				APLP1	RP11-420G6.4	GS1-179L18.1
				NDUFB2	CLDN10	AC007285.6
				RP11-474D1.3	BCL11B	FAM135B
				RP11-13J8.1	TCF12	EGLN3
				TESC	HIST1H2BC	HIST2H2BF
				SOX4	AGPS	ANKRD20A3
				SRGAP2B	EPB41L2	NEUROG2
				RNF216P1	ZNF207	RNU1-60P
				RP11-130C19.3	CTC-232P5.1	HIST1H3C
				COL1A2	CTD-2047H16.4	SAP25
				CTB-131B5.5	CTD-2293H3.1	TAGAP
				RP11-231P20.2	C1orf180	CTD-2199O4.7
				MGAT4A	CCNL1	SCUBE1
				PHF1	HERC4	SLC8A1
				HERC2P3	RP11-545I5.3	SMN2
				HIST3H2A	FATE1	RP6-206I17.1
				TRIM29	RP11-4O1.2	HIST1H3B
				RN7SL15P	ZBED4
				CTB-1I21.1	NBPF1
				PPP1R2	RN7SL686P
				SNURF	FASN
				AAMP	ZBTB17
				RB1CC1	MARCKSL1P2
				AC007395.3	RP11-410N8.3
				2011-09-01	hsa-mir-1199
				CDC42	NSG1
				ZC3H15	KBTBD6
				RP11-783K16.5	RP11-554D14.6
				RTTN	FKSG52
				PTPN13	SNX18
				C3orf17	RND1
				PKD1P1	SCML2
				RAB39A	SREK1
				MUC5AC	PRR7-AS1
				MAZ	AL139821.1
				ILF3	GNA13
				AC017101.10	ZNF124
				SCIMP	RBM12
				EVL	CREB3L2
				SLC10A7	CSNK1G3
				NUDT4P1	CDH24
				CTC-534A2.2	NFIL3
				QPRT	STAM2
				RP1-317E23.6	ARID1B
				AC006129.1	SNORA38
				AL590085.1	MBNL1
				RNU6-1005P	SYNGR3
				LINC01119	SLC22A15
				CRYBB1	RP11-466A19.1
				RP11-744K17.1	RN7SL625P
				CYTH1	AC010468.1
				MTDH	LPCAT2
				PPP2CA	RP11-1260E13.4
				RP11-144L1.8	RP11-313P13.5
				RP11-268G13.1	RP11-661D19.3
				CTSL	COX10
				VAV2	RP11-82L2.1
				RP11-565A3.2	RNASEK-C17orf49
				GRM4	ZNRF2P2
				ACSL1	RN7SL744P
				HECW1	COBLL1
				AC009107.1	ZNF148
				CRNDE	LRFN4
				KLHL15	KLF4
				AC061975.2	BAIAP3
				TMEM123	TMEM200A
				BACE2	RP11-731F5.2
				S100A9	GAS2L3
				CTD-2006K23.1	ST14
				BSG	ELK4
				LA16c-4G1.3	CYP1A2
				ARL5B-AS1	FAM171B
				CTC-543D15.1	ZNF677
				RN7SL165P	SNORA76
				ARID4A	PRPF4B
				HPN	UBR1
				IFNGR1	RN7SL5P
				C11orf95	AC012309.5
				RP11-1070N10.3	KLHL20
				S100A4	RP11-26J3.3
				AP004242.1	RHPN1-AS1
				RORA	MED18
				JARID2	HNF4A-AS1
				SAMD3	VWDE
				RP11-158D2.2	FER
				PTPN14	USP31
				PPP1R15A	GPR146
				ANXA11	ZNF292
				CTGLF12P	UBL3
				RP11-343J3.2	CTD-3064C13.1
				RP11-395P13.6	HSPB1
				AC010887.1	POU5F1P4
				HIST1H2BL	AC117395.1
				RP11-959F10.6	TMEM212
				RP11-780O24.2	LINC00485
				C22orf39	RP11-445N18.7
				IGHV1OR15-6	SIRT7
				RNF138	DYNLL1
				YBX1	TSC1
				AC007009.1	AC009133.20
				RFPL4AL1	RP11-691G17.1
				C12orf57	TMOD3
				RP11-83A24.2	GOLGA6L18
				RP3-508I15.22	MARVELD3
				FBXW5	LENG8
				FAM180B	C17orf58
				KDM1A	RP5-1185I7.1
				HSD3B7	RAD21
				NAP1L4P2	KIF5B
				PHPT1	AC005076.5
				LGMN	RP11-666G4.1
				RANBP10	SPATA1
				PLAA	AIF1L
				AC090559.1	CTD-2350C19.1
				MVD	RFPL4A
				FANCA	PHLDA2
				RP11-317J10.2	PAWR
				GDA	TFAM
				RERE	ELFN1
				RP11-455F5.4	RP11-248J18.2
				IST1	ANKMY2
				SPPL3	ARHGAP11A
				RN7SL421P	HOXB7
				NME1-NME2	AC090103.1
				ZNF595	RBM25
				CTD-2143L24.1	RP11-485G7.5
				BSN-AS1	FEM1B
				RPS26P3	SOCS7
				VAMP1	ATP10B
				TTC19	KAT2B
				RP11-87M18.2	ADAMTSL3
				RGPD4-AS1	RP11-376M2.2
				GAGE2B	HIPK2
				MTCH1	ZMYM5
				AC007285.7	ZNF512
				ZNF121	FAM46A
				STXBP1	ADRA2B
				GRPEL2	NAT16
				TOMM20	COL1A1
				RP11-44N22.3	DNAJB4
				RPP25	FLJ20306
				RP11-16N2.1	GSTM1
				VAPA	FRG1
				RNU6-7	PCAT7
				RNU6-8	RP11-169L17.3
				WBSCR17	RP11-583M2.2
				ZNF280C	RP11-936I5.1
				RN7SL85P	CTB-127C13.1
				RP5-857K21.11	MSI2
				RP11-394A14.2	LINC01149
				CYP21A1P	CDKN2B
				USP46	CTDSPL2
				LINC00674	RP11-680C21.1
				PIM3	TPTE2P5
				RP11-347C12.2	AL163953.3
				PAFAH1B2	KLK4
				TTC9B	RP11-373D23.2
				RP11-98O2.1	RP4-569M23.4
				MAGEC3	FCGR2A
				RP5-1142A6.8	CTC-350I8.1
				NPEPPS	BRD2-IT1
				PPIAP22	RNU7-18P
				RP11-130F10.1	MIR24-2
				AL353803.1	INSL6
				ZNRF2	MAPKAPK5-AS1
				AC005779.2	RP11-603J24.17
				DCXR	RP11-46H11.3
				LL22NC03-80A10.6	GPM6A
				MCMBP	AP1S3
				RN7SL130P	AC009133.14
				FYTTD1	TMEM74
				AP1M2	RN7SL543P
				TNFAIP2	GNAI3
				RP11-24J23.2	IL6ST
				RP11-378A13.1	BMS1P10
				ATP5F1P1	FAM199X
				TIMP1	TRA2B
				CDYL	KLHL25
				FTH1P23	AC009967.3
				RPSAP15	CHST10
				MIR4435-1HG	AC084018.1
				AXDND1	RP11-568K15.1
				KCTD9	CTD-2192J16.15
				LARP4	RP11-649A18.5
				LARP1B	CACUL1
				CABP1	OSER1
				CORO1C	RP11-354M1.2
				OGT	RP1-179N16.3
				RP11-10A14.4	CTRC
				RP11-277B15.2	AFF1
				FBXO21	LINC01141
				RP11-451H23.3	ADAMTS4
				SYK	RP11-17A4.2
				RP11-404P21.8	NRBP1
				PNMA5	NEDD4
				RP4-730K3.3	P2RX3
				R3HDML	KIAA1328
				RNF114	C14orf105
				FBL	JMJD1C
				EIF4A1	LINC00900
				UAP1L1	S1PR3
				IL17REL	DAW1
				ABHD5	NAF1
				RP11-170L3.7	FAM194A
				RP11-117D22.2	RPRD2
				STK17A	RP11-243E13.1
				CDK5RAP2	RP11-10L12.2
				TCEB2	CTB-50L17.16
				PPM1E	CKS2
				RAC1	RAD23B
				AC006378.2	RSL24D1
				AC009065.2	YBX1P1
				XXbac-B444P24.13	ARHGEF26-AS1
				RP11-838N2.5	KRR1
				PNLDC1	DPY19L2P3
				OXSR1	MIR181B1
				WDR83OS	AC113342.1
				ADAM22	USP8
				RP11-9L18.3	ZNRF1
				ZNF710	CTC-360G5.6
				RP13-314C10.5	DLGAP1-AS3
				DISC1-IT1	AC078852.2
				PHF13	FAM9B
				SNORD67	TIAL1
				AMD1	TMEM170A
				NDUFC2	RP11-274B21.1
				RP11-867G23.12	CRYBB2P1
				YES1	SYNJ1
				MIR3179-1	C17orf96
				DYNC1LI2	CTB-181H17.1
				ENHO	C4orf17
				AC131097.3	ATXN8OS
				GOLGA6L10	HK2
				RP11-402P6.9	ZDHHC20
				ARSB	RP4-665N4.8
				KIF9-AS1	ACPT
				TSKU	ARHGEF3
				RNU1-28P	HAUS3
				RNU1-27P	ARHGAP11B
				RNU1-1	PHAX
				RNVU1-18	CTD-2525I3.2
				RNU1-2	C1orf174
				RNU1-4	PCF11
				RNU1-3	RP11-425L10.1
				GALNT2	MIR4516
				KCNE4	ZNF420
				GAGE2A	KAT7
				GRM7	RP11-62J1.3
				TAX1BP1	AL034548.1
				LIN28A	STT3A-AS1
				RP1-17K7.2	ESCO1
				RP11-636O21.1	AP000925.2
				TMEM108	LINC00310
				RP11-362F19.1	TAF1A
				CYTH4	TNIK
				PSAP	ABHD17B
				2007-09-01	CTA-254O6.1
				RP11-621L6.2	KDM3A
				CTA-292E10.6	RP11-73M18.2
				UGDH-AS1	TBL1XR1
				PAPOLB	SHANK1
				GSTTP2	RP11-416I2.1
				NETO2	RP11-383M4.6
				GLUL	PAQR3
				MAFG	CTC-558O2.1
				RP11-715J22.6	DTNA
				PKN2	RP11-481J2.1
				SOD2	LCORL
				MIR302B
				RP11-118K6.3
				CTB-113D17.1
				PRPF40A
				RP11-394J1.2
				FADS6
				RPS2P46
				RP11-483F11.7
				RN7SL529P
				RIMS1
				S100B
				LAMC1
				CAT
				CNIH3
				AC098823.3
				DSEL
				MAP4K4
				MGAT5
				RP11-45L9.1
				PSMD2
				ADI1
				RP11-1085N6.3
				CACYBP
				TMEM189-UBE2V1
				NUP93
				PLB1
				CTD-3199J23.4
				HERC1
				RP3-335N17.2
				RP11-390M11.1
				LRRC49
				NUDT21
				PACSIN2
				RP11-77H9.5
				PTGIS
				RPL24P4
				PFN1
				FLCN
				RP11-227H15.4
				SNORA71D
				AMPD2
				ARL5B
				FBXL15
				RN7SL820P
				TBC1D23
				THOC3
				AC093391.2
				AC061975.4
				FKBP1A
				SPAG16
				RN7SL667P
				BCAM
				RP11-99A14.1
				RP11-178F10.1
				ASS1P2
				KIAA1279
				ANXA13
				RP11-886D15.1
				RP11-452F19.3
				RP1-86D1.3
				PTPRH
				POLRMTP1
				XPR1
				AC139099.3
				CTD-2031P19.4
				NR3C2
				SNORD17
				DOCK2
				TLK2
				HOOK1
				MMP11
				LSMD1
				PTPN12
				SMAD1
				CBX1
				PTS
				FUBP1
				RNF216
				SPSB3
				RP11-264F23.1
				AUTS2
				RP3-425P12.1
				MS4A1
				ADD2
				ACTBP12
				ZBTB2
				PDK3
				FAM210A
				MIR3176
				RPRD1B
				CDHR2
				RP11-486L19.2
				RP11-279F6.1
				CTF1
				RNU6-315P
				RP11-455G16.1
				RP3-417G15.1
				ABHD17A
				TMSB4X
				AL050321.1
				RP11-460N11.2
				ASB11
				RPLP0
				EIF4G2
				CDKN1B
				RNU6-1048P
				GPX4
				AL049539.1
				ACTG1P3
				RP11-445H22.4
				COPS8
				TRA2A
				DIP2A-IT1
				PNPLA2
				RP11-96H19.1
				B3GAT2
				TMEM38B
				KATNA1
				ITCH-AS1
				SYP
				CCDC50
				PLAU
				ABCC4
				ENOX1
				SSH1
				PDCD4-AS1
				C1orf229
				UBE2D3
				KIAA1210
				ATP6V0D2
				IFT20
				RRN3P3
				AC005517.3
				NETO1
				MTND4P12
				UBE2G1
				NUP54
				KIDINS220
				GFM1
				ADARB1
				AGBL4
				SKP1
				TCF24
				LAGE3
				LGALS1
				WI2-85898F10.1
				BMP4
				NDP
				ANP32B
				MIR3178
				SYNE1
				TMED3
				RP11-77H9.8
				AL591479.1
				AC135178.1
				CYP2D8P
				ZNF629
				PELI1
				BIK
				EML1
				IGLC3
				MGAT5B
				MCTP2
				SSB
				ARIH1
				BCYRN1
				RPSAP54
				RPL35
				HIST1H3G
				CD276
				CTD-2410N18.3
				ERO1L
				YBX3
				CYP2F1
				PLEKHA8
				LINC00202-1
				PLIN1
				AC021613.1
				RN7SL650P
				PPM1D
				SF3B1
				ARHGAP42P5
				FGL2
				UBA6
				RP11-118K6.2
				PGM5P2
				RP4-761J14.10
				RP11-64K12.9
				SLC39A8
				ANGPT2
				ZHX1
				GLS
				LRIG1
				ABCC9
				RP11-654D12.2
				NOC2L
				RP11-576E20.1
				VDAC2
				MAP1LC3B
				ACKR2
				NPM1P25
				STK24
				HLA-DRB6
				DDR1-AS1
				SLC25A26
				PDCL
				RP11-734I18.1
				PROM1
				ERLIN1
				MEMO1
				LEPREL1
				RPL36
				FKSG62
				SH3RF1
				NDUFS3

## Sheet: Down genes in senst cell_msigDB
Term	Overlap	P-value	Adjusted P-value	Old P-value	Old Adjusted P-value	Odds Ratio	Combined Score	Genes
Interferon Alpha Response	13/97	0.29571104474732884	0.9999957155747443	0	0	1.2203390731292516	1.486827569365	RTP4;RNF31;SAMD9L;CSF1;UBA7;TRAFD1;TDRD7;TMEM140;PARP9;IFIT3;OASL;IRF1;IRF2
DNA Repair	19/150	0.3290725107318402	0.9999957155747443	0	0	1.1436850342042137	1.2711797881928972	TSG101;RFC4;BRF2;TAF12;CSTF3;PRIM1;RPA2;XPC;SNAPC5;RAD52;POLA2;AGO4;NFX1;POLR3C;ERCC4;POLL;TK2;UMPS;TP53
Myc Targets V2	6/58	0.649460529269679	0.9999957155747443	0	0	0.9086474273390162	0.3921842380199657	AIMP2;PUS1;NIP7;PRMT3;PPAN;FARSA
E2F Targets	19/200	0.8162958757273817	0.9999957155747443	0	0	0.82540051538998	0.1675384734438004	GINS1;DCLRE1B;CDCA3;SUV39H1;RPA2;BRCA1;HMMR;AURKB;POLA2;PHF5A;MELK;KIF18B;ESPL1;UBE2T;ORC2;DEPDC1;TP53;ASF1B;E2F8
Pancreas Beta Cells	3/40	0.843790847995226	0.9999957155747443	0	0	0.6381981981981982	0.10839836317509714	VDR;PAX6;HNF1A
Wnt-beta Catenin Signaling	3/42	0.8667575722936801	0.9999957155747443	0	0	0.6054017094017095	0.08656999743087587	WNT5B;HEY2;TP53
Apical Surface	3/44	0.8866924446652324	0.9999957155747443	0	0	0.5758048780487804	0.06924462098033969	AFAP1L2;GHRL;BRCA1
Notch Signaling	2/32	0.8896823564882004	0.9999957155747443	0	0	0.5247149415074781	0.061334340250833674	WNT5A;DTX2
G2-M Checkpoint	17/200	0.916860349266471	0.9999957155747443	0	0	0.7297085936048956	0.06333878560861901	CASP8AP2;POLQ;SUV39H1;CCNF;RPA2;HMMR;AURKB;TRAIP;SLC7A5;POLA2;CHAF1A;ESPL1;E2F1;RAD54L;E2F2;E2F3;TNPO2
Estrogen Response Early	17/200	0.916860349266471	0.9999957155747443	0	0	0.7297085936048956	0.06333878560861901	KCNK5;XBP1;SLC26A2;OPN3;TGIF2;ENDOD1;ISG20L2;ASB13;CBFA2T3;CELSR2;RAPGEFL1;SEC14L2;SLC7A5;DEPTOR;SYT12;ESRP2;ANXA9
Hedgehog Signaling	2/36	0.9247914210332546	0.9999957155747443	0	0	0.46287924321216717	0.03619116608394172	HEY2;L1CAM
IL-6/JAK/STAT3 Signaling	6/87	0.9367892772267501	0.9999957155747443	0	0	0.5823732054261649	0.038027172490628994	CSF1;IL10RB;IRF1;CSF2RB;CBL;INHBE
Spermatogenesis	10/135	0.9476488101631586	0.9999957155747443	0	0	0.6285153811859118	0.03379608834726171	ZC2HC1C;RFC4;HSPA1L;GFI1;ALOX15;TULP2;IP6K1;PHF7;OAZ3;IL12RB2
heme Metabolism	16/200	0.9486584194311016	0.9999957155747443	0	0	0.682707819090008	0.03598312774695206	EPB42;ABCB6;KHNYN;CROCCP2;ENDOD1;MOSPD1;CTNS;CLCN3;EPOR;TRAK2;SPTA1;XK;SLC6A9;E2F2;DCAF10;NFE2L1
TGF-beta Signaling	3/54	0.9515299316893621	0.9999957155747443	0	0	0.462640522875817	0.022985894365657487	WWTR1;PMEPA1;SMAD6
Interferon Gamma Response	15/200	0.9702401890419279	0.9999957155747443	0	0	0.6362582421563655	0.0192223925952151	RTP4;RNF31;SAMD9L;CIITA;TRAFD1;CSF2RB;TDRD7;IFIT3;ICAM1;OASL;PSMA2;CASP3;IRF1;IRF2;IRF8
Glycolysis	15/200	0.9702401890419279	0.9999957155747443	0	0	0.6362582421563655	0.0192223925952151	ABCB6;HOMER1;PMM2;MPI;XYLT2;COG2;B3GALT6;HMMR;MERTK;GMPPB;CHST12;ADORA2B;DEPDC1;NDUFV3;LCT
p53 Pathway	15/200	0.9702401890419279	0.9999957155747443	0	0	0.6362582421563655	0.0192223925952151	PLK3;STEAP3;ABHD4;VDR;RHBDF2;OSGIN1;TRAFD1;XPC;PRKAB1;CDKN2AIP;PTPRE;TRAF4;DDIT3;ANKRA2;TP53
Androgen Response	6/100	0.9749450555527539	0.9999957155747443	0	0	0.5014629434991336	0.012724202392300614	ALDH1A3;SLC26A2;MAK;PMEPA1;MERTK;CAMKK2
Mitotic Spindle	14/199	0.9829362116120504	0.9999957155747443	0	0	0.5935758000072426	0.010216064247583662	PLEKHG2;TUBD1;CSNK1D;ARHGAP27;CYTH2;ESPL1;CENPJ;CDC42EP2;GEMIN4;ARFIP2;KNTC1;ARHGEF2;VCL;MAP3K11
TNF-alpha Signaling via NF-kB	14/200	0.9838918179729307	0.9999957155747443	0	0	0.5903509151070706	0.009586902770273168	CSF1;BCL2A1;FUT4;ICAM1;RELB;NFKB2;EFNA1;PTPRE;SPSB1;IRF1;SLC16A6;PMEPA1;NFKBIE;NFE2L2

## Sheet: Down genes in senst cell_GO bio
Term	Overlap	P-value	Adjusted P-value	Old P-value	Old Adjusted P-value	Odds Ratio	Combined Score	Genes
tRNA methylation (GO:0030488)	15/34	1.3036703734057522E-6	0.00462802982559042	0	0	6.253703965006349	84.73973310884581	METTL2B;TRMT10C;METTL1;METTL2A;THUMPD3;BCDIN3D;NSUN6;GTPBP3;TRMT5;TRMT12;LCMT2;TRMT44;TRMT61A;TRMT1L;TRMT61B
tRNA modification (GO:0006400)	20/65	1.8565261898393444E-5	0.032953339869648365	0	0	3.5233119371050408	38.38372960495066	METTL2B;AARS2;ANKRD16;TYW5;METTL1;PUS1;METTL2A;THUMPD3;BCDIN3D;NSUN6;ELP5;GTPBP3;DUS2;DTWD1;TRMT5;TRMT12;LCMT2;TRMT44;TRMT61A;TRMT61B
double-strand break repair (GO:0006302)	35/164	1.3976491416437632E-4	0.16538848176117862	0	0	2.1551296300179645	19.12795805350534	DCLRE1B;MDC1;SMARCAL1;SWSAP1;DCLRE1C;BRCA1;RECQL5;SLX4;EME1;SFR1;SMARCAD1;POLL;AP5S1;KDM4A;POLQ;XRCC4;DTX3L;KDM4D;RMI1;POLM;XRCC2;XRCC3;RPA2;ACTR8;PARP9;PALB2;IFFO1;SETX;RAD52;RAD51D;TDP2;ERCC4;UBE2V2;NABP1;FAN1
recombinational repair (GO:0000725)	20/79	3.6909723438817053E-4	0.32757379551950133	0	0	2.6851465308507976	21.22460767941985	SWSAP1;POLQ;KDM4D;RMI1;XRCC2;XRCC3;RPA2;BRCA1;PALB2;RAD52;RAD51D;RECQL5;SLX4;SFR1;ERCC4;NABP1;POLL;AP5S1;FAN1;RHNO1
DNA repair (GO:0006281)	53/298	5.070394162044049E-4	0.35999798550512746	0	0	1.7209758812615956	13.056909453882485	DCLRE1B;MUS81;MDC1;SMARCAL1;DCLRE1C;OGG1;BRCA1;EME1;POLI;POLL;PRMT6;WDHD1;RMI2;RFC4;DTX3L;ACTR8;PARP9;REXO4;TRAIP;NEIL3;RAD51D;UBE2V2;NEIL1;TP53;FAN1;RHNO1;XPC;RECQL5;SLX4;TDG;RAD54L;ATRIP;MUTYH;KDM4A;MGME1;POLQ;XRCC4;INTS3;XRCC2;XRCC3;APEX2;RPA2;FANCE;MLH3;FANCF;SETX;RAD52;MC1R;TDP2;ERCC4;UBE2T;NABP1;RAD9B
polyol biosynthetic process (GO:0046173)	7/16	0.0010363670632577262	0.6131838457608213	0	0	6.142574453349164	42.21197981362566	CYP27B1;ITPKC;ISYNA1;IPMK;CYP2R1;IP6K1;FGF2
RNA methylation (GO:0001510)	15/60	0.0021972733882227257	0.9999956719248779	0	0	2.6365802800119154	16.13728994219875	METTL2B;TRMT10C;METTL1;METTL2A;THUMPD3;BCDIN3D;NSUN6;GTPBP3;RBM15B;TRMT5;TRMT12;LCMT2;TRMT44;TRMT61A;TRMT61B
double-strand break repair via homologous recombination (GO:0000724)	21/97	0.0023361195078887157	0.9999956719248779	0	0	2.1876237973967174	13.255390243891375	MUS81;SWSAP1;POLQ;KDM4D;RMI1;XRCC2;XRCC3;RPA2;BRCA1;PALB2;RAD52;RAD51D;RECQL5;SLX4;SFR1;ERCC4;NABP1;RAD54L;POLL;AP5S1;FAN1
interstrand cross-link repair (GO:0036297)	14/55	0.002540786147306339	0.9999956719248779	0	0	2.700290852841534	16.13499862304168	DCLRE1B;MUS81;DCLRE1C;XRCC3;RPA2;FANCE;FANCF;NEIL3;SLX4;EME1;ERCC4;UBE2T;ATRIP;FAN1
DNA metabolic process (GO:0006259)	46/277	0.004567375401683959	0.9999956719248779	0	0	1.58044160944025	8.516709900326221	DCLRE1B;MUS81;SMARCAL1;PARG;OGG1;PRIM1;XPC;BRCA1;RECQL5;SLX4;TDG;ORC2;RAD54L;SMARCAD1;POLI;POLL;ZNF445;ATRIP;RAG1;MUTYH;TOP3B;WDHD1;DFFB;POLQ;RMI2;RFC4;INTS3;XRCC2;TINF2;TREX2;XRCC3;TOP3A;RPA2;TERF2;REXO4;RAD52;NEIL3;POLA2;RAD51D;ERCC4;UBE2T;UBE2V2;NABP1;NEIL1;RAD9B;FAN1
base-excision repair, AP site formation (GO:0006285)	7/20	0.004682020405110589	0.9999956719248779	0	0	4.251592574833893	22.805651206907907	NEIL3;OGG1;TDG;TINF2;NEIL1;TERF2;MUTYH
base-excision repair (GO:0006284)	12/48	0.005870976128688374	0.9999956719248779	0	0	2.634389409489811	13.534793007511352	PRMT6;POLQ;NEIL3;PARG;RFC4;OGG1;TDG;APEX2;RPA2;POLL;NEIL1;MUTYH
DNA modification (GO:0006304)	8/26	0.006189515621194957	0.9999956719248779	0	0	3.509824300915615	17.847100137578703	NEIL3;OGG1;TDG;TINF2;EXOSC3;NEIL1;TERF2;MUTYH
depurination (GO:0045007)	5/12	0.00723501006480452	0.9999956719248779	0	0	5.636756481952212	27.782577968570564	NEIL3;OGG1;TINF2;TERF2;MUTYH
snRNA metabolic process (GO:0016073)	6/17	0.00836354471558804	0.9999956719248779	0	0	4.305376866124529	20.59637585497035	INTS3;INTS2;INTS5;TUT1;INTS6;INTS8
tRNA processing (GO:0008033)	14/64	0.010666768566188114	0.9999956719248779	0	0	2.2131129968736043	10.048909809551695	PTCD1;TRMT10B;AARS2;ANKRD16;TRMT10C;TYW5;METTL1;ADAT1;NSUN6;TSEN2;ELP5;DTWD1;LCMT2;TRMT61A
glycerol ether metabolic process (GO:0006662)	3/5	0.011976866989344472	0.9999956719248779	0	0	11.83	52.3451265861239	LIPE;NCEH1;TMEM86B
mitochondrial tRNA methylation (GO:0070901)	3/5	0.011976866989344472	0.9999956719248779	0	0	11.83	52.3451265861239	TRMT10C;TRMT5;TRMT61B
negative regulation of histone deacetylation (GO:0031064)	3/5	0.011976866989344472	0.9999956719248779	0	0	11.83	52.3451265861239	PRMT6;SPHK2;FOXP3
mitochondrial tRNA modification (GO:0070900)	4/9	0.01268557543758635	0.9999956719248779	0	0	6.311071587372165	27.562278086759033	TRMT10C;PUS1;TRMT5;TRMT61B
snRNA processing (GO:0016180)	7/26	0.021779119339346648	0.9999956719248779	0	0	2.908000187467779	11.128345576513631	TOE1;INTS3;INTS2;INTS5;TUT1;INTS6;INTS8
GDP-mannose metabolic process (GO:0019673)	3/6	0.021957307974212904	0.9999956719248779	0	0	7.886222222222222	30.1147639511006	GMPPB;MPI;PMM2
response to DNA damage checkpoint signaling (GO:0072423)	3/6	0.021957307974212904	0.9999956719248779	0	0	7.886222222222222	30.1147639511006	MUS81;SLX4;EME1
RNA modification (GO:0009451)	12/58	0.026269033673198935	0.9999956719248779	0	0	2.0605319830044815	7.499026868432292	DTWD1;RBM15B;AARS2;ANKRD16;TYW5;APOBEC3G;METTL1;BCDIN3D;NSUN6;LCMT2;ELP5;TRMT61A
negative regulation of histone modification (GO:0031057)	5/16	0.027221074050097147	0.9999956719248779	0	0	3.5862180524102234	12.923882883738793	PRMT6;SPHK2;THAP7;BRCA1;FOXP3
resolution of meiotic recombination intermediates (GO:0000712)	5/16	0.027221074050097147	0.9999956719248779	0	0	3.5862180524102234	12.923882883738793	MUS81;SLX4;EME1;RMI1;ERCC4
inositol phosphate biosynthetic process (GO:0032958)	4/11	0.02764235855350284	0.9999956719248779	0	0	4.50740011433653	16.174381400829883	ITPKC;IPMK;IP6K1;FGF2
positive regulation of transcription from RNA polymerase II promoter in response to endoplasmic reticulum stress (GO:1990440)	4/11	0.02764235855350284	0.9999956719248779	0	0	4.50740011433653	16.174381400829883	CREB3L3;DDIT3;TP53;MBTPS2

## Sheet: Down genes in senst cell_GOMF
Term	Overlap	P-value	Adjusted P-value	Old P-value	Old Adjusted P-value	Odds Ratio	Combined Score	Genes
tRNA methyltransferase activity (GO:0008175)	8/16	1.4293366162740473E-4	0.10091116510894774	0	0	7.901559020044544	69.95352873338824	METTL2B;METTL2A;TRMT5;TRMT12;BCDIN3D;THUMPD3;LCMT2;TRMT44
RNA polymerase II transcription regulatory region sequence-specific DNA binding (GO:0000977)	188/1359	0.001427694869070958	0.4057611902946443	0	0	1.2887261358537538	8.443339440143095	ZNF572;ZNF175;ZNF691;ZNF174;ZBTB24;GFI1;ZBTB22;CARF;ETS1;IKZF4;SPIB;CREB3L3;ZNF85;ZSCAN32;ZNF449;HOXA3;ZNF205;ZNF446;ZNF445;ZNF324;ZNF202;ZNF444;SOX7;ZNF443;ZNF441;EOMES;ZNF561;MEF2C;ZNF19;ZNF681;ZNF284;ZNF680;ZNF282;ZBTB38;ZFP69B;BHLHA15;RFX1;HNF1A;FOXP3;ZNF16;MYCL;ZNF91;ZSCAN20;ZFP41;DDIT3;ZSCAN22;ZNF319;RFX5;ZSCAN21;ZNF438;TBPL1;ZNF436;ZNF557;ZNF799;TP53;ZNF554;ZSCAN29;ZNF397;ZNF275;ZNF671;ZNF…
tRNA (guanine) methyltransferase activity (GO:0016423)	6/13	0.0017241976924701598	0.4057611902946443	0	0	6.767118062178143	43.05912785432017	TRMT10B;TRMT10C;METTL1;TRMT5;THUMPD3;TRMT1L
endodeoxyribonuclease activity, producing 3'-phosphomonoesters (GO:0016889)	4/9	0.01268557543758635	0.9999949241183232	0	0	6.311071587372165	27.562278086759033	MUS81;SLX4;XRCC3;TEFM
catalytic activity, acting on a tRNA (GO:0140101)	9/35	0.01335472269658482	0.9999949241183232	0	0	2.7335972850678734	11.797892056228164	DUS2;DTWD1;AARS2;TRMT5;ELAC1;TRMT12;BCDIN3D;LCMT2;DUS4L
RNA polymerase II cis-regulatory region sequence-specific DNA binding (GO:0000978)	153/1149	0.014729302841737789	0.9999949241183232	0	0	1.2253313253012048	5.168345066407528	ZNF572;ZNF175;ZNF691;ZNF174;ZBTB24;GFI1;CARF;ETS1;IKZF4;SPIB;CREB3L3;ZNF85;ZSCAN32;ZNF449;HOXA3;ZNF205;ZNF446;ZNF445;ZNF324;ZNF202;ZNF444;SOX7;EOMES;ZNF561;MEF2C;ZNF681;ZNF284;ZNF680;ZBTB38;BHLHA15;RFX1;HNF1A;FOXP3;ZNF16;MYCL;ZNF91;ZSCAN20;DDIT3;ZSCAN22;ZNF319;RFX5;ZSCAN21;ZNF438;TP53;ZSCAN29;ZNF397;ZNF275;ZNF671;ZNF792;ZNF274;ZNF324B;ZNF790;MYNN;GLIS3;ZBTB4;ZKSCAN3;ZNF426;ZNF701;ZSCAN12;ZKSCAN5;…
cis-regulatory region sequence-specific DNA binding (GO:0000987)	153/1149	0.014729302841737789	0.9999949241183232	0	0	1.2253313253012048	5.168345066407528	ZNF572;ZNF175;ZNF691;ZNF174;ZBTB24;GFI1;CARF;ETS1;IKZF4;SPIB;CREB3L3;ZNF85;ZSCAN32;ZNF449;HOXA3;ZNF205;ZNF446;ZNF445;ZNF324;ZNF202;ZNF444;SOX7;EOMES;ZNF561;MEF2C;ZNF681;ZNF284;ZNF680;ZBTB38;BHLHA15;RFX1;HNF1A;FOXP3;ZNF16;MYCL;ZNF91;ZSCAN20;DDIT3;ZSCAN22;ZNF319;RFX5;ZSCAN21;ZNF438;TP53;ZSCAN29;ZNF397;ZNF275;ZNF671;ZNF792;ZNF274;ZNF324B;ZNF790;MYNN;GLIS3;ZBTB4;ZKSCAN3;ZNF426;ZNF701;ZSCAN12;ZKSCAN5;…
store-operated calcium channel activity (GO:0015279)	4/10	0.019280714516639035	0.9999949241183232	0	0	5.258929894768045	20.765673163452817	TRPC1;ORAI3;ORAI2;ORAI1
STAT family protein binding (GO:0097677)	3/6	0.021957307974212904	0.9999949241183232	0	0	7.886222222222222	30.1147639511006	FAM220A;DTX3L;PARP9
crossover junction endodeoxyribonuclease activity (GO:0008821)	3/6	0.021957307974212904	0.9999949241183232	0	0	7.886222222222222	30.1147639511006	SLX4;XRCC3;TEFM
nucleosomal histone binding (GO:0031493)	3/6	0.021957307974212904	0.9999949241183232	0	0	7.886222222222222	30.1147639511006	L3MBTL1;SPHK2;THAP7
purine ribonucleotide transmembrane transporter activity (GO:0005346)	4/11	0.02764235855350284	0.9999949241183232	0	0	4.50740011433653	16.174381400829883	SLC35B3;SLC25A17;SLC25A42;SLC25A25
adenine nucleotide transmembrane transporter activity (GO:0000295)	4/12	0.03784604896200693	0.9999949241183232	0	0	3.9437527790128946	12.912748500376175	SLC35B3;SLC25A17;SLC25A42;SLC25A25
exodeoxyribonuclease activity, producing 5'-phosphomonoesters (GO:0016895)	4/12	0.03784604896200693	0.9999949241183232	0	0	3.9437527790128946	12.912748500376175	DCLRE1B;MGME1;DCLRE1C;TREX2
mRNA methyltransferase activity (GO:0008174)	4/12	0.03784604896200693	0.9999949241183232	0	0	3.9437527790128946	12.912748500376175	TRMT10C;TRMT61A;CMTR2;TRMT61B
SUMO binding (GO:0032183)	4/13	0.04992018541886308	0.9999949241183232	0	0	3.505360407094511	10.506721350269094	CASP8AP2;SIMC1;TDG;RNF111
DNA N-glycosylase activity (GO:0019104)	3/8	0.05175038662935862	0.9999949241183232	0	0	4.7312	14.010613155423389	NEIL3;TDG;NEIL1
damaged DNA binding (GO:0003684)	9/44	0.053677191910711124	0.9999949241183232	0	0	2.029640947288006	5.936227066092025	DCLRE1B;POLQ;NEIL3;DCLRE1C;ERCC4;OGG1;TDG;RPA2;XPC

## Sheet: Up genes in senst cell_msigDB
Term	Overlap	P-value	Adjusted P-value	Old P-value	Old Adjusted P-value	Odds Ratio	Combined Score	Genes
TNF-alpha Signaling via NF-kB	40/200	7.805694130843529E-7	3.9028470654217646E-5	0	0	2.6096187175043326	36.699699987331215	CDKN1A;BTG1;RNF19B;AREG;SAT1;PANX1;ZFP36;NFIL3;DNAJB4;CCNL1;PHLDA2;PDLIM5;JUNB;IER5;IER2;ABCA1;JUN;EGR2;JAG1;GADD45B;PLK2;IL18;ZBTB10;FOS;ATP2B1;KLF4;RHOB;VEGFA;FOSL1;NR4A2;TUBB2A;BCL6;ID2;FOSB;SIK1;SGK1;IL6ST;MXD1;ATF3;HBEGF
TGF-beta Signaling	11/54	0.006911874230052131	0.17176357643271978	0	0	2.6433139534883723	13.149203440411213	CDKN1C;PPM1A;APC;SMURF1;ID2;CTNNB1;ARID4B;JUNB;TGFBR1;SMAD7;HIPK2
p53 Pathway	28/200	0.010305814585963186	0.17176357643271978	0	0	1.6864667974222471	7.715664896079007	CDKN1A;BTG1;PCNA;PVT1;RGS16;RNF19B;ACVR1B;SAT1;TOB1;ZFP36L1;ZMAT3;HMOX1;SFN;IER5;TSPYL2;HEXIM1;JUN;ST14;CDKN2B;PLK2;ABCC5;FOS;KLF4;DDIT4;TXNIP;MXD1;ATF3;HBEGF
Unfolded Protein Response	16/113	0.0406648723933263	0.5083109049165787	0	0	1.7041853907833289	5.457467353413855	TSPYL2;NOP56;ZBTB17;NFYA;CEBPG;CXXC1;VEGFA;ERN1;CNOT4;DNAJC3;TUBB2A;BAG3;KIF5B;DDIT4;ATF3;DCP2
UV Response Up	19/158	0.10567025597560649	0.942279396230811	0	0	1.4113777471173745	3.171975267558261	LYN;CDKN1C;CDKN2B;BTG1;TGFBRAP1;CEBPG;HNRNPU;FOS;RHOB;NXF1;CA2;PPAT;AGO2;HMOX1;FOSB;MSX1;IL6ST;JUNB;ATF3
Mitotic Spindle	23/199	0.11307352754769731	0.942279396230811	0	0	1.3496561004784688	2.94186832694711	NOTCH2;TRIO;PCGF5;ITSN1;TSC1;RHOF;SSH2;DYNLL2;CD2AP;NET1;LATS1;ANLN;AKAP13;APC;EPB41L2;KIF5B;ARHGEF3;TLK1;KIF1B;TUBGCP3;MAPRE1;PDLIM5;RAPGEF6
UV Response Dn	17/144	0.13602351228931459	0.9463705848723668	0	0	1.3814722703561713	2.755937055373776	NOTCH2;PHF3;CITED2;NEK7;DYRK1A;PRDM2;PRKCA;SYNJ2;ATP2B1;KALRN;ACVR2A;IGF1R;SMAD7;COL1A1;GJA1;PRKAR2B;PDLIM5
Wnt-beta Catenin Signaling	6/42	0.163628904421111	0.9463705848723668	0	0	1.7179414542020774	3.1097389267012807	JAG1;HEY1;TCF7;CTNNB1;CSNK1E;GNAI1
Hypoxia	22/200	0.17034670527702603	0.9463705848723668	0	0	1.2755988976044095	2.25770733239089	CDKN1C;JUN;CDKN1A;KDM3A;TES;DTNA;BTG1;CITED2;ZNF292;TPBG;NEDD4L;PRKCA;FOS;KLHL24;HK2;VEGFA;ZFP36;NFIL3;DDIT4;HMOX1;GAPDH;ATF3
Cholesterol Homeostasis	9/74	0.2060622576000638	0.9549405378196768	0	0	1.4273640094298436	2.2546312664204	STARD4;JAG1;NFIL3;FASN;CTNNB1;CPEB2;ATF3;GNAI1;ACTG1
Hedgehog Signaling	5/36	0.21008691832032889	0.9549405378196768	0	0	1.6620392357432507	2.593170020452941	TLE1;HEY1;PLG;PML;VEGFA
Apoptosis	17/161	0.25854487100753176	0.9999843521326353	0	0	1.2172375839351324	1.6465402602065646	JUN;CREBBP;CDKN1A;GSTM1;ANXA1;GADD45B;IL18;HSPB1;SAT1;SMAD7;RHOB;DNAJC3;DPYD;TXNIP;HMOX1;CTNNB1;ATF3
Estrogen Response Early	20/200	0.3175805993426247	0.9999843521326353	0	0	1.145313788945999	1.313701987323052	SLC16A1;BCL11B;TPBG;KRT8;FOS;GAB2;KLF4;AREG;TOB1;AFF1;AKAP1;IGF1R;GJA1;INPP5F;FASN;KRT15;TBC1D30;NRIP1;SFN;IL6ST
Inflammatory Response	20/200	0.3175805993426247	0.9999843521326353	0	0	1.145313788945999	1.313701987323052	LYN;ABCA1;CDKN1A;RGS16;TPBG;ADRM1;IL18;GNAI3;CXCR6;AHR;ATP2B1;ACVR1B;HIF1A;ACVR2A;RNF144B;IRF7;FFAR2;KIF1B;MXD1;HBEGF
Androgen Response	10/100	0.3924108488883754	0.9999843521326353	0	0	1.1444886112688497	1.070607183756877	ELK4;ADRM1;KRT8;ZBTB10;GNAI3;LIFR;GPD1L;SGK1;PDLIM5;SAT1
G2-M Checkpoint	18/200	0.507447288059189	0.9999843521326353	0	0	1.018179196730252	0.690694523593281	NOTCH2;HSPA8;DR1;RBM14;CUL5;UBE2C;HNRNPU;PRPF4B;HIF1A;RAD23B;PML;RPS6KA5;RBL1;RAD21;KIF5B;TRA2B;CKS2;EZH2
Estrogen Response Late	18/200	0.507447288059189	0.9999843521326353	0	0	1.018179196730252	0.690694523593281	ST14;SLC16A1;TPBG;EMP2;FOS;KLF4;AREG;PRLR;TOB1;AFF1;ZFP36;PRKAR2B;CA2;ID2;NRIP1;SFN;SGK1;IL6ST
Notch Signaling	3/32	0.5478079667837532	0.9999843521326353	0	0	1.0649087221095335	0.6408945263446598	NOTCH2;JAG1;PRKCA

## Sheet: Up genes in senst cell_GO bio
Term	Overlap	P-value	Adjusted P-value	Old P-value	Old Adjusted P-value	Odds Ratio	Combined Score	Genes
negative regulation of cell cycle G1/S phase transition (GO:1902807)	10/35	6.727391278910892E-4	0.9105582954278121	0	0	4.134923339011925	30.20211241859875	CDKN2D;CDKN1A;CDKN2B;RBL1;APC;DCUN1D3;JADE1;CDK2AP2;KLF4;CDC73
negative regulation of G1/S transition of mitotic cell cycle (GO:2000134)	10/37	0.0010840620256253738	0.9105582954278121	0	0	3.8282120848844303	26.135357638340068	CDKN2D;CDKN1A;CDKN2B;RBL1;APC;DCUN1D3;JADE1;CDK2AP2;KLF4;CDC73
positive regulation of nuclear-transcribed mRNA catabolic process, deadenylation-dependent decay (GO:1900153)	6/15	0.001185320210227155	0.9105582954278121	0	0	6.881964117091596	46.368900885374075	ZFP36;AGO2;TOB1;ZFP36L2;ZFP36L1;TNRC6B
regulation of nuclear-transcribed mRNA catabolic process, deadenylation-dependent decay (GO:1900151)	6/15	0.001185320210227155	0.9105582954278121	0	0	6.881964117091596	46.368900885374075	ZFP36;AGO2;TOB1;ZFP36L2;ZFP36L1;TNRC6B
positive regulation of mRNA catabolic process (GO:0061014)	11/44	0.0012545581364395318	0.9105582954278121	0	0	3.4462121212121213	23.024046174090927	ZFP36;YTHDF3;CELF1;AGO2;RC3H1;ZC3HAV1;PUM1;TOB1;ZFP36L2;ZFP36L1;TNRC6B
regulation of G1/S transition of mitotic cell cycle (GO:2000045)	14/71	0.003385525576721897	0.9999954092209238	0	0	2.5402949605088416	14.449822948408068	KMT2E;CDKN2D;CDKN1A;CDKN2B;DDX3X;ANXA1;DCUN1D3;JADE1;KLF4;CDC73;RBL1;APC;ID2;CDK2AP2
regulation of keratinocyte proliferation (GO:0010837)	7/24	0.003788504140829599	0.9999954092209238	0	0	4.251167133520075	23.703589784707777	NOTCH2;ZFP36;STXBP4;CASK;PTPRK;AREG;ZFP36L1
regulation of microtubule cytoskeleton organization (GO:0070507)	9/37	0.004164846748457996	0.9999954092209238	0	0	3.3202732284741368	18.19866923908352	GSK3B;PRKAA1;TAOK1;CDK2AP2;TRIM36;MAPRE1;MAPRE2;BICD2;CLASP2
cellular response to forskolin (GO:1904322)	4/9	0.00536561850116414	0.9999954092209238	0	0	8.250820599886813	43.133174792716105	ADCY2;AHR;CFTR;GNAI1
response to forskolin (GO:1904321)	4/9	0.00536561850116414	0.9999954092209238	0	0	8.250820599886813	43.133174792716105	ADCY2;AHR;CFTR;GNAI1
regulation of trophoblast cell migration (GO:1901163)	5/14	0.005485470923697971	0.9999954092209238	0	0	5.7317226626399895	29.83735544684219	GJA1;YTHDF3;AGO2;ACVR1B;VEGFA
coronary artery morphogenesis (GO:0060982)	3/5	0.006045596693043811	0.9999954092209238	0	0	15.46408371040724	78.99711323959035	TBX1;TGFBR1;VEGFA
regulation of DNA-templated transcription, initiation (GO:2000142)	12/61	0.00654710927062993	0.9999954092209238	0	0	2.5311227390330777	12.728337051803303	FOSL1;CDKN1A;BCLAF1;JUN;MED13;TRIM28;AGO3;CTNNB1;MITF;SOX9;MED26;TNRC6B
negative regulation of protein modification by small protein conjugation or removal (GO:1903321)	11/55	0.007964989508737072	0.9999954092209238	0	0	2.583096590909091	12.483329998013218	PRR7;USP4;NXN;DCUN1D3;CRY1;SPOPL;CTNNB1;SPRY2;ISG15;SIRT7;SMAD7
adherens junction assembly (GO:0034333)	4/10	0.008320731729403832	0.9999954092209238	0	0	6.87530654593473	32.92587797346139	ZNF703;CTNNB1;ACTB;SMAD7
peptidyl-lysine acetylation (GO:0018394)	4/10	0.008320731729403832	0.9999954092209238	0	0	6.87530654593473	32.92587797346139	KAT2B;CREBBP;ESCO1;KAT7
cellular response to corticosteroid stimulus (GO:0071384)	5/16	0.010308401569106623	0.9999954092209238	0	0	4.689076495418512	21.451568535216833	ZFP36;ANXA1;HNRNPU;ZFP36L2;ZFP36L1
odontogenesis of dentin-containing tooth (GO:0042475)	5/16	0.010308401569106623	0.9999954092209238	0	0	4.689076495418512	21.451568535216833	TBX1;EDA;ANKRD11;MSX1;LRP6
regulation of activin receptor signaling pathway (GO:0032925)	5/16	0.010308401569106623	0.9999954092209238	0	0	4.689076495418512	21.451568535216833	FST;ACVR1B;ACVR2B;ACVR2A;SMAD7
histone H3-K36 methylation (GO:0010452)	3/6	0.011297044158612176	0.9999954092209238	0	0	10.308823529411764	46.21666368562023	SETD2;PRDM9;ASH1L
histone H4-K12 acetylation (GO:0043983)	3/6	0.011297044158612176	0.9999954092209238	0	0	10.308823529411764	46.21666368562023	JADE1;JADE3;KAT7
negative regulation of erythrocyte differentiation (GO:0045647)	3/6	0.011297044158612176	0.9999954092209238	0	0	10.308823529411764	46.21666368562023	ZFP36;MAFB;ZFP36L1
peptidyl-glutamine methylation (GO:0018364)	3/6	0.011297044158612176	0.9999954092209238	0	0	10.308823529411764	46.21666368562023	TRMT112;CREBBP;SIRT7
positive regulation of activin receptor signaling pathway (GO:0032927)	3/6	0.011297044158612176	0.9999954092209238	0	0	10.308823529411764	46.21666368562023	ACVR1B;ACVR2B;ACVR2A
positive regulation of neurotransmitter secretion (GO:0001956)	3/6	0.011297044158612176	0.9999954092209238	0	0	10.308823529411764	46.21666368562023	SLC4A8;NLGN1;BAIAP3
cellular glucose homeostasis (GO:0001678)	9/43	0.011683476838293601	0.9999954092209238	0	0	2.733441276624157	12.162664737341993	ERN1;PRKAA1;TRA2B;FOXK2;ZNF236;HIF1A;FOXO1;HK2;IGF1R
regulation of microtubule-based process (GO:0032886)	8/36	0.011901398265552126	0.9999954092209238	0	0	2.9496799286929747	13.070324916386902	GSK3B;PRKAA1;APC;TAOK1;CDK2AP2;TRIM36;BICD2;CLASP2
midbrain dopaminergic neuron differentiation (GO:1904948)	4/11	0.012169163355231525	0.9999954092209238	0	0	5.892796507397526	25.98045659369348	NR4A2;RYK;CTNNB1;LRP6
negative regulation of T-helper cell differentiation (GO:0045623)	4/11	0.012169163355231525	0.9999954092209238	0	0	5.892796507397526	25.98045659369348	ANXA1;RC3H1;SMAD7;SOCS5
positive regulation of transcription, DNA-templated (GO:0045893)	127/1183	0.012388731694306045	0.9999954092209238	0	0	1.256273386234609	5.51625618023162	ATF2;ZNF296;CCNT2;RASL11A;HNRNPU;PRDM2;AHR;YY1;ELK4;RPS6KA5;TRIM28;CREB3L2;EPC1;KAT7;SOX9;IER5;JUNB;IER2;MEF2A;DYRK1A;MITF;MYCN;TBL1XR1;KAT6A;TFAM;HOXB7;ATF3;KMT2E;TNKS;KMT2C;HIF1A;RLF;FOXO1;RFPL4A;ZNF827;TASP1;PPARGC1B;SNX5;ZBED4;ZBTB17;AKIRIN2;CREBBP;JUN;DR1;EGR2;JAG1;POU2F1;BCL11B;NFATC3;SMAD5;SMAD7;COL1A1;FOSL1;NR4A2;MAFB;BAMBI;ID2;AGO2;CREBRF;CDKN1C;CSRNP1;DDX3X;CITED2;AKAP8L;RSF1;ING1;GLI3;…
regulation of stem cell proliferation (GO:0072091)	5/17	0.013557267931671562	0.9999954092209238	0	0	4.298084182710457	18.485340126703512	YAP1;GJA1;AGO3;HNRNPU;ZFP36L1
positive regulation of nucleic acid-templated transcription (GO:1903508)	60/511	0.014790186861560499	0.9999954092209238	0	0	1.3823168463872089	5.824794795177018	CDKN1C;CITED2;RSF1;AHR;ING1;GLI3;MED13;HEY1;TRIM28;CREB3L2;SPIN1;EPC1;SOX9;NCOA1;DYRK1A;MITF;FOS;RGMB;ARID1B;TGFBR1;PPM1A;MYCN;MDFIC;TBL1XR1;KAT6A;IRF7;TFAM;KMT2E;YAP1;KDM3A;CXXC1;FOXK2;HIF1A;RLF;FOXO1;LRP6;RFPL4A;NFIL3;TASP1;SNX5;BRD4;TBX1;MAP3K2;ATF7IP;CREBBP;JUN;EGR2;NFYA;KLF4;SMAD5;PML;HIPK2;CTCFL;COL1A1;RYBP;MAFB;BAMBI;ID2;CTNNB1;NAA16
regulation of myeloid cell differentiation (GO:0045637)	12/68	0.015451990478517568	0.9999954092209238	0	0	2.2138796394055062	9.231916729352434	KMT2E;LYN;CNOT4;KAT2B;CREBBP;RBM15;MAFB;AGO3;SIN3A;KMT2C;CDC73;TNRC6B
synaptic vesicle endocytosis (GO:0048488)	8/38	0.016435375456676348	0.9999954092209238	0	0	2.7527320854603894	11.309102153976553	DNM3;NLGN1;SYNJ1;ITSN1;FCHO2;STON2;SYNJ2;VAMP2
dosage compensation by inactivation of X chromosome (GO:0009048)	4/12	0.016992992630427608	0.9999954092209238	0	0	5.155913978494624	21.010113414894946	SMCHD1;RBM15;PCGF5;HNRNPU
exit from mitosis (GO:0010458)	4/12	0.016992992630427608	0.9999954092209238	0	0	5.155913978494624	21.010113414894946	EPS8;UBE2C;SIRT7;CLASP2
histone H3-K9 demethylation (GO:0033169)	4/12	0.016992992630427608	0.9999954092209238	0	0	5.155913978494624	21.010113414894946	KDM3A;KDM4C;JMJD1C;KDM7A
cellular response to glucocorticoid stimulus (GO:0071385)	5/18	0.017430325427859543	0.9999954092209238	0	0	3.967244533495949	16.065530301629114	ZFP36;ANXA1;HNRNPU;ZFP36L2;ZFP36L1
negative regulation of gene expression (GO:0010629)	40/322	0.01829150406645681	0.9999954092209238	0	0	1.4706376423253888	5.884489730919167	YAP1;NOTCH2;PRKAA1;DDX3X;CITED2;CELF1;HIF1A;TOB1;ZFP36L2;CRKL;FXR1;YY1;ZFP36;RPS6KA5;RNF139;CREB3L1;CCL3;EPC1;ZNF503;ZNF148;NDFIP2;ABCC2;TSC1;DICER1;ATP2B1;KLF4;VEGFA;FOXP1;ERN1;KAT2B;MYCN;SHQ1;RBL1;AGO3;ID2;AGO2;GAPDH;DCP2;EZH2;TNRC6B
membrane invagination (GO:0010324)	3/7	0.018477676486736396	0.9999954092209238	0	0	7.731193438914027	30.85667703205802	SMURF1;FCHO2;FNBP1L
miRNA loading onto RISC involved in gene silencing by miRNA (GO:0035280)	3/7	0.018477676486736396	0.9999954092209238	0	0	7.731193438914027	30.85667703205802	AGO3;AGO2;DICER1
nose development (GO:0043584)	3/7	0.018477676486736396	0.9999954092209238	0	0	7.731193438914027	30.85667703205802	SMCHD1;PROX1;GLI3
positive regulation of trophoblast cell migration (GO:1901165)	3/7	0.018477676486736396	0.9999954092209238	0	0	7.731193438914027	30.85667703205802	AGO2;ACVR1B;VEGFA
vesicle cytoskeletal trafficking (GO:0099518)	8/39	0.019117210317675194	0.9999954092209238	0	0	2.6637878981940606	10.541051663498438	MYO1D;RAB1A;MYO1B;KIF5B;MYO7B;FNBP1L;TANC2;NDEL1
histone deacetylation (GO:0016575)	9/47	0.020547080441831327	0.9999954092209238	0	0	2.4451729493996055	9.499585959391277	ELK4;MORF4L1;RBM14;SIN3A;TBL1XR1;BRMS1L;MIER1;SIRT7;MTA2
histone acetylation (GO:0016573)	12/71	0.021289871958219967	0.9999954092209238	0	0	2.1009626039448452	8.087705576775479	ATF2;KAT2B;MORF4L1;CREBBP;DR1;ZZZ3;KAT6A;JADE1;EPC1;JADE3;KAT7;TAF5L
histone H4-K16 acetylation (GO:0043984)	5/19	0.021969875214761923	0.9999954092209238	0	0	3.6836676913120856	14.064549256557282	KANSL1;JADE1;MSL2;JADE3;KAT7
positive regulation of nuclear-transcribed mRNA poly(A) tail shortening (GO:0060213)	4/13	0.0228561819933893	0.9999954092209238	0	0	4.582783122681255	17.31620024646947	ZFP36;AGO2;TOB1;TNRC6B
positive regulation of protein acetylation (GO:1901985)	4/13	0.0228561819933893	0.9999954092209238	0	0	4.582783122681255	17.31620024646947	PRKAA1;DDX3X;TAOK1;TERF2IP
regulation of protein acetylation (GO:1901983)	4/13	0.0228561819933893	0.9999954092209238	0	0	4.582783122681255	17.31620024646947	GSK3B;DDX3X;TAOK1;TERF2IP
synaptic vesicle localization (GO:0097479)	4/13	0.0228561819933893	0.9999954092209238	0	0	4.582783122681255	17.31620024646947	NLGN1;SYNJ1;KIF5C;KIF5B
negative regulation of cellular response to growth factor stimulus (GO:0090288)	13/80	0.02297095565302991	0.9999954092209238	0	0	2.004533645764352	7.5641571415822675	SMURF1;SPRY4;UBE2D1;CASK;ACVR2B;SMAD5;ACVR2A;HIPK2;SMAD7;BAMBI;CREB3L1;NEDD4;SPRY2
histone H4 acetylation (GO:0043967)	9/48	0.02336443820419836	0.9999954092209238	0	0	2.382345237055793	8.949375528086737	ATF2;MORF4L1;ZZZ3;KANSL1;JADE1;MSL2;EPC1;JADE3;KAT7

## Sheet: Up genes in senst cell_GO MF
Term	Overlap	P-value	Adjusted P-value	Old P-value	Old Adjusted P-value	Odds Ratio	Combined Score	Genes
protein serine/threonine kinase inhibitor activity (GO:0030291)	9/30	8.423269823156675E-4	0.30647854232519145	0	0	4.428733581968542	31.35252088954074	CDKN2D;HEXIM1;KAT2B;CDKN1A;CDKN2B;PRKAR2B;HSPB1;SPRY2;SFN
cyclin-dependent protein serine/threonine kinase inhibitor activity (GO:0004861)	5/10	9.329635991634443E-4	0.30647854232519145	0	0	10.319365798414497	71.99970501032523	CDKN2D;HEXIM1;KAT2B;CDKN1A;CDKN2B
transforming growth factor beta receptor binding (GO:0005160)	6/18	0.003487338947588721	0.496494628416223	0	0	5.1606232294617564	29.201986790466798	TGFBR3L;USP15;BAMBI;TGFBRAP1;TGFBR1;SMAD7
I-SMAD binding (GO:0070411)	5/13	0.003800843566807027	0.496494628416223	0	0	6.448541902604757	35.93470768950452	SMURF1;CTNNB1;SMAD5;TGFBR1;SMAD7
cyclin-dependent protein serine/threonine kinase regulator activity (GO:0016538)	10/44	0.004370546153803761	0.496494628416223	0	0	3.038881651468083	16.509840751908964	CDKN2D;HEXIM1;KAT2B;CDKN1A;CDKN2B;CCNT2;CCNY;CKS2;CCNL1;CCNJL
ATPase regulator activity (GO:0060590)	9/38	0.005036565765758622	0.496494628416223	0	0	3.2056049160436806	16.960954423036853	BAG4;HSPH1;PLN;DNAJB6;BAG3;DNAJB4;TSC1;ATP1B1;FNIP2
activin-activated receptor activity (GO:0017002)	4/9	0.00536561850116414	0.496494628416223	0	0	8.250820599886813	43.133174792716105	ACVR1B;ACVR2B;ACVR2A;TGFBR1
ATPase inhibitor activity (GO:0042030)	3/5	0.006045596693043811	0.496494628416223	0	0	15.46408371040724	78.99711323959035	PLN;TSC1;FNIP2
kinase inhibitor activity (GO:0019210)	8/33	0.00691958133284749	0.4969746132925743	0	0	3.304186046511628	16.433038924086254	CDKN1C;HEXIM1;DNAJC3;CDKN1A;GMFB;SPRY4;PARVA;LRP6
histone acetyltransferase binding (GO:0035035)	6/21	0.008097529014093163	0.4969746132925743	0	0	4.127818696883852	19.880385233379098	MEF2A;PCNA;KANSL1;CITED2;HIF1A;GLI3
cAMP response element binding (GO:0035497)	4/10	0.008320731729403832	0.4969746132925743	0	0	6.87530654593473	32.92587797346139	ATF2;JUN;CREB3L1;CREB3L2
RNA polymerase II-specific DNA-binding transcription factor binding (GO:0061629)	27/190	0.009603505575775077	0.5257919302736854	0	0	1.7158988574323184	7.971426203812897	ATF2;GSK3B;HSPB1;HIF1A;ACTB;SIN3A;MIER1;NRIP1;TP53BP2;MTA2;MEF2A;NCOA1;CREBBP;EGR2;JUN;FOS;PROX1;KLF4;PIAS2;HIPK2;RBL1;MDFIC;ID2;CRY1;CTNNB1;TACC1;TACC2
leukemia inhibitory factor receptor activity (GO:0004923)	3/6	0.011297044158612176	0.5301541437291571	0	0	10.308823529411764	46.21666368562023	LIFR;IL6ST;PRLR
oncostatin-M receptor activity (GO:0004924)	3/6	0.011297044158612176	0.5301541437291571	0	0	10.308823529411764	46.21666368562023	LIFR;IL6ST;PRLR
histone methyltransferase binding (GO:1990226)	4/11	0.012169163355231525	0.5330093549591408	0	0	5.892796507397526	25.98045659369348	NOP56;CTNNB1;LCOR;LCORL
histone acetyltransferase activity (GO:0004402)	7/31	0.016689220739959806	0.6736308121237482	0	0	3.0100859788359786	12.320258530937668	ATF2;KAT2B;CREBBP;KAT6A;EPC1;EPC2;KAT7
transmembrane receptor protein serine/threonine kinase activity (GO:0004675)	5/18	0.017430325427859543	0.6736308121237482	0	0	3.967244533495949	16.065530301629114	TGFBR3L;ACVR1B;ACVR2B;ACVR2A;TGFBR1
nuclear receptor binding (GO:0016922)	18/120	0.01854276168309587	0.6768108014329992	0	0	1.8248045367605115	7.276728839586887	NCOA1;KDM3A;KDM4C;JMJD1C;PROX1;HIF1A;FOXP1;NR4A2;LATS1;ASXL1;MED13;NRIP1;CRY1;LCOR;CTNNB1;TACC1;TACC2;PPARGC1B
RNA polymerase II complex binding (GO:0000993)	7/32	0.019773481953576085	0.683746191763131	0	0	2.8895238095238094	11.33679682171663	PCF11;AGO2;HNRNPU;RPRD1A;RPRD2;CDC73;BRD4
histone demethylase activity (H3-K9 specific) (GO:0032454)	4/13	0.0228561819933893	0.6964085019669519	0	0	4.582783122681255	17.31620024646947	KDM3A;KDM4C;JMJD1C;KDM7A
RNA polymerase core enzyme binding (GO:0043175)	7/33	0.023234152498283533	0.6964085019669519	0	0	2.778235653235653	10.452089233268469	PCF11;AGO2;HNRNPU;RPRD1A;RPRD2;SPTY2D1;CDC73
tau-protein kinase activity (GO:0050321)	5/20	0.02721175849342432	0.6964085019669519	0	0	3.437901094752737	12.390560312094497	GSK3B;PRKAA1;TAOK1;DYRK1A;SIK3
RNA polymerase II C-terminal domain binding (GO:0099122)	3/8	0.02764158624855324	0.6964085019669519	0	0	6.184615384615385	22.193083455936613	HNRNPU;SCAF4;BRD4
type II transforming growth factor beta receptor binding (GO:0005114)	3/8	0.02764158624855324	0.6964085019669519	0	0	6.184615384615385	22.193083455936613	TGFBR3L;BAMBI;TGFBR1
ciliary neurotrophic factor receptor activity (GO:0004897)	3/8	0.02764158624855324	0.6964085019669519	0	0	6.184615384615385	22.193083455936613	LIFR;IL6ST;PRLR
phosphatidylinositol phosphate 5-phosphatase activity (GO:0034595)	3/8	0.02764158624855324	0.6964085019669519	0	0	6.184615384615385	22.193083455936613	INPP5F;SYNJ1;SYNJ2
ubiquitin binding (GO:0043130)	12/74	0.028619527478093914	0.6964085019669519	0	0	1.9989730235287646	7.1036824989947736	RNF168;UBXN2B;USP33;NEDD4;TOLLIP;MVB12B;ADRM1;CKS2;HSPB1;RNF19B;UBXN7;RAD23B
protein serine/threonine kinase activity (GO:0004674)	41/344	0.031206318351852242	0.7104396851290138	0	0	1.4020984757435282	4.861264268802464	GSK3B;PRKAA1;TRIO;ACVR1B;KALRN;RPS6KA5;NUAK2;TLK1;MAP4K5;MAP4K3;BRD4;MAP3K2;BRD2;CSNK1G3;PRKAB2;CAMK1D;PLK2;NEK7;DYRK1A;CASK;LMTK2;PRKCA;BRAF;CSNK1E;HIPK1;ACVR2B;NRBP1;TGFBR1;ACVR2A;HIPK2;ERN1;CLK1;LATS1;TAOK1;SIK3;AAK1;SIK1;SGK3;TNIK;SGK1;CDK14
estrogen receptor binding (GO:0030331)	7/35	0.031358829328373514	0.7104396851290138	0	0	2.5795068027210886	8.93092171193805	NCOA1;LATS1;NRIP1;CTNNB1;LCOR;TACC1;PPARGC1B
protein kinase inhibitor activity (GO:0004860)	8/43	0.03297028257506625	0.7220491883939508	0	0	2.3588363989952192	8.048700437381395	CDKN1C;HEXIM1;DNAJC3;CDKN1A;GMFB;SPRY4;SPRY2;PARVA
ubiquitin conjugating enzyme binding (GO:0031624)	6/29	0.038656474703179754	0.7720663895325711	0	0	2.690873260253726	8.753521032128692	RNF144B;DCUN1D3;RNF180;TOLLIP;SIAH1;RNF19B
ciliary neurotrophic factor receptor binding (GO:0005127)	3/9	0.03877959034181864	0.7720663895325711	0	0	5.15356334841629	16.748365531010926	LIFR;IL6ST;PRLR
glucocorticoid receptor binding (GO:0035259)	3/9	0.03877959034181864	0.7720663895325711	0	0	5.15356334841629	16.748365531010926	NR4A2;NRIP1;TACC1
histone-lysine N-methyltransferase activity (GO:0018024)	8/45	0.04195814755074053	0.7843707643296381	0	0	2.231086446628137	7.074959509078713	KMT2E;SETD2;PRDM9;KMT2C;DOT1L;CXXC1;ASH1L;EZH2
DNA-binding transcription factor binding (GO:0140297)	26/208	0.04624147274030999	0.7843707643296381	0	0	1.4774457634056488	4.541488331505107	YAP1;ATF2;GSK3B;HSPB1;SIN3A;MIER1;ZNF703;ZNF503;MTA2;MEF2A;TLE4;ZBTB17;CREBBP;EGR2;JUN;TLE1;TCF12;FOS;KLF4;PIAS2;HIPK2;RBL1;ID2;CTNNB1;SIK1;PTMA
protein kinase regulator activity (GO:0019887)	14/98	0.04983762486010125	0.7843707643296381	0	0	1.7212103965092014	5.161884265854362	HEXIM1;CDKN1C;CDKN1A;CCNT2;GMFB;SPRY4;PARVA;DNAJC3;GPRC5A;CCNY;APC;PRKAR2B;CCNL1;CCNJL
