# Supplementary material for: THZ531 Induces a State of BRCAness in Multiple Myeloma Cells: Synthetic Lethality with Combination Treatment of THZ 531 with DNA Repair Inhibitors
Source: Int J Mol Sci. 2022 Jan 21;23(3):1207. doi: 10.3390/ijms23031207 (PMC8835885; doi:10.3390/ijms23031207)
Supplement: Supplementary file 1 [file ijms-23-01207-s001.zip › Supplementary data/Supplementary Table 2.xlsx]

## Sheet: DESCRIPTION
Combination index predictions of cell lines treated with two drug combinations
CI defines interaction between the two compounds. CI<1, CI=1, and CI>1 represent synergism, additive, and antagonism.

## Sheet: KMS18 THZ531 KU60648
KMS18 THZ531+ KU-0060648
CI Data for Non-Constant Combo: 531 KU (531+KU)
Dose 531	Dose KU	Effect	CI
5.0	625.0	0.29	3.7301
50.0	625.0	0.5	0.54103
100.0	625.0	0.76	0.06831
150.0	625.0	0.89	0.01576
300.0	625.0	0.9	0.02427
500.0	625.0	0.9	0.03938
25.0	1250.0	0.45	1.31872
50.0	1250.0	0.43	1.74746
100.0	1250.0	0.85	0.0271
150.0	1250.0	0.89	0.01786
300.0	1250.0	0.89	0.03151
500.0	1250.0	0.9	0.041
25.0	2500.0	0.58	0.70694
50.0	2500.0	0.68	0.27431
100.0	2500.0	0.89	0.01751
150.0	2500.0	0.9	0.0178
300.0	2500.0	0.9	0.02913
500.0	2500.0	0.9	0.04423
25.0	5000.0	0.75	0.20697
50.0	5000.0	0.82	0.08175
100.0	5000.0	0.89	0.02593
150.0	5000.0	0.9	0.02427
300.0	5000.0	0.89	0.04413
500.0	5000.0	0.9	0.0507
25.0	10000.0	0.87	0.05689
50.0	10000.0	0.89	0.0382
100.0	10000.0	0.89	0.04275
150.0	10000.0	0.9	0.03721
300.0	10000.0	0.9	0.04854
500.0	10000.0	0.9	0.06364

## Sheet: KMS28 THZ531 KU60648
KMS28 THZ531+ KU-0060648
CI Data for Non-Constant Combo: 531 KU (531+KU)
Dose 531	Dose KU	Effect	CI
25.0	625.0	0.12	20.1065
25.0	1250.0	0.36	0.76159
25.0	2500.0	0.39	1.01979
25.0	5000.0	0.55	0.32525
25.0	10000.0	0.67	0.15385
50.0	625.0	0.2	4.12867
50.0	1250.0	0.34	1.05047
50.0	2500.0	0.41	0.85213
50.0	5000.0	0.53	0.42306
50.0	10000.0	0.68	0.13976
100.0	625.0	0.28	1.55592
100.0	1250.0	0.4	0.61874
100.0	2500.0	0.47	0.48966
100.0	5000.0	0.61	0.18799
100.0	10000.0	0.72	0.08824
150.0	625.0	0.49	0.20978
150.0	1250.0	0.622	0.07754
150.0	2500.0	0.68	0.05865
150.0	5000.0	0.74	0.04293
150.0	10000.0	0.8	0.02906
300.0	625.0	0.78	0.01993
300.0	1250.0	0.81	0.01461
300.0	2500.0	0.82	0.01455
300.0	5000.0	0.83	0.01559
300.0	10000.0	0.84	0.01825
500.0	625.0	0.83	0.01629
500.0	1250.0	0.83	0.01707
500.0	2500.0	0.83	0.01864
500.0	5000.0	0.84	0.01847
500.0	10000.0	0.85	0.01966

## Sheet: 8226 THZ531 KU60648
RPMI-8226 THZ531+ KU-0060648
CI Data for Non-Constant Combo: 531 KU (531+KU)
Dose 531	Dose KU	Effect	CI
25.0	625.0	0.01	8151.16
50.0	625.0	0.01	8221.9
100.0	625.0	0.01	8363.39
150.0	625.0	0.15	1.12374
300.0	625.0	0.58	0.00189
500.0	625.0	0.79	8.41e-05
25.0	1250.0	0.04	198.584
50.0	1250.0	0.11	6.78742
100.0	1250.0	0.24	0.36881
150.0	1250.0	0.42	0.02804
300.0	1250.0	0.77	0.000242
500.0	1250.0	0.83	7.49e-05
25.0	2500.0	0.37	0.10744
50.0	2500.0	0.43	0.04938
100.0	2500.0	0.56	0.00974
150.0	2500.0	0.71	0.00128
300.0	2500.0	0.83	0.00015
500.0	2500.0	0.84	0.00012
25.0	5000.0	0.6	0.01169
50.0	5000.0	0.63	0.00789
100.0	5000.0	0.75	0.00136
150.0	5000.0	0.81	0.000456
300.0	5000.0	0.84	0.000239
500.0	5000.0	0.84	0.000239
25.0	10000.0	0.7	0.00593
50.0	10000.0	0.75	0.00272
100.0	10000.0	0.81	0.000913
150.0	10000.0	0.83	0.000599
300.0	10000.0	0.84	0.000478
500.0	10000.0	0.84	0.000478

## Sheet: KMS18 THZ531 OLAPARIB
KMS18 THZ531+ OLAPARIB
CI Data for Non-Constant Combo: 531 KU (531+KU)
Dose 531	Dose KU	Effect	CI
25.0	7.5	0.4	0.83194
50.0	7.5	0.45	0.89111
100.0	7.5	0.49	1.13545
150.0	7.5	0.73	0.22082
300.0	7.5	0.77	0.27552
500.0	7.5	0.78	0.40078
25.0	15.0	0.21	6.68128
50.0	15.0	0.35	2.49686
100.0	15.0	0.37	3.35936
150.0	15.0	0.6	0.76249
300.0	15.0	0.65	0.90945
500.0	15.0	0.74	0.63569
25.0	30.0	0.39	2.02163
50.0	30.0	0.43	1.86522
100.0	30.0	0.44	2.43535
150.0	30.0	0.61	0.84577
300.0	30.0	0.63	1.19608
500.0	30.0	0.72	0.82944
25.0	62.5	0.44	2.47772
50.0	62.5	0.45	2.62471
100.0	62.5	0.54	1.66002
150.0	62.5	0.53	2.143
300.0	62.5	0.65	1.23653
500.0	62.5	0.8	0.40878
25.0	125.0	0.6	1.38088
50.0	125.0	0.61	1.37101
100.0	125.0	0.67	0.95572
150.0	125.0	0.67	1.06882
300.0	125.0	0.78	0.4904
500.0	125.0	0.88	0.16191

## Sheet: KMS28 THZ531 OLAPARIB
KMS28 THZ531+ KU-0060648
CI Data for Non-Constant Combo: 531 KU (531+KU)
Dose 531	Dose KU	Effect	CI
25.0	7.5	0.28	4.42245
50.0	7.5	0.66	0.64678
100.0	7.5	0.84	0.25945
200.0	7.5	0.85	0.45787
400.0	7.5	0.84	1.03405
25.0	15.0	0.34	2.92087
50.0	15.0	0.67	0.60968
100.0	15.0	0.85	0.23054
200.0	15.0	0.85	0.45894
400.0	15.0	0.85	0.91573
25.0	30.0	0.36	2.72796
50.0	30.0	0.69	0.53893
100.0	30.0	0.85	0.23268
200.0	30.0	0.86	0.40494
400.0	30.0	0.86	0.80621
25.0	62.5	0.48	1.3652
50.0	62.5	0.79	0.24042
100.0	62.5	0.86	0.20827
200.0	62.5	0.86	0.4089
400.0	62.5	0.86	0.81018
25.0	125.0	0.75	0.22068
50.0	125.0	0.86	0.11557
100.0	125.0	0.87	0.18775
200.0	125.0	0.88	0.3127
400.0	125.0	0.87	0.71229

## Sheet: 8226 THZ531 OLAPARIB
RPMI 8226 THZ531+ OLAPARIB
CI Data for Non-Constant Combo: 531 KU (531+KU)
Dose 531	Dose KU	Effect	CI
25.0	7.5	0.01	338.943
50.0	7.5	0.14	0.8515
100.0	7.5	0.22	0.27296
150.0	7.5	0.19	0.39978
300.0	7.5	0.33	0.08609
500.0	7.5	0.41	0.04222
25.0	15.0	0.12	2.45726
50.0	15.0	0.26	0.34645
100.0	15.0	0.34	0.15691
150.0	15.0	0.01	959.331
300.0	15.0	0.2	0.70077
500.0	15.0	0.45	0.06022
25.0	30.0	0.3	0.45928
50.0	30.0	0.37	0.23924
100.0	30.0	0.4	0.18403
150.0	30.0	0.37	0.23924
300.0	30.0	0.51	0.07319
500.0	30.0	0.56	0.04826
25.0	62.5	0.39	0.41809
50.0	62.5	0.42	0.32309
100.0	62.5	0.51	0.15248
150.0	62.5	0.42	0.32309
300.0	62.5	0.52	0.14035
500.0	62.5	0.67	0.03824
25.0	125.0	0.45	0.50187
50.0	125.0	0.51	0.30496
100.0	125.0	0.48	0.39098
150.0	125.0	0.5	0.33128
300.0	125.0	0.63	0.1101
500.0	125.0	0.85	0.00914
