# Supplementary material for: THZ531 Induces a State of BRCAness in Multiple Myeloma Cells: Synthetic Lethality with Combination Treatment of THZ 531 with DNA Repair Inhibitors
Source: Int J Mol Sci. 2022 Jan 21;23(3):1207. doi: 10.3390/ijms23031207 (PMC8835885; doi:10.3390/ijms23031207)
Supplement: Supplementary file 1 [file ijms-23-01207-s001.zip › Supplementary data/Supplementary Table 3.pdf]

**Supplementary Table S3. List of primers and shRNAs used in this study.**

**RT-PCR Primers**

|          |                         |
|----------|-------------------------|
| BRCA1 FP | TTCACCCTCTGCTCTGGGTA    |
| BRCA1 RP | TGGTCACACTTTGTGGAGACA   |
| RAD51 FP | CAATGCAGATGCAGCTTGAA    |
| RAD51 RP | CCTTGGCTTCACTAATTCCCT   |
| XRCC2 FP | CAGTTGGTGAATGGCGTTGG    |
| XRCC2 RP | TACCTTCAAGTCGGGCAAGG    |
| GAPDH FP | CTCCTCCTGTTTCGACAGTCAGC |
| GAPDH RP | CCATGGAATTTGCCATGGGTGG  |

**shRNA target sequences**

|           |                                                                |
|-----------|----------------------------------------------------------------|
| CDK12 Sh1 | CCGGGCGTTCCCGGGACTTACTAAACTCGAGTTTAGTAAGTCCCGGGAAC<br>GCTTTTTG |
| CDK12 Sh2 | CCGGTTGGACTTGCTCGGCTCTATACTCGAGTATAGAGCCGAGCAAGTCC<br>AATTTTTG |
| CDK12 Sh3 | CCGGATTTCTGCATCGGGATATTACTCGAGTAATATCCCGATGCAGGAA<br>ATTTTTTG  |
| CDK12 Sh4 | CCGGCTATTGGTAAATCGCATTAAACTCGAGTTTAATGCGATTTACCAATA<br>GTTTTTG |

**List of antibodies used in this study:** All primary antibody incubations were overnight

|                   |                  |
|-------------------|------------------|
| RNA Pol II        | SC-900           |
| RNA Pol II pSer2  | Bethyl A300-654A |
| PARP              | CST 9532         |
| RAD51             | CST 8875         |
| Cleaved Caspase 9 | CST 9661         |
| $\gamma$ -H2AX    | Millipore 05-636 |
| H3                | CST 4499         |
| Alpha Tubulin     | SC-8035          |
| $\beta$ actin     | Sigma A5441      |
| GAPDH             | CST 2118         |
